# Supplementary material for: Effects of Trichoderma harzianum and Bacillus subtilis on the root and soil microbiomes of the soybean plant INTACTA RR2 PRO™
Source: Front Plant Sci. 2024 Aug 27;15:1403160. doi: 10.3389/fpls.2024.1403160 (PMC11383790; doi:10.3389/fpls.2024.1403160)
Supplement: Supplementary file 4 [file Table1.docx]

**Effects of *Trichoderma harzianum* and *Bacillus subtilis* on the root and soil microbiomes of the soybean plant INTACTA RR2 PRO™**

Everlon Cid Rigobelo 1*, Luana Alves de Andrade 1, Carlos Henrique Barbosa Santos 1, Edvan Teciano Frezarin 1, Luziane Ramos Sales 1, Lucas Amoroso Lopes de Carvalho 1, Daniel Guariz Pinheiro 1, Daniel Nicodemo 2, Olubukola Oluranti Babalola 3, Maria Carolina Quecine Verdi 4, Mateus Mondin 4, Nicolas Desoignies 4

1 Agricultural and Livestock Microbiology Postgraduate Program, São Paulo State University (UNESP), School of Agricultural and Veterinarian Sciences, Jaboticabal, São Paulo, Brazil

2 Faculty of Agrarian and Veterinary Sciences, State University of São Paulo (UNESP), Jaboticabal, Brazil

3 Food Security and Safety Niche Area, Faculty of Natural and Agricultural Sciences, North‒West University, Mmabatho 2735, South Africa

4 University of São Paulo, College of Agriculture “Luiz de Queiroz”, Genetics Science Department, Piracicaba, Brazil

5 Phytopathology, Microbial and Molecular Farming Lab, Center D'Etudes et Recherche Appliquée-Haute Ecole Provinciale du Hainaut Condorcet, Ath, Belgium.

***** Correspondence:[everlon.cid@unesp.br](mailto:everlon.cid@unesp.br)

ORCID: 0000-0002-9734-3338

**Supplementary Material**

**Transformation of *Trichoderma harzianum* mediated by *Agrobacterium tumefaciens***

To evaluate *T. harzianum* colonization in soybean roots, we performed the transformation of fungal lineages mediated by *Agrobacterium tumefaciens* to introduce specific markers. For this, we used a disarmed *A. tumefaciens* strain EHA05 containing the plasmids pFAT-GFP (Montoya et al., 2021) and pCAM-DsRed (Villena et al., 2020), provided by Prof. Dr. Maria Caroline Quecine Verdi from the University of São Paulo (ESALQ/USP). The pFAT-GFP vector includes the hygromycin B resistance gene (*hph*) driven by the glyceraldehyde-3-phosphate dehydrogenase (*gpd*) promoter from *Glomerella cingulata* and the green fluorescent protein (*gfp*) gene from *Aequorea victoria*. The pCAM-DsRed vector contains the *hph* gene driven by the *gpd* promoter from *Aspergillus nidulans* and the red fluorescent protein gene (*DsRed*) from *Discosoma* sp.

The transformed *A. tumefaciens* EHA05 cells were cultured in YEP media (10 g yeast extract, 10 g peptone, 5 g NaCl, 15 g agar, and 1000 mL distilled water; pH 7.0) with spectinomycin and rifampicin (100 μg/mL each). Prior to transformation, fungal strains were assessed for hygromycin B susceptibility by cultivating them on PDA for 7 days and then transferring 8 mm discs to PDA plates with various hygromycin B concentrations (0, 5, 10, 25, 50, 100, 200, 400 μg/mL) at 26°C for 7 days. The concentration that completely inhibited growth was chosen for transformation.

For transformation, the *A. tumefaciens* culture with binary vectors was incubated in YEP media (25 mL) with 300 μg/mL spectinomycin and 100 μg/mL rifampicin for 24 h at 26°C ± 2°C under 200 rpm agitation (Bernardi-Wenzel et al., 2016). The culture was diluted to an OD of 0.2 at 660 nm in induction medium (MI) containing 10 mM K2HPO4, 10 mM KH2PO4, 2.5 mM NaCl, 2 mM MgSO4, 0.7 mM CaCl2, 9 μM FeSO4, 4 mM NH4SO4, 10 mM glucose, 0.5% glycerol (pH 5.3), 40 mM MES, and 200 μM acetosyringone. The mixture was incubated under the same conditions for 6 h or until reaching an OD of 0.6 at 660 nm. At the target OD, the bacterial culture was mixed with a conidial suspension (106 conidia/mL) of each fungus at a 1:1 ratio. Aliquots of 200 μL were applied to filter paper (8 μm, J. Prolab, Brazil) and/or nylon membranes (0.45 μm Amersham Hybon N+ or GE Healthcare) on MI plates (with 1.5% agar) with 200 μM acetosyringone. Plates were incubated at 25°C ± 2°C for 96 h, then transferred to PDA plates with the selected hygromycin B concentration and 300 μg/mL cefoxitin sodium to eliminate bacterial cells. Transformant growth was observed after 7 to 20 days at 28°C. Transformants were analyzed using fluorescence microscopy. Mycelia were cultured on PDA with hygromycin B, and after 4–7 days at 28°C, coverslips were mounted on slides with sterile distilled water and sealed for microscopic analysis using 480 nm filters for GFP and 545 nm filters for *DsRed*.

Transformation was further confirmed by colony PCR to amplify the *gfp*, *DsRed*, and *hph* genes using specific primers: glGFP5 and glGFP3 (Fitzgerald et al., 2003) for *gfp*, U61 and U62 (Eckert et al., 2005) for *DsRed*, and hph1 and hph2 (Ghadmagahi et al., 2022) for *hph*. PCR reactions were conducted in 25 μL volumes with 0.2 mM dNTPs, 3.7 mM MgCl2, 1× buffer (50 mM KCl; 20 mM Tris-HCl; pH 8.4), Taq DNA polymerase (0.05 U/μL), 0.2 μM primers, and template DNA. The program was 94°C for 5 min; 30 cycles of 94°C for 1 min, 60°C for 1 min, 72°C for 1 min; and a final extension at 72°C for 7 min, followed by analysis on a 1.2% agarose gel. The mitotic stability of transformants was tested by subculturing for five generations on PDA without hygromycin B from monosporic cultures grown on PDA with the antibiotic. Stability was confirmed by regrowth on PDA with hygromycin B after five transfers. After the plant experiment, root material was collected and taken to the Epigenetics Laboratory of the Genetics Department of ESALQ/USP for imaging to verify colonization, as shown in the figure below.

**Supplementary Mat. Figure 1**. Colonization of soybean roots by GFP-modified *Trichoderma harzianum*.


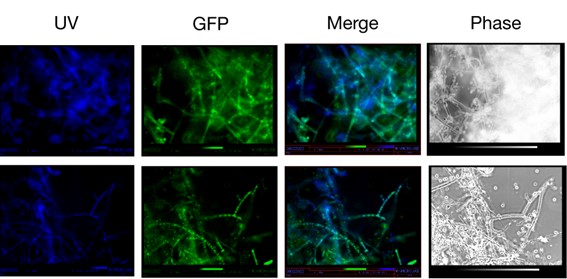


**References**

Montoya, M. R. A., Massa, G. A., Colabelli, M. N., and Ridao, A. del C. (2021). Efficient *Agrobacterium tumefaciens*-mediated transformation system of *Diaporthe caulivora*. *J Microbiol Methods* 184. doi: 10.1016/j.mimet.2021.106197

Villena, C. I. F., Gomes, R. R., Fernandes, L., Florencio, C. S., Bombassaro, A., Grisolia, M. E., et al. (2020). *Agrobacterium tumefaciens*-mediated transformation of *Fonsecaea monophora* and *Fonsecaea erecta* for host-environment interaction studies. *Journal of Fungi* 6, 1–11. doi: 10.3390/jof6040325

Bernardi-Wenzel, J., Quecine, M. C., Azevedo, J. L., & Pamphile, J. A. (2016). Agrobacterium-mediated transformation of Fusarium proliferatum. *Genet Mol Res*, *15*(2), 01-12.

Fitzgerald, A. M., Mudge, A. M., Gleave, A. P., & Plummer, K. M. (2003). Agrobacterium and PEG-mediated transformation of the phytopathogen Venturia inaequalis. *Mycological research*, *107*(7), 803-810.

Eckert, M., Maguire, K., Urban, M., Foster, S., Fitt, B., Lucas, J., & Hammond-Kosack, K. (2005). Agrobacterium tumefaciens-mediated transformation of Leptosphaeria spp. and Oculimacula spp. with the reef coral gene DsRed and the jellyfish gene gfp. *FEMS microbiology letters*, *253*(1), 67-74.

Ghadmagahi, V., Zafari, D., and Soltani J. (2022). *Agrobacterium tumefaciens*-mediated transformation of *Trichoderma viridescens*. *Mycol Iran* 9, 67–73. doi: 10.22043/MI.2022.360018.1230
