# Supplementary material for: Effects of Trichoderma harzianum and Bacillus subtilis on the root and soil microbiomes of the soybean plant INTACTA RR2 PRO™
Source: Front Plant Sci. 2024 Aug 27;15:1403160. doi: 10.3389/fpls.2024.1403160 (PMC11383790; doi:10.3389/fpls.2024.1403160)
Supplement: Supplementary file 5 [file Table2.xlsx]

## Sheet: %Kingdom
Kingdom	T1-R	T1-S	T2-R	T2-S	T3-R	T3-S	T4-R	T4-S	T5-R	T5-S	T6-R	T6-S	T7-R	T7-S
Bacteria	1	1	1	0.996078	1	0.99491	1	1	1	1	1	1	1	1
Archaea	0	0	0	0.00392177	0	0.0050905	0	0	0	0	0	0	0	0

## Sheet: %Phylum
Kingdom	Phylum	T1-R	T1-S	T2-R	T2-S	T3-R	T3-S	T4-R	T4-S	T5-R	T5-S	T6-R	T6-S	T7-R	T7-S
Bacteria	p__Proteobacteria	0.903441	0.582806	0.771438	0.473974	0.825698	0.475679	0.753947	0.75565	0.846593	0.532307	0.809709	0.570988	0.874442	0.629114
Bacteria	p__Firmicutes	0.00136064	0.310383	0.00329489	0.234389	0.00622506	0.364725	0	0.158601	0.0112922	0.301653	0.003405	0.324074	0.000380192	0.298609
Bacteria	p__Actinobacteriota	0.0607831	0.0360997	0.204283	0.065244	0.1361	0.0223416	0.207211	0.00478596	0.0784037	0.0469572	0.138438	0	0.0748978	0.0145911
Bacteria	p__Bacteroidota	0.015577	0.0677335	0.0121391	0.150046	0.0223996	0.0904035	0.016533	0.0776389	0.0514564	0.0642374	0.0267536	0.0462963	0.0249026	0.0556498
Bacteria	p__Desulfobacterota	0	0	0	0.0120709	0	0.00377074	0	0.00332358	0	0	0	0.058642	0	0
Bacteria	p__Nitrospinota	0.00326084	0	0	0.00259753	0	0.0106523	0	0	0	0.054846	0	0	0	0
Bacteria	p__Patescibacteria	0.00931335	0	0.00251452	0	0.00335196	0.00367647	0.0162343	0	0.00545361	0	0.0123553	0	0.00703355	0
Bacteria	p__Chloroflexota	0.00159523	0	0.00390185	0.00504227	0.00239425	0.00216817	0.00542802	0	0.00218144	0	0	0	0.0107404	0
Bacteria	p__Acidobacteriota	0	0	0	0.0159927	0.00250067	0	0	0	0.0012832	0	0	0	0	0
Bacteria	p__Deinococcota	0.00194712	0	0.00182086	0	0	0	0	0	0	0	0.00807472	0	0.00275639	0
Bacteria	p__Campylobacterota	0	0	0	0.00275033	0	0.0111237	0	0	0	0	0	0	0	0
Bacteria	p__Fusobacteriota	0	0.0029773	0	0.00677396	0	0	0	0	0	0	0	0	0	0.00203597
Bacteria	p__Bdellovibrionota	0.00239285	0	0	0.00305592	0	0	0	0	0	0	0.000778286	0	0.00484745	0
Bacteria	p__CSP1-3	0	0	0	0	0	0.0103695	0	0	0	0	0	0	0	0
Bacteria	p__Planctomycetota	0	0	0	0.00657024	0	0	0	0	0.00173232	0	0	0	0	0
Bacteria	p__Gemmatimonadota	0.00032843	0	0	0.00789447	0	0	0	0	0	0	0	0	0	0
Archaea	p__Thermoproteota	0	0	0	0	0	0.0050905	0	0	0	0	0	0	0	0
Bacteria	p__Myxococcota	0	0	0	0.00290313	0.00133014	0	0	0	0	0	0.000486429	0	0	0
Bacteria	p__Nitrospirota	0	0	0	0.00432922	0	0	0	0	0	0	0	0	0	0
Archaea	p__Halobacteriota	0	0	0	0.00392177	0	0	0	0	0	0	0	0	0	0
Bacteria	p__Verrucomicrobiota	0	0	0.000606954	0	0	0	0.000647378	0	0.001604	0	0	0	0	0
Bacteria	p__Synergistota	0	0	0	0.00244474	0	0	0	0	0	0	0	0	0	0

## Sheet: %Class
Kingdom	Phylum	Class	T1-R	T1-S	T2-R	T2-S	T3-R	T3-S	T4-R	T4-S	T5-R	T5-S	T6-R	T6-S	T7-R	T7-S
Bacteria	p__Proteobacteria	c__Gammaproteobacteria	0.596242	0.483811	0.429377	0.256799	0.510455	0.438066	0.352472	0.453669	0.179584	0.445154	0.234653	0.5	0.270317	0.420428
Bacteria	p__Proteobacteria	c__Alphaproteobacteria	0.303071	0.0989952	0.342062	0.211215	0.315243	0.0376131	0.401474	0.301981	0.667009	0.0871525	0.575056	0.0709877	0.604125	0.208687
Bacteria	p__Firmicutes	c__Bacilli	0.00114951	0.154075	0.00329489	0.0928491	0.00622506	0.225113	0	0.0648099	0.00513281	0.242675	0.00243214	0.188272	0	0.147608
Bacteria	p__Actinobacteriota	c__Actinomycetia	0.0606423	0.0323781	0.203763	0.0570439	0.1361	0.0187594	0.207211	0	0.0784037	0.0469572	0.138438	0	0.0748978	0.0145911
Bacteria	p__Bacteroidota	c__Bacteroidia	0.015577	0.0677335	0.0121391	0.150046	0.0223996	0.0904035	0.016533	0.0776389	0.0514564	0.0642374	0.0267536	0.0462963	0.0249026	0.0556498
Bacteria	p__Firmicutes	c__Clostridia	0	0.112021	0	0.123154	0	0.11793	0	0.0853496	0.00295137	0.0195342	0	0.0216049	0	0.124873
Bacteria	p__Firmicutes	c__Negativicutes	0.000211134	0.0442873	0	0.0145666	0	0.0216817	0	0.0084419	0.00320801	0.039444	0.000972857	0.114198	0.000380192	0.0261283
Bacteria	p__Nitrospinota	c__UBA7883	0.00326084	0	0	0.00259753	0	0.0106523	0	0	0	0.054846	0	0	0	0
Bacteria	p__Desulfobacterota	c__Desulfovibrionia	0	0	0	0.00590812	0	0	0	0.00332358	0	0	0	0.058642	0	0
Bacteria	p__Patescibacteria	c__Saccharimonadia	0.00931335	0	0.00251452	0	0.00335196	0.00367647	0.0162343	0	0.00545361	0	0.0123553	0	0.00703355	0
Bacteria	p__Chloroflexota	c__Chloroflexia	0.00159523	0	0.00390185	0	0.00159617	0	0.00542802	0	0.00218144	0	0	0	0.0107404	0
Bacteria	p__Deinococcota	c__Deinococci	0.00194712	0	0.00182086	0	0	0	0	0	0	0	0.00807472	0	0.00275639	0
Bacteria	p__Campylobacterota	c__Campylobacteria	0	0	0	0.00275033	0	0.0111237	0	0	0	0	0	0	0	0
Bacteria	p__Fusobacteriota	c__Fusobacteriia	0	0.0029773	0	0.00677396	0	0	0	0	0	0	0	0	0	0.00203597
Bacteria	p__Bdellovibrionota	c__Bdellovibrionia	0.00239285	0	0	0.00305592	0	0	0	0	0	0	0.000778286	0	0.00484745	0
Bacteria	p__CSP1-3	c__CSP1-3	0	0	0	0	0	0.0103695	0	0	0	0	0	0	0	0
Bacteria	p__Proteobacteria	c__Unidentified	0.00412884	0	0	0.00595905	0	0	0	0	0	0	0	0	0	0
Bacteria	p__Desulfobacterota	c__Binatia	0	0	0	0.00616278	0	0.00377074	0	0	0	0	0	0	0	0
Bacteria	p__Acidobacteriota	c__Vicinamibacteria	0	0	0	0.00748701	0.000798085	0	0	0	0.0012832	0	0	0	0	0
Bacteria	p__Acidobacteriota	c__Acidobacteriae	0	0	0	0.00850565	0	0	0	0	0	0	0	0	0	0
Bacteria	p__Actinobacteriota	c__Unidentified	0	0	0	0	0	0.0035822	0	0.00478596	0	0	0	0	0	0
Bacteria	p__Gemmatimonadota	c__Gemmatimonadetes	0.00032843	0	0	0.00789447	0	0	0	0	0	0	0	0	0	0
Archaea	p__Thermoproteota	c__Bathyarchaeia	0	0	0	0	0	0.0050905	0	0	0	0	0	0	0	0
Bacteria	p__Myxococcota	c__Polyangia	0	0	0	0.00290313	0.00133014	0	0	0	0	0	0.000486429	0	0	0
Bacteria	p__Actinobacteriota	c__Thermoleophilia	0	0	0	0.00463482	0	0	0	0	0	0	0	0	0	0
Bacteria	p__Planctomycetota	c__Planctomycetia	0	0	0	0.00453295	0	0	0	0	0	0	0	0	0	0
Bacteria	p__Nitrospirota	c__Nitrospiria	0	0	0	0.00432922	0	0	0	0	0	0	0	0	0	0
Archaea	p__Halobacteriota	c__Methanosarcinia	0	0	0	0.00392177	0	0	0	0	0	0	0	0	0	0
Bacteria	p__Firmicutes	c__Unidentified	0	0	0	0.0038199	0	0	0	0	0	0	0	0	0	0
Bacteria	p__Actinobacteriota	c__Rubrobacteria	0	0.00372162	0	0	0	0	0	0	0	0	0	0	0	0
Bacteria	p__Chloroflexota	c__Ktedonobacteria	0	0	0	0.00356524	0	0	0	0	0	0	0	0	0	0
Bacteria	p__Verrucomicrobiota	c__Verrucomicrobiae	0	0	0.000606954	0	0	0	0.000647378	0	0.001604	0	0	0	0	0
Bacteria	p__Synergistota	c__Synergistia	0	0	0	0.00244474	0	0	0	0	0	0	0	0	0	0
Bacteria	p__Chloroflexota	c__Unidentified	0	0	0	0	0	0.00216817	0	0	0	0	0	0	0	0
Bacteria	p__Actinobacteriota	c__Acidimicrobiia	0	0	0.000520246	0.00157889	0	0	0	0	0	0	0	0	0	0
Bacteria	p__Planctomycetota	c__SZUA-567	0	0	0	0.00203728	0	0	0	0	0	0	0	0	0	0
Bacteria	p__Planctomycetota	c__Phycisphaerae	0	0	0	0	0	0	0	0	0.00173232	0	0	0	0	0
Bacteria	p__Acidobacteriota	c__Blastocatellia	0	0	0	0	0.00170258	0	0	0	0	0	0	0	0	0
Bacteria	p__Chloroflexota	c__Limnocylindria	0	0	0	0.00147703	0	0	0	0	0	0	0	0	0	0
Bacteria	p__Actinobacteriota	c__UBA4738	0	0	0	0.00132423	0	0	0	0	0	0	0	0	0	0
Bacteria	p__Chloroflexota	c__Anaerolineae	0	0	0	0	0.000798085	0	0	0	0	0	0	0	0	0
Bacteria	p__Actinobacteriota	c__Coriobacteriia	0	0	0	0.000662117	0	0	0	0	0	0	0	0	0	0
Bacteria	p__Actinobacteriota	c__Geothermincolia	0.000140756	0	0	0	0	0	0	0	0	0	0	0	0	0

## Sheet: %Order
Kingdom	Phylum	Class	Order	T1-R	T1-S	T2-R	T2-S	T3-R	T3-S	T4-R	T4-S	T5-R	T5-S	T6-R	T6-S	T7-R	T7-S
Bacteria	p__Proteobacteria	c__Gammaproteobacteria	o__Enterobacterales	0.364182	0.310755	0.0519379	0.0920342	0.318968	0.286482	0.0906329	0.396304	0.0475427	0.285875	0.0142037	0.351852	0.0133067	0.275874
Bacteria	p__Proteobacteria	c__Gammaproteobacteria	o__Burkholderiales	0.220189	0.164496	0.369462	0.155496	0.132269	0.13207	0.253424	0.0444031	0.0887335	0.15139	0.204786	0.148148	0.251687	0.129284
Bacteria	p__Proteobacteria	c__Alphaproteobacteria	o__Sphingomonadales	0.105215	0.0989952	0.127374	0.0624427	0.093908	0.0350679	0.184154	0.266684	0.266714	0.0818933	0.223757	0.0709877	0.353293	0.165592
Bacteria	p__Proteobacteria	c__Alphaproteobacteria	o__Rhizobiales	0.140826	0	0.189716	0.117347	0.192551	0.00254525	0.189632	0.0200744	0.359746	0	0.319681	0	0.210721	0.0393621
Bacteria	p__Firmicutes	c__Bacilli	o__Lactobacillales	0.00068032	0.139189	0	0.0339717	0.000798085	0.187123	0	0.0560356	0.00449121	0.182945	0.00165386	0.12037	0	0.0980658
Bacteria	p__Bacteroidota	c__Bacteroidia	o__Bacteroidales	0	0.0584295	0	0.131558	0	0.0878582	0	0.0776389	0.00590273	0.0642374	0	0.0462963	0	0.0427553
Bacteria	p__Actinobacteriota	c__Actinomycetia	o__Streptomycetales	0.0346025	0	0.133703	0.00432922	0.0434158	0	0.12599	0	0.0143719	0	0.0502967	0	0.0530368	0
Bacteria	p__Actinobacteriota	c__Actinomycetia	o__Actinomycetales	0.0157177	0.0279122	0.0268794	0.0168585	0.0780527	0.0187594	0.0159355	0	0.0619145	0.0469572	0.0352174	0	0	0.0145911
Bacteria	p__Firmicutes	c__Clostridia	o__Peptostreptococcales	0	0.06885	0	0.0348885	0	0.0762632	0	0.0276522	0.00295137	0.0195342	0	0	0	0.0542925
Bacteria	p__Proteobacteria	c__Alphaproteobacteria	o__Caulobacterales	0.038051	0	0.022544	0.0283182	0.0226656	0	0.0276879	0.015222	0.0274605	0.0052592	0.0316179	0	0.0401103	0.00373261
Bacteria	p__Firmicutes	c__Negativicutes	o__Veillonellales	0.000211134	0.0442873	0	0.00926963	0	0.0216817	0	0.00106355	0.00320801	0.0341848	0.000972857	0.0802469	0.000380192	0.0261283
Bacteria	p__Actinobacteriota	c__Actinomycetia	o__Mycobacteriales	0.00933681	0	0.041533	0.0207803	0.0146316	0	0.0472586	0	0.00211728	0	0.0529234	0	0.021861	0
Bacteria	p__Firmicutes	c__Bacilli	o__Haloplasmatales	0	0	0	0.0188449	0	0.0135747	0	0.00850838	0	0.0345605	0.000778286	0.0679012	0	0.0400407
Bacteria	p__Proteobacteria	c__Gammaproteobacteria	o__Pseudomonadales	0.00107913	0	0.00416197	0.00366711	0.0188348	0.0195136	0.00333649	0	0.0314385	0.00788881	0.00826929	0	0	0.0152698
Bacteria	p__Firmicutes	c__Clostridia	o__Oscillospirales	0	0.00483811	0	0.0526637	0	0	0	0.0279181	0	0	0	0	0	0.0213777
Bacteria	p__Proteobacteria	c__Gammaproteobacteria	o__Xanthomonadales	0.0104394	0	0.00294806	0.00560253	0.0392126	0	0.00507943	0.012962	0.00866162	0	0.00739372	0	0.00418211	0
Bacteria	p__Bacteroidota	c__Bacteroidia	o__Chitinophagales	0.0131841	0	0.0110119	0.0025466	0.00425645	0.00254525	0.0161347	0	0.0114847	0	0.00330771	0	0.0233818	0
Bacteria	p__Firmicutes	c__Clostridia	o__Lachnospirales	0	0	0	0.00769074	0	0.0246041	0	0.0130949	0	0	0	0.0216049	0	0.0176451
Bacteria	p__Firmicutes	c__Bacilli	o__Staphylococcales	0	0	0	0.0133442	0	0.0244155	0	0	0	0.025169	0	0	0	0.0084832
Bacteria	p__Nitrospinota	c__UBA7883	o__UBA7883	0.00326084	0	0	0.00259753	0	0.0106523	0	0	0	0.054846	0	0	0	0
Bacteria	p__Desulfobacterota	c__Desulfovibrionia	o__Desulfovibrionales	0	0	0	0.00590812	0	0	0	0.00332358	0	0	0	0.058642	0	0
Bacteria	p__Firmicutes	c__Clostridia	o__Tissierellales	0	0.00818757	0	0.00468575	0	0.0170626	0	0.000531773	0	0	0	0	0	0.0315575
Bacteria	p__Patescibacteria	c__Saccharimonadia	o__Saccharimonadales	0.00931335	0	0.00251452	0	0.00335196	0.00367647	0.0162343	0	0.00545361	0	0.0123553	0	0.00703355	0
Bacteria	p__Bacteroidota	c__Bacteroidia	o__Cytophagales	0.000539564	0	0	0	0.00856611	0	0	0	0.0259207	0	0.0160521	0	0	0
Bacteria	p__Bacteroidota	c__Bacteroidia	o__Flavobacteriales	0	0.00930406	0.0011272	0.0100336	0.00260708	0	0	0	0.00686514	0	0.00739372	0	0	0.0128945
Bacteria	p__Firmicutes	c__Clostridia	o__TANB77	0	0.0301451	0	0.00799633	0	0	0	0.0079766	0	0	0	0	0	0
Bacteria	p__Firmicutes	c__Negativicutes	o__Acidaminococcales	0	0	0	0.00305592	0	0	0	0.00245945	0	0	0	0.0339506	0	0
Bacteria	p__Chloroflexota	c__Chloroflexia	o__Chloroflexales	0.00159523	0	0.00390185	0	0.00159617	0	0.00542802	0	0.00218144	0	0	0	0.0107404	0
Bacteria	p__Actinobacteriota	c__Actinomycetia	o__Streptosporangiales	0	0	0	0.00392177	0	0	0.0164334	0	0	0	0	0	0	0
Bacteria	p__Proteobacteria	c__Alphaproteobacteria	o__Unidentified	0.0176179	0	0	0	0	0	0	0	0	0	0	0	0	0
Bacteria	p__Proteobacteria	c__Alphaproteobacteria	o__Rhodobacterales	0	0	0.00242782	0	0.00548018	0	0	0	0.00923906	0	0	0	0	0
Bacteria	p__Deinococcota	c__Deinococci	o__Deinococcales	0.00194712	0	0.00182086	0	0	0	0	0	0	0	0.00807472	0	0.00275639	0
Bacteria	p__Campylobacterota	c__Campylobacteria	o__Campylobacterales	0	0	0	0.00275033	0	0.0111237	0	0	0	0	0	0	0	0
Bacteria	p__Firmicutes	c__Bacilli	o__Erysipelotrichales	0	0	0	0.0124274	0	0	0	0.000265887	0	0	0	0	0	0.00101798
Bacteria	p__Firmicutes	c__Clostridia	o__Clostridiales	0	0	0	0.00718142	0	0	0	0.00651422	0	0	0	0	0	0
Bacteria	p__Firmicutes	c__Bacilli	o__Acholeplasmatales	0	0.0133978	0	0	0	0	0	0	0	0	0	0	0	0
Bacteria	p__Firmicutes	c__Negativicutes	o__Selenomonadales	0	0	0	0.00224101	0	0	0	0.0049189	0	0.0052592	0	0	0	0
Bacteria	p__Actinobacteriota	c__Actinomycetia	o__Propionibacteriales	0.000985291	0.00446595	0.00164745	0.00341245	0	0	0.00159355	0	0	0	0	0	0	0
Bacteria	p__Bacteroidota	c__Bacteroidia	o__Sphingobacteriales	0.00185329	0	0	0	0.00696994	0	0.000398387	0	0.0012832	0	0	0	0.00152077	0
Bacteria	p__Fusobacteriota	c__Fusobacteriia	o__Fusobacteriales	0	0.0029773	0	0.00677396	0	0	0	0	0	0	0	0	0	0.00203597
Bacteria	p__CSP1-3	c__CSP1-3	o__CSP1-3	0	0	0	0	0	0.0103695	0	0	0	0	0	0	0	0
Bacteria	p__Proteobacteria	c__Unidentified	o__Unidentified	0.00412884	0	0	0.00595905	0	0	0	0	0	0	0	0	0	0
Bacteria	p__Desulfobacterota	c__Binatia	o__UBA9968	0	0	0	0.00616278	0	0.00377074	0	0	0	0	0	0	0	0
Bacteria	p__Acidobacteriota	c__Vicinamibacteria	o__Vicinamibacterales	0	0	0	0.00748701	0.000798085	0	0	0	0.0012832	0	0	0	0	0
Bacteria	p__Firmicutes	c__Bacilli	o__Exiguobacterales	0	0	0.00329489	0	0.00542698	0	0	0	0.000641601	0	0	0	0	0
Bacteria	p__Proteobacteria	c__Gammaproteobacteria	o__Unidentified	0	0.00855973	0	0	0	0	0	0	0	0	0	0	0	0
Bacteria	p__Actinobacteriota	c__Unidentified	o__Unidentified	0	0	0	0	0	0.0035822	0	0.00478596	0	0	0	0	0	0
Bacteria	p__Firmicutes	c__Bacilli	o__Bacillales	0.000469186	0	0	0.00789447	0	0	0	0	0	0	0	0	0	0
Bacteria	p__Firmicutes	c__Clostridia	o__Christensenellales	0	0	0	0.00662117	0	0	0	0.00166179	0	0	0	0	0	0
Bacteria	p__Gemmatimonadota	c__Gemmatimonadetes	o__Gemmatimonadales	0.00032843	0	0	0.00789447	0	0	0	0	0	0	0	0	0	0
Bacteria	p__Bdellovibrionota	c__Bdellovibrionia	o__Bdellovibrionales	0.00239285	0	0	0	0	0	0	0	0	0	0.000778286	0	0.00484745	0
Bacteria	p__Actinobacteriota	c__Actinomycetia	o__Unidentified	0	0	0	0.00774167	0	0	0	0	0	0	0	0	0	0
Bacteria	p__Bacteroidota	c__Bacteroidia	o__Unidentified	0	0	0	0.00590812	0	0	0	0	0	0	0	0	0	0
Bacteria	p__Proteobacteria	c__Gammaproteobacteria	o__Steroidobacterales	0.00035189	0	0.000867077	0	0.00117052	0	0	0	0.00237393	0	0	0	0.00114058	0
Bacteria	p__Proteobacteria	c__Alphaproteobacteria	o__Azospirillales	0.00136064	0	0	0	0	0	0	0	0.00384961	0	0	0	0	0
Archaea	p__Thermoproteota	c__Bathyarchaeia	o__B26-1	0	0	0	0	0	0.0050905	0	0	0	0	0	0	0	0
Bacteria	p__Planctomycetota	c__Planctomycetia	o__Gemmatales	0	0	0	0.00453295	0	0	0	0	0	0	0	0	0	0
Bacteria	p__Acidobacteriota	c__Acidobacteriae	o__Acidobacteriales	0	0	0	0.00443109	0	0	0	0	0	0	0	0	0	0
Bacteria	p__Nitrospirota	c__Nitrospiria	o__Nitrospirales	0	0	0	0.00432922	0	0	0	0	0	0	0	0	0	0
Bacteria	p__Firmicutes	c__Bacilli	o__RF39	0	0.00148865	0	0.00249567	0	0	0	0	0	0	0	0	0	0
Archaea	p__Halobacteriota	c__Methanosarcinia	o__Methanotrichales	0	0	0	0.00392177	0	0	0	0	0	0	0	0	0	0
Bacteria	p__Firmicutes	c__Unidentified	o__Unidentified	0	0	0	0.0038199	0	0	0	0	0	0	0	0	0	0
Bacteria	p__Actinobacteriota	c__Rubrobacteria	o__Rubrobacterales	0	0.00372162	0	0	0	0	0	0	0	0	0	0	0	0
Bacteria	p__Chloroflexota	c__Ktedonobacteria	o__Ktedonobacterales	0	0	0	0.00356524	0	0	0	0	0	0	0	0	0	0
Bacteria	p__Bdellovibrionota	c__Bdellovibrionia	o__UBA1018	0	0	0	0.00305592	0	0	0	0	0	0	0	0	0	0
Bacteria	p__Actinobacteriota	c__Thermoleophilia	o__Unidentified	0	0	0	0.00305592	0	0	0	0	0	0	0	0	0	0
Bacteria	p__Firmicutes	c__Bacilli	o__Paenibacillales	0	0	0	0.00280126	0	0	0	0	0	0	0	0	0	0
Bacteria	p__Myxococcota	c__Polyangia	o__Palsa-1104	0	0	0	0.0025466	0	0	0	0	0	0	0	0	0	0
Bacteria	p__Synergistota	c__Synergistia	o__Synergistales	0	0	0	0.00244474	0	0	0	0	0	0	0	0	0	0
Bacteria	p__Acidobacteriota	c__Acidobacteriae	o__Unidentified	0	0	0	0.00234287	0	0	0	0	0	0	0	0	0	0
Bacteria	p__Chloroflexota	c__Unidentified	o__Unidentified	0	0	0	0	0	0.00216817	0	0	0	0	0	0	0	0
Bacteria	p__Proteobacteria	c__Alphaproteobacteria	o__RF32	0	0	0	0.00213915	0	0	0	0	0	0	0	0	0	0
Bacteria	p__Planctomycetota	c__SZUA-567	o__SZUA-567	0	0	0	0.00203728	0	0	0	0	0	0	0	0	0	0
Bacteria	p__Verrucomicrobiota	c__Verrucomicrobiae	o__Opitutales	0	0	0.000606954	0	0	0	0.000647378	0	0.000577441	0	0	0	0	0
Bacteria	p__Planctomycetota	c__Phycisphaerae	o__Phycisphaerales	0	0	0	0	0	0	0	0	0.00173232	0	0	0	0	0
Bacteria	p__Acidobacteriota	c__Acidobacteriae	o__Bryobacterales	0	0	0	0.00173169	0	0	0	0	0	0	0	0	0	0
Bacteria	p__Acidobacteriota	c__Blastocatellia	o__Pyrinomonadales	0	0	0	0	0.00170258	0	0	0	0	0	0	0	0	0
Bacteria	p__Proteobacteria	c__Alphaproteobacteria	o__Reyranellales	0	0	0	0.000967709	0.000638468	0	0	0	0	0	0	0	0	0
Bacteria	p__Actinobacteriota	c__Acidimicrobiia	o__IMCC26256	0	0	0	0.00157889	0	0	0	0	0	0	0	0	0	0
Bacteria	p__Actinobacteriota	c__Thermoleophilia	o__Solirubrobacterales	0	0	0	0.00157889	0	0	0	0	0	0	0	0	0	0
Bacteria	p__Chloroflexota	c__Limnocylindria	o__Limnocylindrales	0	0	0	0.00147703	0	0	0	0	0	0	0	0	0	0
Bacteria	p__Firmicutes	c__Clostridia	o__Unidentified	0	0	0	0.0014261	0	0	0	0	0	0	0	0	0	0
Bacteria	p__Myxococcota	c__Polyangia	o__Haliangiales	0	0	0	0	0.00133014	0	0	0	0	0	0	0	0	0
Bacteria	p__Actinobacteriota	c__UBA4738	o__UBA4738	0	0	0	0.00132423	0	0	0	0	0	0	0	0	0	0
Bacteria	p__Firmicutes	c__Bacilli	o__ML615J-28	0	0	0	0.00106957	0	0	0	0	0	0	0	0	0	0
Bacteria	p__Verrucomicrobiota	c__Verrucomicrobiae	o__Verrucomicrobiales	0	0	0	0	0	0	0	0	0.00102656	0	0	0	0	0
Bacteria	p__Myxococcota	c__Polyangia	o__Polyangiales	0	0	0	0.000356524	0	0	0	0	0	0	0.000486429	0	0	0
Bacteria	p__Proteobacteria	c__Gammaproteobacteria	o__Legionellales	0	0	0	0	0	0	0	0	0.000834082	0	0	0	0	0
Bacteria	p__Chloroflexota	c__Anaerolineae	o__Aggregatilineales	0	0	0	0	0.000798085	0	0	0	0	0	0	0	0	0
Bacteria	p__Actinobacteriota	c__Coriobacteriia	o__Coriobacteriales	0	0	0	0.000662117	0	0	0	0	0	0	0	0	0	0
Bacteria	p__Actinobacteriota	c__Acidimicrobiia	o__Acidimicrobiales	0	0	0.000520246	0	0	0	0	0	0	0	0	0	0	0
Bacteria	p__Actinobacteriota	c__Geothermincolia	o__Geothermincolales	0.000140756	0	0	0	0	0	0	0	0	0	0	0	0	0

## Sheet: %Family
Kingdom	Phylum	Class	Order	Family	T1-R	T1-S	T2-R	T2-S	T3-R	T3-S	T4-R	T4-S	T5-R	T5-S	T6-R	T6-S	T7-R	T7-S
Bacteria	p__Proteobacteria	c__Gammaproteobacteria	o__Enterobacterales	f__Enterobacteriaceae	0.231191	0.200968	0.0519379	0.0778242	0.284597	0.199001	0.0906329	0.396304	0.0422174	0.176559	0.0142037	0.237654	0.0133067	0.187309
Bacteria	p__Proteobacteria	c__Alphaproteobacteria	o__Sphingomonadales	f__Sphingomonadaceae	0.105215	0.0989952	0.127374	0.0624427	0.093908	0.0350679	0.184154	0.266684	0.266714	0.0818933	0.223757	0.0709877	0.353293	0.165592
Bacteria	p__Proteobacteria	c__Gammaproteobacteria	o__Burkholderiales	f__Burkholderiaceae	0.200906	0	0.369462	0.118723	0.130726	0.016497	0.239978	0.0372241	0.0763506	0.0206612	0.201965	0.0308642	0.239521	0.0149304
Bacteria	p__Proteobacteria	c__Alphaproteobacteria	o__Rhizobiales	f__Rhizobiaceae	0.0738264	0	0.0917368	0.0792503	0.128651	0.00254525	0.129874	0.0155544	0.206596	0	0.169277	0	0.149225	0.021717
Bacteria	p__Proteobacteria	c__Gammaproteobacteria	o__Burkholderiales	f__Neisseriaceae	0	0.158541	0	0.0318325	0	0.11529	0.000796773	0.00717894	0.0100731	0.130729	0.00282129	0.117284	0	0.108246
Bacteria	p__Firmicutes	c__Bacilli	o__Lactobacillales	f__Streptococcaceae	0.000516105	0.0904354	0	0.0222064	0	0.099359	0	0.0122973	0.00449121	0.0909091	0.00165386	0.12037	0	0.0743129
Bacteria	p__Proteobacteria	c__Gammaproteobacteria	o__Enterobacterales	f__Pasteurellaceae	0	0.109788	0	0.01421	0	0.0874811	0	0	0.00532529	0.109316	0	0.114198	0	0.0743129
Bacteria	p__Actinobacteriota	c__Actinomycetia	o__Streptomycetales	f__Streptomycetaceae	0.0346025	0	0.133703	0.00432922	0.0434158	0	0.12599	0	0.0143719	0	0.0502967	0	0.0530368	0
Bacteria	p__Proteobacteria	c__Alphaproteobacteria	o__Rhizobiales	f__Xanthobacteraceae	0.0492646	0	0.0512443	0.0208821	0.0160149	0	0.0465116	0.00339006	0.127807	0	0.0706294	0	0.0382093	0.0176451
Bacteria	p__Bacteroidota	c__Bacteroidia	o__Bacteroidales	f__Bacteroidaceae	0	0.0584295	0	0.0803199	0	0.0646682	0	0.0534432	0.00288721	0.0642374	0	0	0	0.022735
Bacteria	p__Actinobacteriota	c__Actinomycetia	o__Actinomycetales	f__Micrococcaceae	0.0157177	0.0279122	0.0229775	0.0144138	0.0774142	0.0171569	0.0159355	0	0.0619145	0.0338092	0.029283	0	0	0.0145911
Bacteria	p__Firmicutes	c__Clostridia	o__Peptostreptococcales	f__Peptostreptococcaceae	0	0.06885	0	0.0323419	0	0.0762632	0	0.0276522	0.00295137	0.0195342	0	0	0	0.0542925
Bacteria	p__Proteobacteria	c__Alphaproteobacteria	o__Caulobacterales	f__Caulobacteraceae	0.038051	0	0.022544	0.0283182	0.0226656	0	0.0276879	0.015222	0.0274605	0.0052592	0.0316179	0	0.0401103	0.00373261
Bacteria	p__Firmicutes	c__Negativicutes	o__Veillonellales	f__Veillonellaceae	0.000211134	0.0442873	0	0.00926963	0	0.0216817	0	0	0.00320801	0.0341848	0.000972857	0.0802469	0.000380192	0.0261283
Bacteria	p__Actinobacteriota	c__Actinomycetia	o__Mycobacteriales	f__Pseudonocardiaceae	0.00933681	0	0.041533	0	0.0146316	0	0.0472586	0	0	0	0.0529234	0	0.021861	0
Bacteria	p__Firmicutes	c__Bacilli	o__Haloplasmatales	f__Turicibacteraceae	0	0	0	0.0188449	0	0.0135747	0	0.00850838	0	0.0345605	0.000778286	0.0679012	0	0.0400407
Bacteria	p__Proteobacteria	c__Gammaproteobacteria	o__Enterobacterales	f__Vibrionaceae	0.132991	0	0	0	0.0343708	0	0	0	0	0	0	0	0	0
Bacteria	p__Proteobacteria	c__Alphaproteobacteria	o__Rhizobiales	f__Beijerinckiaceae	0.010674	0	0.0396254	0.00336152	0.0269753	0	0.0088641	0.00113002	0	0	0.0570094	0	0.0160631	0
Bacteria	p__Firmicutes	c__Bacilli	o__Lactobacillales	f__Aerococcaceae	0	0.0327503	0	0.00570439	0	0.0278092	0	0	0	0.0386927	0	0	0	0.023753
Bacteria	p__Proteobacteria	c__Gammaproteobacteria	o__Xanthomonadales	f__Xanthomonadaceae	0.0104394	0	0.00294806	0.00560253	0.0392126	0	0.00378467	0.012962	0.00866162	0	0.00739372	0	0.00418211	0
Bacteria	p__Firmicutes	c__Bacilli	o__Lactobacillales	f__Enterococcaceae	0	0.00855973	0	0	0	0.0307315	0	0.0166179	0	0.0375657	0	0	0	0
Bacteria	p__Proteobacteria	c__Alphaproteobacteria	o__Rhizobiales	f__Devosiaceae	0.00624018	0	0.00711003	0	0.016813	0	0.00438225	0	0.0253433	0	0.0227649	0	0.00722365	0
Bacteria	p__Bacteroidota	c__Bacteroidia	o__Chitinophagales	f__Chitinophagaceae	0.0131841	0	0.0110119	0.0025466	0.00425645	0.00254525	0.0161347	0	0.0107147	0	0.00330771	0	0.0233818	0
Bacteria	p__Firmicutes	c__Bacilli	o__Lactobacillales	f__Lactobacillaceae	0.000164215	0.00744325	0	0.00606091	0.000798085	0.0292232	0	0.0271204	0	0.0157776	0	0	0	0
Bacteria	p__Firmicutes	c__Clostridia	o__Lachnospirales	f__Lachnospiraceae	0	0	0	0.00769074	0	0.0246041	0	0.0130949	0	0	0	0.0216049	0	0.0176451
Bacteria	p__Nitrospinota	c__UBA7883	o__UBA7883	f__JADGCD01	0.00326084	0	0	0.00259753	0	0.0106523	0	0	0	0.054846	0	0	0	0
Bacteria	p__Desulfobacterota	c__Desulfovibrionia	o__Desulfovibrionales	f__Desulfovibrionaceae	0	0	0	0.00590812	0	0	0	0.00332358	0	0	0	0.058642	0	0
Bacteria	p__Firmicutes	c__Bacilli	o__Staphylococcales	f__Gemellaceae	0	0	0	0.00468575	0	0.0244155	0	0	0	0.025169	0	0	0	0.0084832
Bacteria	p__Bacteroidota	c__Bacteroidia	o__Bacteroidales	f__Rikenellaceae	0	0	0	0.0115106	0	0	0	0.00425419	0	0	0	0.0462963	0	0
Bacteria	p__Firmicutes	c__Clostridia	o__Tissierellales	f__Peptoniphilaceae	0	0.00818757	0	0.00468575	0	0.0170626	0	0.000531773	0	0	0	0	0	0.0315575
Bacteria	p__Firmicutes	c__Clostridia	o__Oscillospirales	f__Oscillospiraceae	0	0	0	0.0180299	0	0	0	0.0193433	0	0	0	0	0	0.0213777
Bacteria	p__Proteobacteria	c__Gammaproteobacteria	o__Pseudomonadales	f__Moraxellaceae	0	0	0.00251452	0	0.0142059	0.00659879	0.00333649	0	0.00609521	0.00788881	0.00826929	0	0	0.00780455
Bacteria	p__Proteobacteria	c__Gammaproteobacteria	o__Burkholderiales	f__Methylophilaceae	0.0192836	0	0	0	0.00154296	0.000282805	0.0126488	0	0.00230977	0	0	0	0.0121661	0.00610791
Bacteria	p__Proteobacteria	c__Gammaproteobacteria	o__Pseudomonadales	f__Pseudomonadaceae	0.00107913	0	0.00164745	0.00366711	0.00462889	0.00791855	0	0	0.0253433	0	0	0	0	0.00746522
Bacteria	p__Firmicutes	c__Clostridia	o__TANB77	f__CAG-508	0	0.0301451	0	0.00799633	0	0	0	0.0079766	0	0	0	0	0	0
Bacteria	p__Bacteroidota	c__Bacteroidia	o__Cytophagales	f__Spirosomaceae	0.000539564	0	0	0	0.00723597	0	0	0	0.0210445	0	0.0160521	0	0	0
Bacteria	p__Firmicutes	c__Negativicutes	o__Acidaminococcales	f__Acidaminococcaceae	0	0	0	0.00305592	0	0	0	0.00245945	0	0	0	0.0339506	0	0
Bacteria	p__Bacteroidota	c__Bacteroidia	o__Bacteroidales	f__Porphyromonadaceae	0	0	0	0.00305592	0	0.02319	0	0	0.00301553	0	0	0	0	0.00950119
Bacteria	p__Patescibacteria	c__Saccharimonadia	o__Saccharimonadales	f__UBA4665	0.00281512	0	0.00251452	0	0.00180899	0	0.012101	0	0.00224561	0	0.0123553	0	0.00484745	0
Bacteria	p__Firmicutes	c__Clostridia	o__Oscillospirales	f__Ruminococcaceae	0	0	0	0.0291331	0	0	0	0.00584951	0	0	0	0	0	0
Bacteria	p__Bacteroidota	c__Bacteroidia	o__Flavobacteriales	f__Weeksellaceae	0	0.00930406	0.0011272	0.00825099	0.00260708	0	0	0	0	0	0.00739372	0	0	0.0023753
Bacteria	p__Bacteroidota	c__Bacteroidia	o__Bacteroidales	f__Muribaculaceae	0	0	0	0.0166548	0	0	0	0	0	0	0	0	0	0.00644723
Bacteria	p__Chloroflexota	c__Chloroflexia	o__Chloroflexales	f__Roseiflexaceae	0.00159523	0	0.00390185	0	0	0	0.00542802	0	0	0	0	0	0.0107404	0
Bacteria	p__Actinobacteriota	c__Actinomycetia	o__Streptosporangiales	f__Streptosporangiaceae	0	0	0	0.00392177	0	0	0.0164334	0	0	0	0	0	0	0
Bacteria	p__Bacteroidota	c__Bacteroidia	o__Flavobacteriales	f__Flavobacteriaceae	0	0	0	0.00178262	0	0	0	0	0.00686514	0	0	0	0	0.0105192
Bacteria	p__Proteobacteria	c__Alphaproteobacteria	o__Unidentified	f__Unidentified	0.0176179	0	0	0	0	0	0	0	0	0	0	0	0	0
Bacteria	p__Proteobacteria	c__Alphaproteobacteria	o__Rhodobacterales	f__Rhodobacteraceae	0	0	0.00242782	0	0.00548018	0	0	0	0.00923906	0	0	0	0	0
Bacteria	p__Actinobacteriota	c__Actinomycetia	o__Actinomycetales	f__Actinomycetaceae	0	0	0	0.00152796	0	0.00160256	0	0	0	0.013148	0	0	0	0
Bacteria	p__Patescibacteria	c__Saccharimonadia	o__Saccharimonadales	f__UBA1020	0.00499683	0	0	0	0.00154296	0	0.00368508	0	0.00320801	0	0	0	0.0021861	0
Bacteria	p__Deinococcota	c__Deinococci	o__Deinococcales	f__Deinococcaceae	0.00194712	0	0.00182086	0	0	0	0	0	0	0	0.00807472	0	0.00275639	0
Bacteria	p__Proteobacteria	c__Gammaproteobacteria	o__Enterobacterales	f__Succinivibrionaceae	0	0	0	0	0	0	0	0	0	0	0	0	0	0.0142518
Bacteria	p__Campylobacterota	c__Campylobacteria	o__Campylobacterales	f__Campylobacteraceae	0	0	0	0.00275033	0	0.0111237	0	0	0	0	0	0	0	0
Bacteria	p__Firmicutes	c__Clostridia	o__Clostridiales	f__Clostridiaceae	0	0	0	0.00718142	0	0	0	0.00651422	0	0	0	0	0	0
Bacteria	p__Firmicutes	c__Bacilli	o__Acholeplasmatales	f__Anaeroplasmataceae	0	0.0133978	0	0	0	0	0	0	0	0	0	0	0	0
Bacteria	p__Firmicutes	c__Negativicutes	o__Selenomonadales	f__Selenomonadaceae	0	0	0	0.00224101	0	0	0	0.0049189	0	0.0052592	0	0	0	0
Bacteria	p__Bacteroidota	c__Bacteroidia	o__Sphingobacteriales	f__Sphingobacteriaceae	0.00185329	0	0	0	0.00696994	0	0.000398387	0	0.0012832	0	0	0	0.00152077	0
Bacteria	p__Actinobacteriota	c__Actinomycetia	o__Mycobacteriales	f__Mycobacteriaceae	0	0	0	0.0119181	0	0	0	0	0	0	0	0	0	0
Bacteria	p__Proteobacteria	c__Alphaproteobacteria	o__Rhizobiales	f__Hyphomicrobiaceae	0.000821076	0	0	0.00631558	0.00409683	0	0	0	0	0	0	0	0	0
Bacteria	p__Bacteroidota	c__Bacteroidia	o__Bacteroidales	f__Unidentified	0	0	0	0.00275033	0	0	0	0.00438713	0	0	0	0	0	0.00407194
Bacteria	p__Actinobacteriota	c__Actinomycetia	o__Mycobacteriales	f__Micromonosporaceae	0	0	0	0.00886218	0	0	0	0	0.00211728	0	0	0	0	0
Bacteria	p__Actinobacteriota	c__Actinomycetia	o__Actinomycetales	f__Microbacteriaceae	0	0	0.00390185	0	0.000638468	0	0	0	0	0	0.00593443	0	0	0
Bacteria	p__Proteobacteria	c__Unidentified	o__Unidentified	f__Unidentified	0.00412884	0	0	0.00595905	0	0	0	0	0	0	0	0	0	0
Bacteria	p__Desulfobacterota	c__Binatia	o__UBA9968	f__UBA9968	0	0	0	0.00616278	0	0.00377074	0	0	0	0	0	0	0	0
Bacteria	p__Firmicutes	c__Bacilli	o__Exiguobacterales	f__Exiguobacteraceae	0	0	0.00329489	0	0.00542698	0	0	0	0.000641601	0	0	0	0	0
Bacteria	p__Bacteroidota	c__Bacteroidia	o__Bacteroidales	f__Marinifilaceae	0	0	0	0.00392177	0	0	0	0.00498538	0	0	0	0	0	0
Bacteria	p__Fusobacteriota	c__Fusobacteriia	o__Fusobacteriales	f__Fusobacteriaceae	0	0	0	0.00677396	0	0	0	0	0	0	0	0	0	0.00203597
Bacteria	p__Firmicutes	c__Bacilli	o__Staphylococcales	f__Staphylococcaceae	0	0	0	0.00865845	0	0	0	0	0	0	0	0	0	0
Bacteria	p__Proteobacteria	c__Gammaproteobacteria	o__Unidentified	f__Unidentified	0	0.00855973	0	0	0	0	0	0	0	0	0	0	0	0
Bacteria	p__Actinobacteriota	c__Unidentified	o__Unidentified	f__Unidentified	0	0	0	0	0	0.0035822	0	0.00478596	0	0	0	0	0	0
Bacteria	p__Firmicutes	c__Bacilli	o__Bacillales	f__Bacillaceae	0.000469186	0	0	0.00789447	0	0	0	0	0	0	0	0	0	0
Bacteria	p__Bacteroidota	c__Bacteroidia	o__Bacteroidales	f__UBA932	0	0	0	0	0	0	0	0.00830896	0	0	0	0	0	0
Bacteria	p__Gemmatimonadota	c__Gemmatimonadetes	o__Gemmatimonadales	f__Gemmatimonadaceae	0.00032843	0	0	0.00789447	0	0	0	0	0	0	0	0	0	0
Bacteria	p__Bacteroidota	c__Bacteroidia	o__Bacteroidales	f__Tannerellaceae	0	0	0	0.00646837	0	0	0	0.00166179	0	0	0	0	0	0
Bacteria	p__Firmicutes	c__Clostridia	o__Oscillospirales	f__Acutalibacteraceae	0	0.00483811	0	0.00198635	0	0	0	0.00119649	0	0	0	0	0	0
Bacteria	p__Bdellovibrionota	c__Bdellovibrionia	o__Bdellovibrionales	f__Bdellovibrionaceae	0.00239285	0	0	0	0	0	0	0	0	0	0.000778286	0	0.00484745	0
Bacteria	p__Firmicutes	c__Bacilli	o__Erysipelotrichales	f__Erysipelotrichaceae	0	0	0	0.00662117	0	0	0	0.000265887	0	0	0	0	0	0.00101798
Bacteria	p__Actinobacteriota	c__Actinomycetia	o__Unidentified	f__Unidentified	0	0	0	0.00774167	0	0	0	0	0	0	0	0	0	0
Bacteria	p__Proteobacteria	c__Alphaproteobacteria	o__Rhizobiales	f__Methyloligellaceae	0	0	0	0.00753794	0	0	0	0	0	0	0	0	0	0
Bacteria	p__Acidobacteriota	c__Vicinamibacteria	o__Vicinamibacterales	f__UBA2999	0	0	0	0.00748701	0	0	0	0	0	0	0	0	0	0
Bacteria	p__Bacteroidota	c__Bacteroidia	o__Bacteroidales	f__Barnesiellaceae	0	0	0	0.00687583	0	0	0	0	0	0	0	0	0	0
Bacteria	p__Actinobacteriota	c__Actinomycetia	o__Propionibacteriales	f__Propionibacteriaceae	0	0.00446595	0	0.00173169	0	0	0	0	0	0	0	0	0	0
Bacteria	p__Proteobacteria	c__Gammaproteobacteria	o__Burkholderiales	f__Usitatibacteraceae	0	0.0059546	0	0	0	0	0	0	0	0	0	0	0	0
Bacteria	p__Bacteroidota	c__Bacteroidia	o__Unidentified	f__Unidentified	0	0	0	0.00590812	0	0	0	0	0	0	0	0	0	0
Bacteria	p__Actinobacteriota	c__Actinomycetia	o__Propionibacteriales	f__Nocardioidaceae	0.000985291	0	0.00164745	0.00168076	0	0	0.00159355	0	0	0	0	0	0	0
Bacteria	p__Proteobacteria	c__Gammaproteobacteria	o__Steroidobacterales	f__Steroidobacteraceae	0.00035189	0	0.000867077	0	0.00117052	0	0	0	0.00237393	0	0	0	0.00114058	0
Bacteria	p__Firmicutes	c__Bacilli	o__Erysipelotrichales	f__Coprobacillaceae	0	0	0	0.00580625	0	0	0	0	0	0	0	0	0	0
Bacteria	p__Proteobacteria	c__Alphaproteobacteria	o__Azospirillales	f__Azospirillaceae	0.00136064	0	0	0	0	0	0	0	0.00384961	0	0	0	0	0
Archaea	p__Thermoproteota	c__Bathyarchaeia	o__B26-1	f__UBA233	0	0	0	0	0	0.0050905	0	0	0	0	0	0	0	0
Bacteria	p__CSP1-3	c__CSP1-3	o__CSP1-3	f__NP-7	0	0	0	0	0	0.0050905	0	0	0	0	0	0	0	0
Bacteria	p__Proteobacteria	c__Gammaproteobacteria	o__Pseudomonadales	f__Cellvibrionaceae	0	0	0	0	0	0.00499623	0	0	0	0	0	0	0	0
Bacteria	p__Bacteroidota	c__Bacteroidia	o__Cytophagales	f__Unidentified	0	0	0	0	0	0	0	0	0.00487617	0	0	0	0	0
Bacteria	p__Patescibacteria	c__Saccharimonadia	o__Saccharimonadales	f__Unidentified	0.000703779	0	0	0	0	0.00367647	0.000448185	0	0	0	0	0	0	0
Bacteria	p__Planctomycetota	c__Planctomycetia	o__Gemmatales	f__Gemmataceae	0	0	0	0.00453295	0	0	0	0	0	0	0	0	0	0
Bacteria	p__Acidobacteriota	c__Acidobacteriae	o__Acidobacteriales	f__Gp1-AA117	0	0	0	0.00443109	0	0	0	0	0	0	0	0	0	0
Bacteria	p__Nitrospirota	c__Nitrospiria	o__Nitrospirales	f__Nitrospiraceae	0	0	0	0.00432922	0	0	0	0	0	0	0	0	0	0
Bacteria	p__Firmicutes	c__Clostridia	o__Christensenellales	f__CAG-314	0	0	0	0.00407456	0	0	0	0	0	0	0	0	0	0
Bacteria	p__Firmicutes	c__Bacilli	o__RF39	f__UBA660	0	0.00148865	0	0.00249567	0	0	0	0	0	0	0	0	0	0
Archaea	p__Halobacteriota	c__Methanosarcinia	o__Methanotrichales	f__Methanotrichaceae	0	0	0	0.00392177	0	0	0	0	0	0	0	0	0	0
Bacteria	p__Firmicutes	c__Unidentified	o__Unidentified	f__Unidentified	0	0	0	0.0038199	0	0	0	0	0	0	0	0	0	0
Bacteria	p__Chloroflexota	c__Chloroflexia	o__Chloroflexales	f__Unidentified	0	0	0	0	0.00159617	0	0	0	0.00218144	0	0	0	0	0
Bacteria	p__Actinobacteriota	c__Rubrobacteria	o__Rubrobacterales	f__Rubrobacteraceae	0	0.00372162	0	0	0	0	0	0	0	0	0	0	0	0
Bacteria	p__Chloroflexota	c__Ktedonobacteria	o__Ktedonobacterales	f__Ktedonobacteraceae	0	0	0	0.00356524	0	0	0	0	0	0	0	0	0	0
Bacteria	p__Firmicutes	c__Clostridia	o__Oscillospirales	f__Unidentified	0	0	0	0.00351431	0	0	0	0	0	0	0	0	0	0
Bacteria	p__Bdellovibrionota	c__Bdellovibrionia	o__UBA1018	f__UBA1018	0	0	0	0.00305592	0	0	0	0	0	0	0	0	0	0
Bacteria	p__Actinobacteriota	c__Thermoleophilia	o__Unidentified	f__Unidentified	0	0	0	0.00305592	0	0	0	0	0	0	0	0	0	0
Bacteria	p__Fusobacteriota	c__Fusobacteriia	o__Fusobacteriales	f__Leptotrichiaceae	0	0.0029773	0	0	0	0	0	0	0	0	0	0	0	0
Bacteria	p__CSP1-3	c__CSP1-3	o__CSP1-3	f__CSP1-3	0	0	0	0	0	0.00292232	0	0	0	0	0	0	0	0
Bacteria	p__Firmicutes	c__Bacilli	o__Paenibacillales	f__Paenibacillaceae	0	0	0	0.00280126	0	0	0	0	0	0	0	0	0	0
Bacteria	p__Myxococcota	c__Polyangia	o__Palsa-1104	f__Fen-1088	0	0	0	0.0025466	0	0	0	0	0	0	0	0	0	0
Bacteria	p__Firmicutes	c__Clostridia	o__Christensenellales	f__CAG-74	0	0	0	0.0025466	0	0	0	0	0	0	0	0	0	0
Bacteria	p__Firmicutes	c__Clostridia	o__Peptostreptococcales	f__Anaerovoracaceae	0	0	0	0.0025466	0	0	0	0	0	0	0	0	0	0
Bacteria	p__Synergistota	c__Synergistia	o__Synergistales	f__Aminobacteriaceae	0	0	0	0.00244474	0	0	0	0	0	0	0	0	0	0
Bacteria	p__CSP1-3	c__CSP1-3	o__CSP1-3	f__13-1-40CM-64-14	0	0	0	0	0	0.00235671	0	0	0	0	0	0	0	0
Bacteria	p__Acidobacteriota	c__Acidobacteriae	o__Unidentified	f__Unidentified	0	0	0	0.00234287	0	0	0	0	0	0	0	0	0	0
Bacteria	p__Chloroflexota	c__Unidentified	o__Unidentified	f__Unidentified	0	0	0	0	0	0.00216817	0	0	0	0	0	0	0	0
Bacteria	p__Proteobacteria	c__Alphaproteobacteria	o__RF32	f__CAG-239	0	0	0	0.00213915	0	0	0	0	0	0	0	0	0	0
Bacteria	p__Acidobacteriota	c__Vicinamibacteria	o__Vicinamibacterales	f__Vicinamibacteraceae	0	0	0	0	0.000798085	0	0	0	0.0012832	0	0	0	0	0
Bacteria	p__Planctomycetota	c__SZUA-567	o__SZUA-567	f__SZUA-567	0	0	0	0.00203728	0	0	0	0	0	0	0	0	0	0
Bacteria	p__Proteobacteria	c__Gammaproteobacteria	o__Burkholderiales	f__Unidentified	0	0	0	0.00188449	0	0	0	0	0	0	0	0	0	0
Bacteria	p__Verrucomicrobiota	c__Verrucomicrobiae	o__Opitutales	f__Opitutaceae	0	0	0.000606954	0	0	0	0.000647378	0	0.000577441	0	0	0	0	0
Bacteria	p__Planctomycetota	c__Phycisphaerae	o__Phycisphaerales	f__Unidentified	0	0	0	0	0	0	0	0	0.00173232	0	0	0	0	0
Bacteria	p__Acidobacteriota	c__Acidobacteriae	o__Bryobacterales	f__Bryobacteraceae	0	0	0	0.00173169	0	0	0	0	0	0	0	0	0	0
Bacteria	p__Acidobacteriota	c__Blastocatellia	o__Pyrinomonadales	f__Pyrinomonadaceae	0	0	0	0	0.00170258	0	0	0	0	0	0	0	0	0
Bacteria	p__Proteobacteria	c__Alphaproteobacteria	o__Reyranellales	f__Reyranellaceae	0	0	0	0.000967709	0.000638468	0	0	0	0	0	0	0	0	0
Bacteria	p__Actinobacteriota	c__Acidimicrobiia	o__IMCC26256	f__PALSA-555	0	0	0	0.00157889	0	0	0	0	0	0	0	0	0	0
Bacteria	p__Actinobacteriota	c__Thermoleophilia	o__Solirubrobacterales	f__Solirubrobacteraceae	0	0	0	0.00157889	0	0	0	0	0	0	0	0	0	0
Bacteria	p__Proteobacteria	c__Gammaproteobacteria	o__Burkholderiales	f__Rhodocyclaceae	0	0	0	0.00157889	0	0	0	0	0	0	0	0	0	0
Bacteria	p__Firmicutes	c__Clostridia	o__Oscillospirales	f__Butyricicoccaceae	0	0	0	0	0	0	0	0.00152885	0	0	0	0	0	0
Bacteria	p__Chloroflexota	c__Limnocylindria	o__Limnocylindrales	f__CSP1-4	0	0	0	0.00147703	0	0	0	0	0	0	0	0	0	0
Bacteria	p__Proteobacteria	c__Gammaproteobacteria	o__Burkholderiales	f__Casimicrobiaceae	0	0	0	0.00147703	0	0	0	0	0	0	0	0	0	0
Bacteria	p__Firmicutes	c__Clostridia	o__Unidentified	f__Unidentified	0	0	0	0.0014261	0	0	0	0	0	0	0	0	0	0
Bacteria	p__Firmicutes	c__Clostridia	o__Christensenellales	f__CAG-917	0	0	0	0	0	0	0	0.00139591	0	0	0	0	0	0
Bacteria	p__Bacteroidota	c__Bacteroidia	o__Cytophagales	f__Cyclobacteriaceae	0	0	0	0	0.00133014	0	0	0	0	0	0	0	0	0
Bacteria	p__Myxococcota	c__Polyangia	o__Haliangiales	f__Haliangiaceae	0	0	0	0	0.00133014	0	0	0	0	0	0	0	0	0
Bacteria	p__Actinobacteriota	c__UBA4738	o__UBA4738	f__HRBIN12	0	0	0	0.00132423	0	0	0	0	0	0	0	0	0	0
Bacteria	p__Proteobacteria	c__Gammaproteobacteria	o__Xanthomonadales	f__Rhodanobacteraceae	0	0	0	0	0	0	0.00129476	0	0	0	0	0	0	0
Bacteria	p__Firmicutes	c__Bacilli	o__ML615J-28	f__CAG-698	0	0	0	0.00106957	0	0	0	0	0	0	0	0	0	0
Bacteria	p__Firmicutes	c__Negativicutes	o__Veillonellales	f__Megasphaeraceae	0	0	0	0	0	0	0	0.00106355	0	0	0	0	0	0
Bacteria	p__Verrucomicrobiota	c__Verrucomicrobiae	o__Verrucomicrobiales	f__Akkermansiaceae	0	0	0	0	0	0	0	0	0.00102656	0	0	0	0	0
Bacteria	p__Actinobacteriota	c__Actinomycetia	o__Actinomycetales	f__Bifidobacteriaceae	0	0	0	0.000916777	0	0	0	0	0	0	0	0	0	0
Bacteria	p__Myxococcota	c__Polyangia	o__Polyangiales	f__Polyangiaceae	0	0	0	0.000356524	0	0	0	0	0	0	0.000486429	0	0	0
Bacteria	p__Proteobacteria	c__Gammaproteobacteria	o__Legionellales	f__Legionellaceae	0	0	0	0	0	0	0	0	0.000834082	0	0	0	0	0
Bacteria	p__Chloroflexota	c__Anaerolineae	o__Aggregatilineales	f__A4b	0	0	0	0	0.000798085	0	0	0	0	0	0	0	0	0
Bacteria	p__Patescibacteria	c__Saccharimonadia	o__Saccharimonadales	f__Saccharimonadaceae	0.000797617	0	0	0	0	0	0	0	0	0	0	0	0	0
Bacteria	p__Bacteroidota	c__Bacteroidia	o__Chitinophagales	f__LD1	0	0	0	0	0	0	0	0	0.000769922	0	0	0	0	0
Bacteria	p__Actinobacteriota	c__Coriobacteriia	o__Coriobacteriales	f__Eggerthellaceae	0	0	0	0.000662117	0	0	0	0	0	0	0	0	0	0
Bacteria	p__Bacteroidota	c__Bacteroidia	o__Bacteroidales	f__Dysgonomonadaceae	0	0	0	0	0	0	0	0.000598245	0	0	0	0	0	0
Bacteria	p__Actinobacteriota	c__Acidimicrobiia	o__Acidimicrobiales	f__Unidentified	0	0	0.000520246	0	0	0	0	0	0	0	0	0	0	0
Bacteria	p__Firmicutes	c__Clostridia	o__Christensenellales	f__Borkfalkiaceae	0	0	0	0	0	0	0	0.000265887	0	0	0	0	0	0
Bacteria	p__Actinobacteriota	c__Geothermincolia	o__Geothermincolales	f__RBG-13-55-18	0.000140756	0	0	0	0	0	0	0	0	0	0	0	0	0

## Sheet: %Genus
Kingdom	Phylum	Class	Order	Family	Genus	T1-R	T1-S	T2-R	T2-S	T3-R	T3-S	T4-R	T4-S	T5-R	T5-S	T6-R	T6-S	T7-R	T7-S
Bacteria	p__Proteobacteria	c__Alphaproteobacteria	o__Sphingomonadales	f__Sphingomonadaceae	g__Novosphingobium	0.0821076	0.0989952	0.0354635	0.0568911	0.0410215	0.0350679	0.129276	0.266684	0.21006	0.0818933	0.169083	0.0709877	0.255394	0.0536138
Bacteria	p__Proteobacteria	c__Gammaproteobacteria	o__Enterobacterales	f__Enterobacteriaceae	g__Klebsiella	0	0.136956	0	0.0296425	0	0.128488	0	0.00744483	0.0138586	0.149887	0	0.237654	0	0.124873
Bacteria	p__Proteobacteria	c__Gammaproteobacteria	o__Enterobacterales	f__Enterobacteriaceae	g__Escherichia	0	0.0640119	0	0.0399307	0	0.0705128	0	0.388859	0.00712178	0.0266717	0.00466971	0	0.0095048	0.0400407
Bacteria	p__Proteobacteria	c__Gammaproteobacteria	o__Burkholderiales	f__Neisseriaceae	g__Neisseria	0	0.141794	0	0.0294897	0	0.0987934	0.000796773	0.00717894	0.0100731	0.122464	0.00282129	0.117284	0	0.108246
Bacteria	p__Proteobacteria	c__Gammaproteobacteria	o__Burkholderiales	f__Burkholderiaceae	g__Unidentified	0.102376	0	0.0843666	0.0115616	0.0294759	0	0.0575669	0	0.0300269	0	0.0323961	0	0.164528	0.0149304
Bacteria	p__Proteobacteria	c__Gammaproteobacteria	o__Enterobacterales	f__Pasteurellaceae	g__Haemophilus	0	0.109788	0	0.01421	0	0.0874811	0	0	0.00532529	0.109316	0	0.114198	0	0.0743129
Bacteria	p__Firmicutes	c__Bacilli	o__Lactobacillales	f__Streptococcaceae	g__Streptococcus	0.000516105	0.0904354	0	0.0222064	0	0.099359	0	0.0122973	0.00449121	0.0909091	0.00165386	0.12037	0	0.0658297
Bacteria	p__Actinobacteriota	c__Actinomycetia	o__Streptomycetales	f__Streptomycetaceae	g__Streptomyces	0.0346025	0	0.133703	0.00315779	0.0434158	0	0.12599	0	0.0143719	0	0.0502967	0	0.0530368	0
Bacteria	p__Proteobacteria	c__Alphaproteobacteria	o__Rhizobiales	f__Rhizobiaceae	g__Agrobacterium	0.0255472	0	0.0382381	0	0.0631551	0	0.0218117	0	0.172976	0	0.0434867	0	0.0707157	0
Bacteria	p__Proteobacteria	c__Alphaproteobacteria	o__Rhizobiales	f__Xanthobacteraceae	g__Bradyrhizobium	0.0492646	0	0.0512443	0.00590812	0.0160149	0	0.0465116	0.00339006	0.127807	0	0.0706294	0	0.0382093	0.0176451
Bacteria	p__Proteobacteria	c__Gammaproteobacteria	o__Burkholderiales	f__Burkholderiaceae	g__Massilia	0.0336407	0	0.212347	0	0.0114924	0	0.0780838	0	0	0	0.073548	0	0	0
Bacteria	p__Proteobacteria	c__Gammaproteobacteria	o__Enterobacterales	f__Enterobacteriaceae	g__Cronobacter	0.119619	0	0.0383248	0	0.0389465	0	0.0406354	0	0.011613	0	0.009534	0	0.00380192	0.0223957
Bacteria	p__Proteobacteria	c__Alphaproteobacteria	o__Rhizobiales	f__Rhizobiaceae	g__Unidentified	0.028245	0	0.0384982	0.0110523	0.0654961	0	0.0254469	0	0.0336199	0	0.017706	0	0.0255679	0.021717
Bacteria	p__Firmicutes	c__Clostridia	o__Peptostreptococcales	f__Peptostreptococcaceae	g__Unidentified	0	0.06885	0	0.0249567	0	0.0668363	0	0.0276522	0.00295137	0.0195342	0	0	0	0.0542925
Bacteria	p__Proteobacteria	c__Gammaproteobacteria	o__Enterobacterales	f__Enterobacteriaceae	g__Enterobacter	0.111572	0	0	0	0.134238	0	0	0	0.00962402	0	0	0	0	0
Bacteria	p__Proteobacteria	c__Alphaproteobacteria	o__Sphingomonadales	f__Sphingomonadaceae	g__Unidentified	0.00835151	0	0.0524582	0	0.0291567	0	0.0403366	0	0.0447196	0	0.0546746	0	0.0049425	0
Bacteria	p__Firmicutes	c__Negativicutes	o__Veillonellales	f__Veillonellaceae	g__Veillonella	0.000211134	0.0442873	0	0.00926963	0	0.0216817	0	0	0.00320801	0.0341848	0.000972857	0.0802469	0.000380192	0.0261283
Bacteria	p__Proteobacteria	c__Alphaproteobacteria	o__Sphingomonadales	f__Sphingomonadaceae	g__Sphingomonas	0	0	0.039452	0	0.0124501	0	0.0145411	0	0	0	0	0	0.029655	0.111978
Bacteria	p__Firmicutes	c__Bacilli	o__Haloplasmatales	f__Turicibacteraceae	g__Turicibacter	0	0	0	0.0188449	0	0.0135747	0	0.00850838	0	0.0345605	0.000778286	0.0679012	0	0.0400407
Bacteria	p__Proteobacteria	c__Alphaproteobacteria	o__Rhizobiales	f__Rhizobiaceae	g__Rhizobium	0.0155301	0	0.00728345	0	0	0	0.0640406	0	0	0	0.0495184	0	0.0405855	0
Bacteria	p__Bacteroidota	c__Bacteroidia	o__Bacteroidales	f__Bacteroidaceae	g__Alloprevotella	0	0.0584295	0	0.0218499	0	0.0277149	0	0.00285828	0.00288721	0.0368144	0	0	0	0.022735
Bacteria	p__Proteobacteria	c__Gammaproteobacteria	o__Burkholderiales	f__Burkholderiaceae	g__Schlegelella	0.00574753	0	0.0329489	0.00290313	0.0178239	0	0.0258951	0	0.0094957	0	0	0.0308642	0.043627	0
Bacteria	p__Proteobacteria	c__Gammaproteobacteria	o__Enterobacterales	f__Vibrionaceae	g__Vibrio	0.132991	0	0	0	0.0343708	0	0	0	0	0	0	0	0	0
Bacteria	p__Actinobacteriota	c__Actinomycetia	o__Actinomycetales	f__Micrococcaceae	g__Unidentified	0.0157177	0	0.0229775	0.00580625	0.0586326	0	0.0159355	0	0.0347748	0	0	0	0	0
Bacteria	p__Proteobacteria	c__Gammaproteobacteria	o__Burkholderiales	f__Burkholderiaceae	g__Comamonas	0	0	0	0.0844453	0	0.016497	0	0.0372241	0	0.0101427	0	0	0	0
Bacteria	p__Proteobacteria	c__Alphaproteobacteria	o__Caulobacterales	f__Caulobacteraceae	g__Asticcacaulis	0.0247496	0	0.022544	0	0.0122905	0	0.0220607	0	0.0151418	0	0.00865843	0	0.0250927	0
Bacteria	p__Proteobacteria	c__Gammaproteobacteria	o__Enterobacterales	f__Enterobacteriaceae	g__Unidentified	0	0	0.0136131	0	0.111413	0	0	0	0	0	0	0	0	0
Bacteria	p__Proteobacteria	c__Gammaproteobacteria	o__Burkholderiales	f__Burkholderiaceae	g__Noviherbaspirillum	0.00485608	0	0.0397988	0.00275033	0.0283054	0	0.0387929	0	0	0	0	0	0.00389697	0
Bacteria	p__Proteobacteria	c__Gammaproteobacteria	o__Burkholderiales	f__Burkholderiaceae	g__Pelomonas	0.0306848	0	0	0.00733422	0	0	0.0396395	0	0	0	0.0368713	0	0	0
Bacteria	p__Actinobacteriota	c__Actinomycetia	o__Mycobacteriales	f__Pseudonocardiaceae	g__Lentzea	0.0073193	0	0.0117922	0	0.00936419	0	0.0243016	0	0	0	0.0345364	0	0.015873	0
Bacteria	p__Actinobacteriota	c__Actinomycetia	o__Actinomycetales	f__Micrococcaceae	g__Rothia	0	0.0279122	0	0.00860752	0	0.0171569	0	0	0	0.0338092	0	0	0	0.0145911
Bacteria	p__Proteobacteria	c__Alphaproteobacteria	o__Rhizobiales	f__Beijerinckiaceae	g__Bosea	0.00703779	0	0.00693662	0	0.0269753	0	0	0	0	0	0.0489347	0	0.0103602	0
Bacteria	p__Firmicutes	c__Bacilli	o__Lactobacillales	f__Enterococcaceae	g__Enterococcus	0	0.00855973	0	0	0	0.0307315	0	0.016485	0	0.0375657	0	0	0	0
Bacteria	p__Firmicutes	c__Bacilli	o__Lactobacillales	f__Aerococcaceae	g__Granulicatella	0	0.0327503	0	0	0	0.0053733	0	0	0	0.0281743	0	0	0	0.023753
Bacteria	p__Proteobacteria	c__Alphaproteobacteria	o__Rhizobiales	f__Rhizobiaceae	g__Ochrobactrum	0	0	0	0.068198	0	0.00254525	0	0.0155544	0	0	0	0	0	0
Bacteria	p__Proteobacteria	c__Alphaproteobacteria	o__Rhizobiales	f__Devosiaceae	g__Devosia	0.00624018	0	0.00711003	0	0.016813	0	0.00438225	0	0.0253433	0	0.0227649	0	0	0
Bacteria	p__Actinobacteriota	c__Actinomycetia	o__Mycobacteriales	f__Pseudonocardiaceae	g__Amycolatopsis	0.0020175	0	0.0297407	0	0.00526736	0	0.0185748	0	0	0	0.018387	0	0.00598802	0
Bacteria	p__Proteobacteria	c__Alphaproteobacteria	o__Sphingomonadales	f__Sphingomonadaceae	g__Sphingomicrobium	0.0147559	0	0	0	0	0	0	0	0	0	0	0	0.063302	0
Bacteria	p__Actinobacteriota	c__Actinomycetia	o__Actinomycetales	f__Micrococcaceae	g__Paenarthrobacter	0	0	0	0	0.0187816	0	0	0	0.0271397	0	0.029283	0	0	0
Bacteria	p__Nitrospinota	c__UBA7883	o__UBA7883	f__JADGCD01	g__JADGCD01	0.00326084	0	0	0.00259753	0	0.0106523	0	0	0	0.054846	0	0	0	0
Bacteria	p__Proteobacteria	c__Gammaproteobacteria	o__Burkholderiales	f__Burkholderiaceae	g__Pseudoduganella	0.00638093	0	0	0.00249567	0	0	0	0	0	0.0105184	0.0461134	0	0	0
Bacteria	p__Firmicutes	c__Bacilli	o__Staphylococcales	f__Gemellaceae	g__Gemella	0	0	0	0.00468575	0	0.0244155	0	0	0	0.025169	0	0	0	0.0084832
Bacteria	p__Desulfobacterota	c__Desulfovibrionia	o__Desulfovibrionales	f__Desulfovibrionaceae	g__Unidentified	0	0	0	0	0	0	0	0.00332358	0	0	0	0.058642	0	0
Bacteria	p__Proteobacteria	c__Alphaproteobacteria	o__Caulobacterales	f__Caulobacteraceae	g__Brevundimonas	0.00236939	0	0	0.0283182	0.00351157	0	0	0.015222	0	0.0052592	0	0	0	0.00373261
Bacteria	p__Proteobacteria	c__Gammaproteobacteria	o__Enterobacterales	f__Enterobacteriaceae	g__Pantoea	0	0	0	0.00825099	0	0	0.0499975	0	0	0	0	0	0	0
Bacteria	p__Bacteroidota	c__Bacteroidia	o__Bacteroidales	f__Bacteroidaceae	g__Phocaeicola	0	0	0	0.0235815	0	0	0	0.0341	0	0	0	0	0	0
Bacteria	p__Proteobacteria	c__Alphaproteobacteria	o__Rhizobiales	f__Rhizobiaceae	g__Ensifer	0	0	0	0	0	0	0.0088641	0	0	0	0.0474754	0	0	0
Bacteria	p__Bacteroidota	c__Bacteroidia	o__Bacteroidales	f__Bacteroidaceae	g__Prevotella	0	0	0	0.0132933	0	0.0369532	0	0.00452007	0	0	0	0	0	0
Bacteria	p__Proteobacteria	c__Gammaproteobacteria	o__Burkholderiales	f__Methylophilaceae	g__Unidentified	0.0192836	0	0	0	0.00154296	0.000282805	0.0126488	0	0.00230977	0	0	0	0.0121661	0.00610791
Bacteria	p__Bacteroidota	c__Bacteroidia	o__Bacteroidales	f__Rikenellaceae	g__Alistipes	0	0	0	0.00366711	0	0	0	0.00425419	0	0	0	0.0462963	0	0
Bacteria	p__Firmicutes	c__Bacilli	o__Lactobacillales	f__Lactobacillaceae	g__Lactobacillus	0.000164215	0.00744325	0	0.00606091	0	0	0	0.0244616	0	0.0157776	0	0	0	0
Bacteria	p__Proteobacteria	c__Alphaproteobacteria	o__Rhizobiales	f__Beijerinckiaceae	g__Methylobacterium	0.0028855	0	0.0326888	0	0	0	0.0088641	0.00113002	0	0	0.00807472	0	0	0
Bacteria	p__Firmicutes	c__Clostridia	o__Tissierellales	f__Peptoniphilaceae	g__Parvimonas	0	0.00818757	0	0.00468575	0	0.00857843	0	0.000531773	0	0	0	0	0	0.0315575
Bacteria	p__Proteobacteria	c__Alphaproteobacteria	o__Caulobacterales	f__Caulobacteraceae	g__Caulobacter	0.00795271	0	0	0	0	0	0.00562721	0	0.0123187	0	0.0229594	0	0.00361182	0
Bacteria	p__Proteobacteria	c__Gammaproteobacteria	o__Pseudomonadales	f__Pseudomonadaceae	g__Pseudomonas	0.00107913	0	0.00164745	0.00366711	0.00462889	0.00791855	0	0	0.0253433	0	0	0	0	0.00746522
Bacteria	p__Proteobacteria	c__Gammaproteobacteria	o__Xanthomonadales	f__Xanthomonadaceae	g__Stenotrophomonas	0.0020175	0	0	0.00560253	0.0221335	0	0	0.012962	0.00481201	0	0	0	0	0
Bacteria	p__Firmicutes	c__Clostridia	o__Lachnospirales	f__Lachnospiraceae	g__Unidentified	0	0	0	0.00448202	0	0.0234729	0	0.00132943	0	0	0	0	0	0.0176451
Bacteria	p__Proteobacteria	c__Alphaproteobacteria	o__Rhizobiales	f__Rhizobiaceae	g__Mesorhizobium	0.00450419	0	0.00771699	0	0	0	0.00971067	0	0	0	0.0110906	0	0.0123562	0
Bacteria	p__Bacteroidota	c__Bacteroidia	o__Cytophagales	f__Spirosomaceae	g__Dyadobacter	0.000539564	0	0	0	0.00723597	0	0	0	0.0210445	0	0.0160521	0	0	0
Bacteria	p__Proteobacteria	c__Gammaproteobacteria	o__Burkholderiales	f__Neisseriaceae	g__Eikenella	0	0.0167473	0	0.00234287	0	0.016497	0	0	0	0.00826446	0	0	0	0
Bacteria	p__Proteobacteria	c__Gammaproteobacteria	o__Pseudomonadales	f__Moraxellaceae	g__Acinetobacter	0	0	0.00251452	0	0.0142059	0	0.00333649	0	0.00609521	0.00788881	0.00826929	0	0	0
Bacteria	p__Proteobacteria	c__Gammaproteobacteria	o__Burkholderiales	f__Burkholderiaceae	g__Variovorax	0	0	0	0	0.0183559	0	0	0	0.0227769	0	0	0	0	0
Bacteria	p__Firmicutes	c__Negativicutes	o__Acidaminococcales	f__Acidaminococcaceae	g__CAG-266	0	0	0	0.00305592	0	0	0	0.00245945	0	0	0	0.0339506	0	0
Bacteria	p__Bacteroidota	c__Bacteroidia	o__Bacteroidales	f__Porphyromonadaceae	g__Porphyromonas	0	0	0	0.00305592	0	0.02319	0	0	0.00301553	0	0	0	0	0.00950119
Bacteria	p__Proteobacteria	c__Gammaproteobacteria	o__Xanthomonadales	f__Xanthomonadaceae	g__Lysobacter	0.00842189	0	0.00294806	0	0.00617185	0	0.00378467	0	0.00384961	0	0.00739372	0	0.00418211	0
Bacteria	p__Bacteroidota	c__Bacteroidia	o__Bacteroidales	f__Bacteroidaceae	g__Bacteroides	0	0	0	0.0117144	0	0	0	0.0106355	0	0.014275	0	0	0	0
Bacteria	p__Firmicutes	c__Clostridia	o__Oscillospirales	f__Oscillospiraceae	g__Flavonifractor	0	0	0	0.00911684	0	0	0	0.00425419	0	0	0	0	0	0.0213777
Bacteria	p__Bacteroidota	c__Bacteroidia	o__Chitinophagales	f__Chitinophagaceae	g__Niastella	0.00375349	0	0	0	0	0	0.0101589	0	0	0	0	0	0.0202452	0
Bacteria	p__Firmicutes	c__Clostridia	o__Lachnospirales	f__Lachnospiraceae	g__Mediterraneibacter	0	0	0	0	0	0	0	0.0101037	0	0	0	0.0216049	0	0
Bacteria	p__Proteobacteria	c__Gammaproteobacteria	o__Burkholderiales	f__Burkholderiaceae	g__Cupriavidus	0	0	0	0.00295406	0.0227188	0	0	0	0.00410625	0	0	0	0	0
Bacteria	p__Firmicutes	c__Bacilli	o__Lactobacillales	f__Lactobacillaceae	g__Limosilactobacillus	0	0	0	0	0	0.0292232	0	0	0	0	0	0	0	0
Bacteria	p__Bacteroidota	c__Bacteroidia	o__Chitinophagales	f__Chitinophagaceae	g__Chitinophaga	0.00262744	0	0.00476892	0	0.00335196	0	0.00383447	0	0.00744258	0	0	0	0.00313658	0
Bacteria	p__Firmicutes	c__Bacilli	o__Lactobacillales	f__Aerococcaceae	g__Abiotrophia	0	0	0	0	0	0.0122549	0	0	0	0.0105184	0	0	0	0
Bacteria	p__Patescibacteria	c__Saccharimonadia	o__Saccharimonadales	f__UBA4665	g__Unidentified	0.00281512	0	0.00251452	0	0.00180899	0	0.012101	0	0.00224561	0	0.000875572	0	0	0
Bacteria	p__Chloroflexota	c__Chloroflexia	o__Chloroflexales	f__Roseiflexaceae	g__Kouleothrix	0.00159523	0	0.00390185	0	0	0	0.00542802	0	0	0	0	0	0.0107404	0
Bacteria	p__Firmicutes	c__Clostridia	o__TANB77	f__CAG-508	g__Unidentified	0	0.016003	0	0.00173169	0	0	0	0.00372241	0	0	0	0	0	0
Bacteria	p__Proteobacteria	c__Alphaproteobacteria	o__Caulobacterales	f__Caulobacteraceae	g__Phenylobacterium	0.00297933	0	0	0	0.00686353	0	0	0	0	0	0	0	0.0114058	0
Bacteria	p__Proteobacteria	c__Gammaproteobacteria	o__Burkholderiales	f__Burkholderiaceae	g__KK5	0	0	0	0	0	0	0	0	0	0	0	0	0.0210056	0
Bacteria	p__Firmicutes	c__Clostridia	o__TANB77	f__CAG-508	g__CAG-269	0	0.0141422	0	0.00626464	0	0	0	0	0	0	0	0	0	0
Bacteria	p__Firmicutes	c__Clostridia	o__Oscillospirales	f__Ruminococcaceae	g__Gemmiger	0	0	0	0.0152796	0	0	0	0.0044536	0	0	0	0	0	0
Bacteria	p__Proteobacteria	c__Gammaproteobacteria	o__Burkholderiales	f__Burkholderiaceae	g__Ramlibacter	0.00997021	0	0	0	0.00255387	0	0	0	0	0	0	0	0.00646326	0
Bacteria	p__Proteobacteria	c__Alphaproteobacteria	o__Unidentified	f__Unidentified	g__Unidentified	0.0176179	0	0	0	0	0	0	0	0	0	0	0	0	0
Bacteria	p__Bacteroidota	c__Bacteroidia	o__Bacteroidales	f__Bacteroidaceae	g__UBA4372	0	0	0	0.00432922	0	0	0	0	0	0.013148	0	0	0	0
Bacteria	p__Proteobacteria	c__Alphaproteobacteria	o__Rhodobacterales	f__Rhodobacteraceae	g__Paracoccus	0	0	0.00242782	0	0.00548018	0	0	0	0.00923906	0	0	0	0	0
Bacteria	p__Actinobacteriota	c__Actinomycetia	o__Streptosporangiales	f__Streptosporangiaceae	g__Nonomuraea	0	0	0	0	0	0	0.0164334	0	0	0	0	0	0	0
Bacteria	p__Patescibacteria	c__Saccharimonadia	o__Saccharimonadales	f__UBA4665	g__UBA5150	0	0	0	0	0	0	0	0	0	0	0.0114797	0	0.00484745	0
Bacteria	p__Patescibacteria	c__Saccharimonadia	o__Saccharimonadales	f__UBA1020	g__UBA1020	0.00499683	0	0	0	0.00154296	0	0.00368508	0	0.00320801	0	0	0	0.0021861	0
Bacteria	p__Proteobacteria	c__Alphaproteobacteria	o__Sphingomonadales	f__Sphingomonadaceae	g__Tsuneonella	0	0	0	0.00555159	0.00952381	0	0	0	0	0	0	0	0	0
Bacteria	p__Deinococcota	c__Deinococci	o__Deinococcales	f__Deinococcaceae	g__Deinococcus	0.00194712	0	0.00182086	0	0	0	0	0	0	0	0.00807472	0	0.00275639	0
Bacteria	p__Proteobacteria	c__Gammaproteobacteria	o__Pseudomonadales	f__Moraxellaceae	g__Unidentified	0	0	0	0	0	0.00659879	0	0	0	0	0	0	0	0.00780455
Bacteria	p__Proteobacteria	c__Gammaproteobacteria	o__Enterobacterales	f__Succinivibrionaceae	g__Anaerobiospirillum	0	0	0	0	0	0	0	0	0	0	0	0	0	0.0142518
Bacteria	p__Proteobacteria	c__Alphaproteobacteria	o__Rhizobiales	f__Xanthobacteraceae	g__VAZQ01	0	0	0	0.0141082	0	0	0	0	0	0	0	0	0	0
Bacteria	p__Campylobacterota	c__Campylobacteria	o__Campylobacterales	f__Campylobacteraceae	g__Campylobacter	0	0	0	0.00275033	0	0.0111237	0	0	0	0	0	0	0	0
Bacteria	p__Firmicutes	c__Clostridia	o__Clostridiales	f__Clostridiaceae	g__Clostridium	0	0	0	0.00718142	0	0	0	0.00651422	0	0	0	0	0	0
Bacteria	p__Firmicutes	c__Bacilli	o__Acholeplasmatales	f__Anaeroplasmataceae	g__Pelethenecus	0	0.0133978	0	0	0	0	0	0	0	0	0	0	0	0
Bacteria	p__Actinobacteriota	c__Actinomycetia	o__Actinomycetales	f__Actinomycetaceae	g__Arcanobacterium	0	0	0	0	0	0	0	0	0	0.013148	0	0	0	0
Bacteria	p__Proteobacteria	c__Gammaproteobacteria	o__Burkholderiales	f__Burkholderiaceae	g__Mitsuaria	0	0	0	0	0	0	0	0	0	0	0.0130363	0	0	0
Bacteria	p__Proteobacteria	c__Alphaproteobacteria	o__Sphingomonadales	f__Sphingomonadaceae	g__Sphingopyxis	0	0	0	0	0.00175579	0	0	0	0.0109714	0	0	0	0	0
Bacteria	p__Bacteroidota	c__Bacteroidia	o__Flavobacteriales	f__Weeksellaceae	g__Chryseobacterium	0	0	0.0011272	0.00825099	0.00260708	0	0	0	0	0	0	0	0	0
Bacteria	p__Proteobacteria	c__Gammaproteobacteria	o__Burkholderiales	f__Burkholderiaceae	g__Achromobacter	0	0	0	0.00183355	0	0	0	0	0.00994482	0	0	0	0	0
Bacteria	p__Bacteroidota	c__Bacteroidia	o__Bacteroidales	f__Unidentified	g__Unidentified	0	0	0	0.00275033	0	0	0	0.00438713	0	0	0	0	0	0.00407194
Bacteria	p__Proteobacteria	c__Gammaproteobacteria	o__Xanthomonadales	f__Xanthomonadaceae	g__Pseudoxanthomonas	0	0	0	0	0.0109072	0	0	0	0	0	0	0	0	0
Bacteria	p__Bacteroidota	c__Bacteroidia	o__Flavobacteriales	f__Flavobacteriaceae	g__Unidentified	0	0	0	0	0	0	0	0	0	0	0	0	0	0.0105192
Bacteria	p__Actinobacteriota	c__Actinomycetia	o__Mycobacteriales	f__Mycobacteriaceae	g__Mycobacterium	0	0	0	0.0102883	0	0	0	0	0	0	0	0	0	0
Bacteria	p__Firmicutes	c__Bacilli	o__Lactobacillales	f__Aerococcaceae	g__Aerococcus	0	0	0	0	0	0.010181	0	0	0	0	0	0	0	0
Bacteria	p__Proteobacteria	c__Unidentified	o__Unidentified	f__Unidentified	g__Unidentified	0.00412884	0	0	0.00595905	0	0	0	0	0	0	0	0	0	0
Bacteria	p__Bacteroidota	c__Bacteroidia	o__Flavobacteriales	f__Weeksellaceae	g__Unidentified	0	0	0	0	0	0	0	0	0	0	0.00739372	0	0	0.0023753
Bacteria	p__Firmicutes	c__Clostridia	o__Oscillospirales	f__Oscillospiraceae	g__Lawsonibacter	0	0	0	0	0	0	0	0.00963839	0	0	0	0	0	0
Bacteria	p__Firmicutes	c__Clostridia	o__Peptostreptococcales	f__Peptostreptococcaceae	g__Peptostreptococcus	0	0	0	0	0	0.00942685	0	0	0	0	0	0	0	0
Bacteria	p__Firmicutes	c__Bacilli	o__Exiguobacterales	f__Exiguobacteraceae	g__Exiguobacterium	0	0	0.00329489	0	0.00542698	0	0	0	0.000641601	0	0	0	0	0
Bacteria	p__Bacteroidota	c__Bacteroidia	o__Flavobacteriales	f__Weeksellaceae	g__Bergeyella	0	0.00930406	0	0	0	0	0	0	0	0	0	0	0	0
Bacteria	p__Bacteroidota	c__Bacteroidia	o__Bacteroidales	f__Muribaculaceae	g__Sodaliphilus	0	0	0	0.00280126	0	0	0	0	0	0	0	0	0	0.00644723
Bacteria	p__Proteobacteria	c__Alphaproteobacteria	o__Rhizobiales	f__Beijerinckiaceae	g__Microvirga	0	0	0	0.00336152	0	0	0	0	0	0	0	0	0.00570288	0
Bacteria	p__Bacteroidota	c__Bacteroidia	o__Chitinophagales	f__Chitinophagaceae	g__Unidentified	0.00565369	0	0	0	0	0	0	0	0	0	0.00330771	0	0	0
Bacteria	p__Actinobacteriota	c__Actinomycetia	o__Mycobacteriales	f__Micromonosporaceae	g__Unidentified	0	0	0	0.00886218	0	0	0	0	0	0	0	0	0	0
Bacteria	p__Fusobacteriota	c__Fusobacteriia	o__Fusobacteriales	f__Fusobacteriaceae	g__Fusobacterium	0	0	0	0.00677396	0	0	0	0	0	0	0	0	0	0.00203597
Bacteria	p__Firmicutes	c__Bacilli	o__Staphylococcales	f__Staphylococcaceae	g__Staphylococcus	0	0	0	0.00865845	0	0	0	0	0	0	0	0	0	0
Bacteria	p__Bacteroidota	c__Bacteroidia	o__Flavobacteriales	f__Flavobacteriaceae	g__Flavobacterium	0	0	0	0.00178262	0	0	0	0	0.00686514	0	0	0	0	0
Bacteria	p__Proteobacteria	c__Gammaproteobacteria	o__Unidentified	f__Unidentified	g__Unidentified	0	0.00855973	0	0	0	0	0	0	0	0	0	0	0	0
Bacteria	p__Firmicutes	c__Clostridia	o__Tissierellales	f__Peptoniphilaceae	g__Helcococcus	0	0	0	0	0	0.00848416	0	0	0	0	0	0	0	0
Bacteria	p__Firmicutes	c__Bacilli	o__Lactobacillales	f__Streptococcaceae	g__Lactococcus	0	0	0	0	0	0	0	0	0	0	0	0	0	0.0084832
Bacteria	p__Actinobacteriota	c__Unidentified	o__Unidentified	f__Unidentified	g__Unidentified	0	0	0	0	0	0.0035822	0	0.00478596	0	0	0	0	0	0
Bacteria	p__Bacteroidota	c__Bacteroidia	o__Bacteroidales	f__UBA932	g__Coprenecus	0	0	0	0	0	0	0	0.00830896	0	0	0	0	0	0
Bacteria	p__Bacteroidota	c__Bacteroidia	o__Bacteroidales	f__Tannerellaceae	g__Parabacteroides	0	0	0	0.00646837	0	0	0	0.00166179	0	0	0	0	0	0
Bacteria	p__Actinobacteriota	c__Actinomycetia	o__Unidentified	f__Unidentified	g__Unidentified	0	0	0	0.00774167	0	0	0	0	0	0	0	0	0	0
Bacteria	p__Proteobacteria	c__Alphaproteobacteria	o__Rhizobiales	f__Methyloligellaceae	g__Methyloceanibacter	0	0	0	0.00753794	0	0	0	0	0	0	0	0	0	0
Bacteria	p__Firmicutes	c__Clostridia	o__Oscillospirales	f__Ruminococcaceae	g__Faecalibacterium	0	0	0	0.00743608	0	0	0	0	0	0	0	0	0	0
Bacteria	p__Proteobacteria	c__Gammaproteobacteria	o__Burkholderiales	f__Burkholderiaceae	g__Acidovorax	0.00724893	0	0	0	0	0	0	0	0	0	0	0	0	0
Bacteria	p__Proteobacteria	c__Alphaproteobacteria	o__Rhizobiales	f__Devosiaceae	g__Unidentified	0	0	0	0	0	0	0	0	0	0	0	0	0.00722365	0
Bacteria	p__Firmicutes	c__Negativicutes	o__Selenomonadales	f__Selenomonadaceae	g__Megamonas	0	0	0	0.00224101	0	0	0	0.0049189	0	0	0	0	0	0
Bacteria	p__Bacteroidota	c__Bacteroidia	o__Bacteroidales	f__Rikenellaceae	g__Tidjanibacter	0	0	0	0.00702862	0	0	0	0	0	0	0	0	0	0
Bacteria	p__Bacteroidota	c__Bacteroidia	o__Sphingobacteriales	f__Sphingobacteriaceae	g__Sphingobacterium	0	0	0	0	0.00696994	0	0	0	0	0	0	0	0	0
Bacteria	p__Bacteroidota	c__Bacteroidia	o__Bacteroidales	f__Barnesiellaceae	g__Barnesiella	0	0	0	0.00687583	0	0	0	0	0	0	0	0	0	0
Bacteria	p__Bacteroidota	c__Bacteroidia	o__Bacteroidales	f__Marinifilaceae	g__Odoribacter	0	0	0	0.00188449	0	0	0	0.00498538	0	0	0	0	0	0
Bacteria	p__Actinobacteriota	c__Actinomycetia	o__Actinomycetales	f__Microbacteriaceae	g__Agromyces	0	0	0	0	0.000638468	0	0	0	0	0	0.00593443	0	0	0
Bacteria	p__Proteobacteria	c__Alphaproteobacteria	o__Rhizobiales	f__Hyphomicrobiaceae	g__Unidentified	0	0	0	0.00631558	0	0	0	0	0	0	0	0	0	0
Bacteria	p__Bacteroidota	c__Bacteroidia	o__Chitinophagales	f__Chitinophagaceae	g__Segetibacter	0	0	0.00624295	0	0	0	0	0	0	0	0	0	0	0
Bacteria	p__Actinobacteriota	c__Actinomycetia	o__Propionibacteriales	f__Propionibacteriaceae	g__Cutibacterium	0	0.00446595	0	0.00173169	0	0	0	0	0	0	0	0	0	0
Bacteria	p__Firmicutes	c__Clostridia	o__Oscillospirales	f__Acutalibacteraceae	g__Caproicibacterium	0	0.00483811	0	0	0	0	0	0.00119649	0	0	0	0	0	0
Bacteria	p__Proteobacteria	c__Gammaproteobacteria	o__Burkholderiales	f__Usitatibacteraceae	g__Unidentified	0	0.0059546	0	0	0	0	0	0	0	0	0	0	0	0
Bacteria	p__Bacteroidota	c__Bacteroidia	o__Unidentified	f__Unidentified	g__Unidentified	0	0	0	0.00590812	0	0	0	0	0	0	0	0	0	0
Bacteria	p__Desulfobacterota	c__Desulfovibrionia	o__Desulfovibrionales	f__Desulfovibrionaceae	g__Bilophila	0	0	0	0.00590812	0	0	0	0	0	0	0	0	0	0
Bacteria	p__Bacteroidota	c__Bacteroidia	o__Chitinophagales	f__Chitinophagaceae	g__JJ008	0	0	0	0	0	0.00254525	0	0	0.00327217	0	0	0	0	0
Bacteria	p__Firmicutes	c__Bacilli	o__Erysipelotrichales	f__Coprobacillaceae	g__Catenibacterium	0	0	0	0.00580625	0	0	0	0	0	0	0	0	0	0
Bacteria	p__Firmicutes	c__Bacilli	o__Lactobacillales	f__Aerococcaceae	g__Unidentified	0	0	0	0.00570439	0	0	0	0	0	0	0	0	0	0
Bacteria	p__Acidobacteriota	c__Vicinamibacteria	o__Vicinamibacterales	f__UBA2999	g__WHSN01	0	0	0	0.00565346	0	0	0	0	0	0	0	0	0	0
Bacteria	p__Gemmatimonadota	c__Gemmatimonadetes	o__Gemmatimonadales	f__Gemmatimonadaceae	g__Unidentified	0	0	0	0.00560253	0	0	0	0	0	0	0	0	0	0
Bacteria	p__Bacteroidota	c__Bacteroidia	o__Bacteroidales	f__Bacteroidaceae	g__Unidentified	0	0	0	0.00555159	0	0	0	0	0	0	0	0	0	0
Bacteria	p__Firmicutes	c__Clostridia	o__Oscillospirales	f__Ruminococcaceae	g__Unidentified	0	0	0	0.0053988	0	0	0	0	0	0	0	0	0	0
Bacteria	p__Bacteroidota	c__Bacteroidia	o__Bacteroidales	f__Muribaculaceae	g__Limisoma	0	0	0	0.00529693	0	0	0	0	0	0	0	0	0	0
Bacteria	p__Firmicutes	c__Negativicutes	o__Selenomonadales	f__Selenomonadaceae	g__Unidentified	0	0	0	0	0	0	0	0	0	0.0052592	0	0	0	0
Bacteria	p__Bacteroidota	c__Bacteroidia	o__Bacteroidales	f__Muribaculaceae	g__Amulumruptor	0	0	0	0.00519507	0	0	0	0	0	0	0	0	0	0
Bacteria	p__Firmicutes	c__Bacilli	o__Bacillales	f__Bacillaceae	g__Fredinandcohnia	0	0	0	0.00519507	0	0	0	0	0	0	0	0	0	0
Archaea	p__Thermoproteota	c__Bathyarchaeia	o__B26-1	f__UBA233	g__JADGNF01	0	0	0	0	0	0.0050905	0	0	0	0	0	0	0	0
Bacteria	p__CSP1-3	c__CSP1-3	o__CSP1-3	f__NP-7	g__NP-7	0	0	0	0	0	0.0050905	0	0	0	0	0	0	0	0
Bacteria	p__Bacteroidota	c__Bacteroidia	o__Sphingobacteriales	f__Sphingobacteriaceae	g__SYSU-D00535	0.00185329	0	0	0	0	0	0.000398387	0	0.0012832	0	0	0	0.00152077	0
Bacteria	p__Proteobacteria	c__Gammaproteobacteria	o__Pseudomonadales	f__Cellvibrionaceae	g__Cellvibrio	0	0	0	0	0	0.00499623	0	0	0	0	0	0	0	0
Bacteria	p__Proteobacteria	c__Alphaproteobacteria	o__Rhizobiales	f__Hyphomicrobiaceae	g__Hyphomicrobium	0.000821076	0	0	0	0.00409683	0	0	0	0	0	0	0	0	0
Bacteria	p__Bacteroidota	c__Bacteroidia	o__Cytophagales	f__Unidentified	g__Unidentified	0	0	0	0	0	0	0	0	0.00487617	0	0	0	0	0
Bacteria	p__Bdellovibrionota	c__Bdellovibrionia	o__Bdellovibrionales	f__Bdellovibrionaceae	g__Unidentified	0	0	0	0	0	0	0	0	0	0	0	0	0.00484745	0
Bacteria	p__Patescibacteria	c__Saccharimonadia	o__Saccharimonadales	f__Unidentified	g__Unidentified	0.000703779	0	0	0	0	0.00367647	0.000448185	0	0	0	0	0	0	0
Bacteria	p__Firmicutes	c__Clostridia	o__Peptostreptococcales	f__Peptostreptococcaceae	g__Romboutsia	0	0	0	0.00463482	0	0	0	0	0	0	0	0	0	0
Bacteria	p__Acidobacteriota	c__Acidobacteriae	o__Acidobacteriales	f__Gp1-AA117	g__Gp1-AA17	0	0	0	0.00443109	0	0	0	0	0	0	0	0	0	0
Bacteria	p__Firmicutes	c__Bacilli	o__Erysipelotrichales	f__Erysipelotrichaceae	g__Holdemania	0	0	0	0.00443109	0	0	0	0	0	0	0	0	0	0
Bacteria	p__Proteobacteria	c__Gammaproteobacteria	o__Steroidobacterales	f__Steroidobacteraceae	g__Steroidobacter	0	0	0.000867077	0	0.00117052	0	0	0	0.00237393	0	0	0	0	0
Bacteria	p__Actinobacteriota	c__Actinomycetia	o__Mycobacteriales	f__Pseudonocardiaceae	g__Actinosynnema	0	0	0	0	0	0	0.00438225	0	0	0	0	0	0	0
Bacteria	p__Firmicutes	c__Clostridia	o__Oscillospirales	f__Oscillospiraceae	g__Unidentified	0	0	0	0.00432922	0	0	0	0	0	0	0	0	0	0
Bacteria	p__Nitrospirota	c__Nitrospiria	o__Nitrospirales	f__Nitrospiraceae	g__Nitrospira	0	0	0	0.00432922	0	0	0	0	0	0	0	0	0	0
Bacteria	p__Firmicutes	c__Clostridia	o__TANB77	f__CAG-508	g__CAG-273	0	0	0	0	0	0	0	0.00425419	0	0	0	0	0	0
Bacteria	p__Actinobacteriota	c__Actinomycetia	o__Propionibacteriales	f__Nocardioidaceae	g__Nocardioides	0.000985291	0	0.00164745	0	0	0	0.00159355	0	0	0	0	0	0	0
Bacteria	p__Firmicutes	c__Clostridia	o__Oscillospirales	f__Oscillospiraceae	g__UBA1774	0	0	0	0	0	0	0	0.00418772	0	0	0	0	0	0
Bacteria	p__Firmicutes	c__Clostridia	o__Oscillospirales	f__Oscillospiraceae	g__Dysosmobacter	0	0	0	0.0028522	0	0	0	0.00126296	0	0	0	0	0	0
Bacteria	p__Firmicutes	c__Clostridia	o__Christensenellales	f__CAG-314	g__Fimimonas	0	0	0	0.00407456	0	0	0	0	0	0	0	0	0	0
Archaea	p__Halobacteriota	c__Methanosarcinia	o__Methanotrichales	f__Methanotrichaceae	g__Methanothrix	0	0	0	0.00392177	0	0	0	0	0	0	0	0	0	0
Bacteria	p__Actinobacteriota	c__Actinomycetia	o__Streptosporangiales	f__Streptosporangiaceae	g__Unidentified	0	0	0	0.00392177	0	0	0	0	0	0	0	0	0	0
Bacteria	p__Actinobacteriota	c__Actinomycetia	o__Actinomycetales	f__Microbacteriaceae	g__Leifsonia	0	0	0.00390185	0	0	0	0	0	0	0	0	0	0	0
Bacteria	p__Firmicutes	c__Unidentified	o__Unidentified	f__Unidentified	g__Unidentified	0	0	0	0.0038199	0	0	0	0	0	0	0	0	0	0
Bacteria	p__Chloroflexota	c__Chloroflexia	o__Chloroflexales	f__Unidentified	g__Unidentified	0	0	0	0	0.00159617	0	0	0	0.00218144	0	0	0	0	0
Bacteria	p__Desulfobacterota	c__Binatia	o__UBA9968	f__UBA9968	g__UBA9968	0	0	0	0	0	0.00377074	0	0	0	0	0	0	0	0
Bacteria	p__Actinobacteriota	c__Rubrobacteria	o__Rubrobacterales	f__Rubrobacteraceae	g__Rubrobacter	0	0.00372162	0	0	0	0	0	0	0	0	0	0	0	0
Bacteria	p__Desulfobacterota	c__Binatia	o__UBA9968	f__UBA9968	g__2-12-FULL-60-19	0	0	0	0.00371804	0	0	0	0	0	0	0	0	0	0
Bacteria	p__Chloroflexota	c__Ktedonobacteria	o__Ktedonobacterales	f__Ktedonobacteraceae	g__Ktedonobacter	0	0	0	0.00356524	0	0	0	0	0	0	0	0	0	0
Bacteria	p__Firmicutes	c__Clostridia	o__Oscillospirales	f__Unidentified	g__Unidentified	0	0	0	0.00351431	0	0	0	0	0	0	0	0	0	0
Bacteria	p__Firmicutes	c__Bacilli	o__Lactobacillales	f__Lactobacillaceae	g__Ligilactobacillus	0	0	0	0	0.000798085	0	0	0.00265887	0	0	0	0	0	0
Bacteria	p__Bacteroidota	c__Bacteroidia	o__Bacteroidales	f__Muribaculaceae	g__Unidentified	0	0	0	0.00336152	0	0	0	0	0	0	0	0	0	0
Bacteria	p__Firmicutes	c__Clostridia	o__Lachnospirales	f__Lachnospiraceae	g__Blautia	0	0	0	0.00320872	0	0	0	0	0	0	0	0	0	0
Bacteria	p__Firmicutes	c__Bacilli	o__Erysipelotrichales	f__Erysipelotrichaceae	g__Allobaculum	0	0	0	0.00219008	0	0	0	0	0	0	0	0	0	0.00101798
Bacteria	p__Bdellovibrionota	c__Bdellovibrionia	o__UBA1018	f__UBA1018	g__JABDFB01	0	0	0	0.00305592	0	0	0	0	0	0	0	0	0	0
Bacteria	p__Actinobacteriota	c__Thermoleophilia	o__Unidentified	f__Unidentified	g__Unidentified	0	0	0	0.00305592	0	0	0	0	0	0	0	0	0	0
Bacteria	p__Fusobacteriota	c__Fusobacteriia	o__Fusobacteriales	f__Leptotrichiaceae	g__Leptotrichia	0	0.0029773	0	0	0	0	0	0	0	0	0	0	0	0
Bacteria	p__CSP1-3	c__CSP1-3	o__CSP1-3	f__CSP1-3	g__VGFA01	0	0	0	0	0	0.00292232	0	0	0	0	0	0	0	0
Bacteria	p__Planctomycetota	c__Planctomycetia	o__Gemmatales	f__Gemmataceae	g__REEB421	0	0	0	0.00280126	0	0	0	0	0	0	0	0	0	0
Bacteria	p__Firmicutes	c__Bacilli	o__Paenibacillales	f__Paenibacillaceae	g__Paenibacillus	0	0	0	0.00280126	0	0	0	0	0	0	0	0	0	0
Bacteria	p__Firmicutes	c__Clostridia	o__Peptostreptococcales	f__Peptostreptococcaceae	g__Terrisporobacter	0	0	0	0.00275033	0	0	0	0	0	0	0	0	0	0
Bacteria	p__Firmicutes	c__Bacilli	o__Bacillales	f__Bacillaceae	g__Bacillus	0	0	0	0.0026994	0	0	0	0	0	0	0	0	0	0
Bacteria	p__Myxococcota	c__Polyangia	o__Palsa-1104	f__Fen-1088	g__Fen-1137	0	0	0	0.0025466	0	0	0	0	0	0	0	0	0	0
Bacteria	p__Bacteroidota	c__Bacteroidia	o__Chitinophagales	f__Chitinophagaceae	g__Flavipsychrobacter	0	0	0	0.0025466	0	0	0	0	0	0	0	0	0	0
Bacteria	p__Firmicutes	c__Clostridia	o__Christensenellales	f__CAG-74	g__UBA11524	0	0	0	0.0025466	0	0	0	0	0	0	0	0	0	0
Bacteria	p__Firmicutes	c__Clostridia	o__Peptostreptococcales	f__Anaerovoracaceae	g__Unidentified	0	0	0	0.0025466	0	0	0	0	0	0	0	0	0	0
Bacteria	p__Proteobacteria	c__Alphaproteobacteria	o__Azospirillales	f__Azospirillaceae	g__Azospirillum	0	0	0	0	0	0	0	0	0.00250225	0	0	0	0	0
Bacteria	p__Firmicutes	c__Bacilli	o__RF39	f__UBA660	g__Unidentified	0	0	0	0.00249567	0	0	0	0	0	0	0	0	0	0
Bacteria	p__Synergistota	c__Synergistia	o__Synergistales	f__Aminobacteriaceae	g__Aminivibrio	0	0	0	0.00244474	0	0	0	0	0	0	0	0	0	0
Bacteria	p__Proteobacteria	c__Gammaproteobacteria	o__Burkholderiales	f__Burkholderiaceae	g__Paenalcaligenes	0	0	0	0.00244474	0	0	0	0	0	0	0	0	0	0
Bacteria	p__Desulfobacterota	c__Binatia	o__UBA9968	f__UBA9968	g__Unidentified	0	0	0	0.00244474	0	0	0	0	0	0	0	0	0	0
Bacteria	p__CSP1-3	c__CSP1-3	o__CSP1-3	f__13-1-40CM-64-14	g__NP-4	0	0	0	0	0	0.00235671	0	0	0	0	0	0	0	0
Bacteria	p__Acidobacteriota	c__Acidobacteriae	o__Unidentified	f__Unidentified	g__Unidentified	0	0	0	0.00234287	0	0	0	0	0	0	0	0	0	0
Bacteria	p__Gemmatimonadota	c__Gemmatimonadetes	o__Gemmatimonadales	f__Gemmatimonadaceae	g__SCN-70-22	0	0	0	0.00229194	0	0	0	0	0	0	0	0	0	0
Bacteria	p__Chloroflexota	c__Unidentified	o__Unidentified	f__Unidentified	g__Unidentified	0	0	0	0	0	0.00216817	0	0	0	0	0	0	0	0
Bacteria	p__Bacteroidota	c__Bacteroidia	o__Chitinophagales	f__Chitinophagaceae	g__Flavisolibacter	0	0	0	0	0	0	0.00214133	0	0	0	0	0	0	0
Bacteria	p__Proteobacteria	c__Alphaproteobacteria	o__RF32	f__CAG-239	g__Scatocola	0	0	0	0.00213915	0	0	0	0	0	0	0	0	0	0
Bacteria	p__Acidobacteriota	c__Vicinamibacteria	o__Vicinamibacterales	f__Vicinamibacteraceae	g__Luteitalea	0	0	0	0	0.000798085	0	0	0	0.0012832	0	0	0	0	0
Bacteria	p__Bacteroidota	c__Bacteroidia	o__Bacteroidales	f__Marinifilaceae	g__Butyricimonas	0	0	0	0.00203728	0	0	0	0	0	0	0	0	0	0
Bacteria	p__Planctomycetota	c__SZUA-567	o__SZUA-567	f__SZUA-567	g__SZUA-421	0	0	0	0.00203728	0	0	0	0	0	0	0	0	0	0
Bacteria	p__Firmicutes	c__Clostridia	o__Oscillospirales	f__Acutalibacteraceae	g__Fimenecus	0	0	0	0.00198635	0	0	0	0	0	0	0	0	0	0
Bacteria	p__Proteobacteria	c__Gammaproteobacteria	o__Burkholderiales	f__Unidentified	g__Unidentified	0	0	0	0.00188449	0	0	0	0	0	0	0	0	0	0
Bacteria	p__Acidobacteriota	c__Vicinamibacteria	o__Vicinamibacterales	f__UBA2999	g__Gp6-AA40	0	0	0	0.00183355	0	0	0	0	0	0	0	0	0	0
Bacteria	p__Planctomycetota	c__Phycisphaerae	o__Phycisphaerales	f__Unidentified	g__Unidentified	0	0	0	0	0	0	0	0	0.00173232	0	0	0	0	0
Bacteria	p__Firmicutes	c__Clostridia	o__Oscillospirales	f__Oscillospiraceae	g__Faecousia	0	0	0	0.00173169	0	0	0	0	0	0	0	0	0	0
Bacteria	p__Acidobacteriota	c__Acidobacteriae	o__Bryobacterales	f__Bryobacteraceae	g__VFZY01	0	0	0	0.00173169	0	0	0	0	0	0	0	0	0	0
Bacteria	p__Planctomycetota	c__Planctomycetia	o__Gemmatales	f__Gemmataceae	g__Gemmata	0	0	0	0.00173169	0	0	0	0	0	0	0	0	0	0
Bacteria	p__Acidobacteriota	c__Blastocatellia	o__Pyrinomonadales	f__Pyrinomonadaceae	g__Unidentified	0	0	0	0	0.00170258	0	0	0	0	0	0	0	0	0
Bacteria	p__Actinobacteriota	c__Actinomycetia	o__Propionibacteriales	f__Nocardioidaceae	g__Aeromicrobium	0	0	0	0.00168076	0	0	0	0	0	0	0	0	0	0
Bacteria	p__Firmicutes	c__Clostridia	o__Lachnospirales	f__Lachnospiraceae	g__Merdisoma	0	0	0	0	0	0	0	0.00166179	0	0	0	0	0	0
Bacteria	p__Actinobacteriota	c__Actinomycetia	o__Mycobacteriales	f__Mycobacteriaceae	g__Corynebacterium	0	0	0	0.00162983	0	0	0	0	0	0	0	0	0	0
Bacteria	p__Proteobacteria	c__Alphaproteobacteria	o__Reyranellales	f__Reyranellaceae	g__SYSU-D60007	0	0	0	0.000967709	0.000638468	0	0	0	0	0	0	0	0	0
Bacteria	p__Actinobacteriota	c__Actinomycetia	o__Mycobacteriales	f__Micromonosporaceae	g__Glycomyces	0	0	0	0	0	0	0	0	0.001604	0	0	0	0	0
Bacteria	p__Actinobacteriota	c__Actinomycetia	o__Actinomycetales	f__Actinomycetaceae	g__Actinomyces	0	0	0	0	0	0.00160256	0	0	0	0	0	0	0	0
Bacteria	p__Actinobacteriota	c__Acidimicrobiia	o__IMCC26256	f__PALSA-555	g__SHVJ01	0	0	0	0.00157889	0	0	0	0	0	0	0	0	0	0
Bacteria	p__Actinobacteriota	c__Thermoleophilia	o__Solirubrobacterales	f__Solirubrobacteraceae	g__Solirubrobacter	0	0	0	0.00157889	0	0	0	0	0	0	0	0	0	0
Bacteria	p__Proteobacteria	c__Gammaproteobacteria	o__Burkholderiales	f__Rhodocyclaceae	g__Unidentified	0	0	0	0.00157889	0	0	0	0	0	0	0	0	0	0
Bacteria	p__Bdellovibrionota	c__Bdellovibrionia	o__Bdellovibrionales	f__Bdellovibrionaceae	g__Bdellovibrio	0.000797617	0	0	0	0	0	0	0	0	0	0.000778286	0	0	0
Bacteria	p__Firmicutes	c__Clostridia	o__Oscillospirales	f__Butyricicoccaceae	g__Butyricicoccus	0	0	0	0	0	0	0	0.00152885	0	0	0	0	0	0
Bacteria	p__Actinobacteriota	c__Actinomycetia	o__Actinomycetales	f__Actinomycetaceae	g__Mobiluncus	0	0	0	0.00152796	0	0	0	0	0	0	0	0	0	0
Bacteria	p__Proteobacteria	c__Gammaproteobacteria	o__Steroidobacterales	f__Steroidobacteraceae	g__13-2-20CM-66-19	0.00035189	0	0	0	0	0	0	0	0	0	0	0	0.00114058	0
Bacteria	p__Firmicutes	c__Bacilli	o__RF39	f__UBA660	g__Onthocola	0	0.00148865	0	0	0	0	0	0	0	0	0	0	0	0
Bacteria	p__Chloroflexota	c__Limnocylindria	o__Limnocylindrales	f__CSP1-4	g__UBA5189	0	0	0	0.00147703	0	0	0	0	0	0	0	0	0	0
Bacteria	p__Proteobacteria	c__Gammaproteobacteria	o__Burkholderiales	f__Casimicrobiaceae	g__VBCG01	0	0	0	0.00147703	0	0	0	0	0	0	0	0	0	0
Bacteria	p__Firmicutes	c__Clostridia	o__Unidentified	f__Unidentified	g__Unidentified	0	0	0	0.0014261	0	0	0	0	0	0	0	0	0	0
Bacteria	p__Firmicutes	c__Clostridia	o__Oscillospirales	f__Ruminococcaceae	g__Avimicrobium	0	0	0	0	0	0	0	0.00139591	0	0	0	0	0	0
Bacteria	p__Firmicutes	c__Clostridia	o__Christensenellales	f__CAG-917	g__CAG-475	0	0	0	0	0	0	0	0.00139591	0	0	0	0	0	0
Bacteria	p__Proteobacteria	c__Alphaproteobacteria	o__Azospirillales	f__Azospirillaceae	g__Skermanella	0.00136064	0	0	0	0	0	0	0	0	0	0	0	0	0
Bacteria	p__Proteobacteria	c__Alphaproteobacteria	o__Azospirillales	f__Azospirillaceae	g__Aerophototrophica	0	0	0	0	0	0	0	0	0.00134736	0	0	0	0	0
Bacteria	p__Bacteroidota	c__Bacteroidia	o__Cytophagales	f__Cyclobacteriaceae	g__Chryseolinea	0	0	0	0	0.00133014	0	0	0	0	0	0	0	0	0
Bacteria	p__Myxococcota	c__Polyangia	o__Haliangiales	f__Haliangiaceae	g__JABFXX01	0	0	0	0	0.00133014	0	0	0	0	0	0	0	0	0
Bacteria	p__Bacteroidota	c__Bacteroidia	o__Bacteroidales	f__Bacteroidaceae	g__UBA6398	0	0	0	0	0	0	0	0.00132943	0	0	0	0	0	0
Bacteria	p__Actinobacteriota	c__UBA4738	o__UBA4738	f__HRBIN12	g__DSJA01	0	0	0	0.00132423	0	0	0	0	0	0	0	0	0	0
Bacteria	p__Proteobacteria	c__Gammaproteobacteria	o__Xanthomonadales	f__Rhodanobacteraceae	g__Frateuria	0	0	0	0	0	0	0.00129476	0	0	0	0	0	0	0
Bacteria	p__Verrucomicrobiota	c__Verrucomicrobiae	o__Opitutales	f__Opitutaceae	g__Unidentified	0	0	0.000606954	0	0	0	0.000647378	0	0	0	0	0	0	0
Bacteria	p__Actinobacteriota	c__Actinomycetia	o__Streptomycetales	f__Streptomycetaceae	g__Unidentified	0	0	0	0.00117144	0	0	0	0	0	0	0	0	0	0
Bacteria	p__Bacteroidota	c__Bacteroidia	o__Chitinophagales	f__Chitinophagaceae	g__Sediminibacterium	0.00114951	0	0	0	0	0	0	0	0	0	0	0	0	0
Bacteria	p__Firmicutes	c__Clostridia	o__Lachnospirales	f__Lachnospiraceae	g__Lachnoanaerobaculum	0	0	0	0	0	0.00113122	0	0	0	0	0	0	0	0
Bacteria	p__Firmicutes	c__Bacilli	o__ML615J-28	f__CAG-698	g__Unidentified	0	0	0	0.00106957	0	0	0	0	0	0	0	0	0	0
Bacteria	p__Firmicutes	c__Negativicutes	o__Veillonellales	f__Megasphaeraceae	g__Megasphaera	0	0	0	0	0	0	0	0.00106355	0	0	0	0	0	0
Bacteria	p__Verrucomicrobiota	c__Verrucomicrobiae	o__Verrucomicrobiales	f__Akkermansiaceae	g__Unidentified	0	0	0	0	0	0	0	0	0.00102656	0	0	0	0	0
Bacteria	p__Firmicutes	c__Clostridia	o__Oscillospirales	f__Ruminococcaceae	g__UBA866	0	0	0	0.00101864	0	0	0	0	0	0	0	0	0	0
Bacteria	p__Proteobacteria	c__Alphaproteobacteria	o__Sphingomonadales	f__Sphingomonadaceae	g__Sandaracinobacter	0	0	0	0	0	0	0	0	0.000962402	0	0	0	0	0
Bacteria	p__Actinobacteriota	c__Actinomycetia	o__Actinomycetales	f__Bifidobacteriaceae	g__Unidentified	0	0	0	0.000916777	0	0	0	0	0	0	0	0	0	0
Bacteria	p__Bacteroidota	c__Bacteroidia	o__Chitinophagales	f__Chitinophagaceae	g__Lacibacter	0	0	0	0	0.000904496	0	0	0	0	0	0	0	0	0
Bacteria	p__Proteobacteria	c__Alphaproteobacteria	o__Rhizobiales	f__Xanthobacteraceae	g__Unidentified	0	0	0	0.000865845	0	0	0	0	0	0	0	0	0	0
Bacteria	p__Bdellovibrionota	c__Bdellovibrionia	o__Bdellovibrionales	f__Bdellovibrionaceae	g__UBA2316	0.000844535	0	0	0	0	0	0	0	0	0	0	0	0	0
Bacteria	p__Myxococcota	c__Polyangia	o__Polyangiales	f__Polyangiaceae	g__Unidentified	0	0	0	0.000356524	0	0	0	0	0	0	0.000486429	0	0	0
Bacteria	p__Proteobacteria	c__Gammaproteobacteria	o__Legionellales	f__Legionellaceae	g__Unidentified	0	0	0	0	0	0	0	0	0.000834082	0	0	0	0	0
Bacteria	p__Bacteroidota	c__Bacteroidia	o__Bacteroidales	f__Rikenellaceae	g__Mucinivorans	0	0	0	0.000814913	0	0	0	0	0	0	0	0	0	0
Bacteria	p__Chloroflexota	c__Anaerolineae	o__Aggregatilineales	f__A4b	g__OLB13	0	0	0	0	0.000798085	0	0	0	0	0	0	0	0	0
Bacteria	p__Patescibacteria	c__Saccharimonadia	o__Saccharimonadales	f__Saccharimonadaceae	g__Saccharimonas	0.000797617	0	0	0	0	0	0	0	0	0	0	0	0	0
Bacteria	p__Bacteroidota	c__Bacteroidia	o__Chitinophagales	f__LD1	g__UBA1941	0	0	0	0	0	0	0	0	0.000769922	0	0	0	0	0
Bacteria	p__Bdellovibrionota	c__Bdellovibrionia	o__Bdellovibrionales	f__Bdellovibrionaceae	g__Pseudobdellovibrio	0.000750698	0	0	0	0	0	0	0	0	0	0	0	0	0
Bacteria	p__Proteobacteria	c__Alphaproteobacteria	o__Rhizobiales	f__Beijerinckiaceae	g__Unidentified	0.000750698	0	0	0	0	0	0	0	0	0	0	0	0	0
Bacteria	p__Actinobacteriota	c__Coriobacteriia	o__Coriobacteriales	f__Eggerthellaceae	g__CAG-1427	0	0	0	0.000662117	0	0	0	0	0	0	0	0	0	0
Bacteria	p__Bacteroidota	c__Bacteroidia	o__Bacteroidales	f__Dysgonomonadaceae	g__Dysgonomonas	0	0	0	0	0	0	0	0.000598245	0	0	0	0	0	0
Bacteria	p__Verrucomicrobiota	c__Verrucomicrobiae	o__Opitutales	f__Opitutaceae	g__Opi-474	0	0	0	0	0	0	0	0	0.000577441	0	0	0	0	0
Bacteria	p__Actinobacteriota	c__Acidimicrobiia	o__Acidimicrobiales	f__Unidentified	g__Unidentified	0	0	0.000520246	0	0	0	0	0	0	0	0	0	0	0
Bacteria	p__Actinobacteriota	c__Actinomycetia	o__Mycobacteriales	f__Micromonosporaceae	g__Catelliglobosispora	0	0	0	0	0	0	0	0	0.000513281	0	0	0	0	0
Bacteria	p__Firmicutes	c__Bacilli	o__Bacillales	f__Bacillaceae	g__Priestia	0.000469186	0	0	0	0	0	0	0	0	0	0	0	0	0
Bacteria	p__Gemmatimonadota	c__Gemmatimonadetes	o__Gemmatimonadales	f__Gemmatimonadaceae	g__AG11	0.00032843	0	0	0	0	0	0	0	0	0	0	0	0	0
Bacteria	p__Firmicutes	c__Clostridia	o__Christensenellales	f__Borkfalkiaceae	g__UBA1259	0	0	0	0	0	0	0	0.000265887	0	0	0	0	0	0
Bacteria	p__Firmicutes	c__Bacilli	o__Erysipelotrichales	f__Erysipelotrichaceae	g__Unidentified	0	0	0	0	0	0	0	0.000265887	0	0	0	0	0	0
Bacteria	p__Actinobacteriota	c__Geothermincolia	o__Geothermincolales	f__RBG-13-55-18	g__Unidentified	0.000140756	0	0	0	0	0	0	0	0	0	0	0	0	0
Bacteria	p__Firmicutes	c__Bacilli	o__Lactobacillales	f__Enterococcaceae	g__Unidentified	0	0	0	0	0	0	0	0.000132943	0	0	0	0	0	0

## Sheet: %Species
Kingdom	Phylum	Class	Order	Family	Genus	Species	T1-R	T1-S	T2-R	T2-S	T3-R	T3-S	T4-R	T4-S	T5-R	T5-S	T6-R	T6-S	T7-R	T7-S
Bacteria	p__Proteobacteria	c__Alphaproteobacteria	o__Sphingomonadales	f__Sphingomonadaceae	g__Novosphingobium	s__Novosphingobium sp019075875	0.0604312	0	0.0354635	0.0105939	0.0253259	0	0.129276	0	0.119787	0	0.157408	0.0709877	0.235434	0
Bacteria	p__Proteobacteria	c__Gammaproteobacteria	o__Enterobacterales	f__Enterobacteriaceae	g__Klebsiella	s__Klebsiella pneumoniae	0	0.136956	0	0.0296425	0	0.102847	0	0.00744483	0.0138586	0.149887	0	0.237654	0	0.124873
Bacteria	p__Proteobacteria	c__Gammaproteobacteria	o__Enterobacterales	f__Enterobacteriaceae	g__Escherichia	s__Unidentified	0	0.0640119	0	0.0399307	0	0.0705128	0	0.388859	0.00712178	0.0266717	0.00466971	0	0.0095048	0.0400407
Bacteria	p__Proteobacteria	c__Alphaproteobacteria	o__Sphingomonadales	f__Sphingomonadaceae	g__Novosphingobium	s__Novosphingobium capsulatum	0	0.0989952	0	0.0375369	0	0.0350679	0	0.266684	0	0.0818933	0	0	0.00589298	0.0536138
Bacteria	p__Proteobacteria	c__Gammaproteobacteria	o__Burkholderiales	f__Burkholderiaceae	g__Unidentified	s__Unidentified	0.102376	0	0.0843666	0.0115616	0.0294759	0	0.0575669	0	0.0300269	0	0.0323961	0	0.164528	0.0149304
Bacteria	p__Proteobacteria	c__Gammaproteobacteria	o__Enterobacterales	f__Pasteurellaceae	g__Haemophilus	s__Unidentified	0	0.109788	0	0.01421	0	0.0874811	0	0	0.00532529	0.109316	0	0.114198	0	0.0743129
Bacteria	p__Firmicutes	c__Bacilli	o__Lactobacillales	f__Streptococcaceae	g__Streptococcus	s__Unidentified	0.000516105	0.0904354	0	0.0222064	0	0.099359	0	0.0122973	0.00449121	0.0909091	0.00165386	0.12037	0	0.0658297
Bacteria	p__Actinobacteriota	c__Actinomycetia	o__Streptomycetales	f__Streptomycetaceae	g__Streptomyces	s__Unidentified	0.0346025	0	0.133703	0.00315779	0.0434158	0	0.12599	0	0.0143719	0	0.0502967	0	0.0530368	0
Bacteria	p__Proteobacteria	c__Gammaproteobacteria	o__Burkholderiales	f__Neisseriaceae	g__Neisseria	s__Unidentified	0	0.0699665	0	0.0198126	0	0.0532617	0.000796773	0.00717894	0.0100731	0.0879038	0.00282129	0.117284	0	0.0732949
Bacteria	p__Proteobacteria	c__Alphaproteobacteria	o__Rhizobiales	f__Rhizobiaceae	g__Agrobacterium	s__Unidentified	0.0255472	0	0.0382381	0	0.0631551	0	0.0218117	0	0.172976	0	0.0434867	0	0.0707157	0
Bacteria	p__Proteobacteria	c__Alphaproteobacteria	o__Rhizobiales	f__Xanthobacteraceae	g__Bradyrhizobium	s__Unidentified	0.0492646	0	0.0512443	0.00590812	0.0160149	0	0.0465116	0.00339006	0.127807	0	0.0706294	0	0.0382093	0.0176451
Bacteria	p__Proteobacteria	c__Gammaproteobacteria	o__Burkholderiales	f__Burkholderiaceae	g__Massilia	s__Unidentified	0.0336407	0	0.212347	0	0.0114924	0	0.0513919	0	0	0	0.0566203	0	0	0
Bacteria	p__Proteobacteria	c__Gammaproteobacteria	o__Enterobacterales	f__Enterobacteriaceae	g__Cronobacter	s__Cronobacter malonaticus	0.119619	0	0.0383248	0	0.0389465	0	0.0406354	0	0.011613	0	0.009534	0	0.00380192	0.0223957
Bacteria	p__Proteobacteria	c__Alphaproteobacteria	o__Rhizobiales	f__Rhizobiaceae	g__Unidentified	s__Unidentified	0.028245	0	0.0384982	0.0110523	0.0654961	0	0.0254469	0	0.0336199	0	0.017706	0	0.0255679	0.021717
Bacteria	p__Firmicutes	c__Clostridia	o__Peptostreptococcales	f__Peptostreptococcaceae	g__Unidentified	s__Unidentified	0	0.06885	0	0.0249567	0	0.0668363	0	0.0276522	0.00295137	0.0195342	0	0	0	0.0542925
Bacteria	p__Proteobacteria	c__Gammaproteobacteria	o__Enterobacterales	f__Enterobacteriaceae	g__Enterobacter	s__Unidentified	0.111572	0	0	0	0.134238	0	0	0	0.00962402	0	0	0	0	0
Bacteria	p__Proteobacteria	c__Alphaproteobacteria	o__Sphingomonadales	f__Sphingomonadaceae	g__Unidentified	s__Unidentified	0.00835151	0	0.0524582	0	0.0291567	0	0.0403366	0	0.0447196	0	0.0546746	0	0.0049425	0
Bacteria	p__Firmicutes	c__Negativicutes	o__Veillonellales	f__Veillonellaceae	g__Veillonella	s__Veillonella parvula	0.000211134	0.0442873	0	0.00926963	0	0.0216817	0	0	0.00320801	0	0.000972857	0.0802469	0	0.0261283
Bacteria	p__Firmicutes	c__Bacilli	o__Haloplasmatales	f__Turicibacteraceae	g__Turicibacter	s__Turicibacter sp001543345	0	0	0	0.0188449	0	0.0135747	0	0.00850838	0	0.0345605	0.000778286	0.0679012	0	0.0400407
Bacteria	p__Proteobacteria	c__Alphaproteobacteria	o__Rhizobiales	f__Rhizobiaceae	g__Rhizobium	s__Unidentified	0.0155301	0	0.00728345	0	0	0	0.0640406	0	0	0	0.0495184	0	0.0405855	0
Bacteria	p__Proteobacteria	c__Alphaproteobacteria	o__Sphingomonadales	f__Sphingomonadaceae	g__Sphingomonas	s__Unidentified	0	0	0.00641637	0	0.0124501	0	0.0145411	0	0	0	0	0	0.029655	0.111978
Bacteria	p__Proteobacteria	c__Gammaproteobacteria	o__Burkholderiales	f__Burkholderiaceae	g__Schlegelella	s__Schlegelella thermodepolymerans	0.00574753	0	0.0329489	0.00290313	0.0178239	0	0.0258951	0	0.0094957	0	0	0.0308642	0.043627	0
Bacteria	p__Proteobacteria	c__Gammaproteobacteria	o__Enterobacterales	f__Vibrionaceae	g__Vibrio	s__Vibrio sinensis	0.132991	0	0	0	0.0343708	0	0	0	0	0	0	0	0	0
Bacteria	p__Proteobacteria	c__Alphaproteobacteria	o__Sphingomonadales	f__Sphingomonadaceae	g__Novosphingobium	s__Unidentified	0.0177118	0	0	0.00876031	0.0156957	0	0	0	0.0902733	0	0.0116743	0	0.0140671	0
Bacteria	p__Actinobacteriota	c__Actinomycetia	o__Actinomycetales	f__Micrococcaceae	g__Unidentified	s__Unidentified	0.0157177	0	0.0229775	0.00580625	0.0586326	0	0.0159355	0	0.0347748	0	0	0	0	0
Bacteria	p__Bacteroidota	c__Bacteroidia	o__Bacteroidales	f__Bacteroidaceae	g__Alloprevotella	s__Alloprevotella sp900095835	0	0.0584295	0	0.0039727	0	0.0277149	0	0	0.00288721	0.0368144	0	0	0	0.022735
Bacteria	p__Proteobacteria	c__Gammaproteobacteria	o__Burkholderiales	f__Burkholderiaceae	g__Comamonas	s__Comamonas acidovorans	0	0	0	0.0844453	0	0.016497	0	0.0372241	0	0.0101427	0	0	0	0
Bacteria	p__Proteobacteria	c__Gammaproteobacteria	o__Enterobacterales	f__Enterobacteriaceae	g__Unidentified	s__Unidentified	0	0	0.0136131	0	0.111413	0	0	0	0	0	0	0	0	0
Bacteria	p__Proteobacteria	c__Gammaproteobacteria	o__Burkholderiales	f__Neisseriaceae	g__Neisseria	s__Neisseria elongata	0	0.0424265	0	0.00774167	0	0.0246983	0	0	0	0.0191585	0	0	0	0.020699
Bacteria	p__Proteobacteria	c__Gammaproteobacteria	o__Burkholderiales	f__Burkholderiaceae	g__Pelomonas	s__Pelomonas sp003550215	0.0306848	0	0	0.00733422	0	0	0.0396395	0	0	0	0.0368713	0	0	0
Bacteria	p__Proteobacteria	c__Gammaproteobacteria	o__Burkholderiales	f__Burkholderiaceae	g__Noviherbaspirillum	s__Noviherbaspirillum_A sp019052805	0	0	0.0397988	0.00275033	0.0283054	0	0.0387929	0	0	0	0	0	0	0
Bacteria	p__Actinobacteriota	c__Actinomycetia	o__Mycobacteriales	f__Pseudonocardiaceae	g__Lentzea	s__Unidentified	0.0073193	0	0.0117922	0	0.00936419	0	0.0243016	0	0	0	0.0345364	0	0.015873	0
Bacteria	p__Proteobacteria	c__Alphaproteobacteria	o__Rhizobiales	f__Beijerinckiaceae	g__Bosea	s__Unidentified	0.00703779	0	0.00693662	0	0.0269753	0	0	0	0	0	0.0489347	0	0.0103602	0
Bacteria	p__Proteobacteria	c__Alphaproteobacteria	o__Caulobacterales	f__Caulobacteraceae	g__Asticcacaulis	s__Unidentified	0.0215356	0	0.022544	0	0.0122905	0	0.0220607	0	0	0	0.00865843	0	0.00788898	0
Bacteria	p__Actinobacteriota	c__Actinomycetia	o__Actinomycetales	f__Micrococcaceae	g__Rothia	s__Rothia sp001808955	0	0.0279122	0	0	0	0.0171569	0	0	0	0.0338092	0	0	0	0.0145911
Bacteria	p__Proteobacteria	c__Alphaproteobacteria	o__Rhizobiales	f__Rhizobiaceae	g__Ochrobactrum	s__Ochrobactrum_A pseudogrignonensis	0	0	0	0.068198	0	0.00254525	0	0.0155544	0	0	0	0	0	0
Bacteria	p__Proteobacteria	c__Gammaproteobacteria	o__Burkholderiales	f__Neisseriaceae	g__Neisseria	s__Neisseria bacilliformis	0	0.0294008	0	0.00193542	0	0.0208333	0	0	0	0.015402	0	0	0	0.0142518
Bacteria	p__Actinobacteriota	c__Actinomycetia	o__Mycobacteriales	f__Pseudonocardiaceae	g__Amycolatopsis	s__Unidentified	0.0020175	0	0.0297407	0	0.00526736	0	0.0185748	0	0	0	0.018387	0	0.00598802	0
Bacteria	p__Proteobacteria	c__Alphaproteobacteria	o__Sphingomonadales	f__Sphingomonadaceae	g__Sphingomicrobium	s__Unidentified	0.0147559	0	0	0	0	0	0	0	0	0	0	0	0.063302	0
Bacteria	p__Nitrospinota	c__UBA7883	o__UBA7883	f__JADGCD01	g__JADGCD01	s__JADGCD01 sp015229165	0.00326084	0	0	0.00259753	0	0.0106523	0	0	0	0.054846	0	0	0	0
Bacteria	p__Desulfobacterota	c__Desulfovibrionia	o__Desulfovibrionales	f__Desulfovibrionaceae	g__Unidentified	s__Unidentified	0	0	0	0	0	0	0	0.00332358	0	0	0	0.058642	0	0
Bacteria	p__Proteobacteria	c__Gammaproteobacteria	o__Enterobacterales	f__Enterobacteriaceae	g__Pantoea	s__Unidentified	0	0	0	0.00825099	0	0	0.0499975	0	0	0	0	0	0	0
Bacteria	p__Proteobacteria	c__Gammaproteobacteria	o__Burkholderiales	f__Burkholderiaceae	g__Pseudoduganella	s__Pseudoduganella armeniaca	0	0	0	0	0	0	0	0	0	0.0105184	0.0461134	0	0	0
Bacteria	p__Firmicutes	c__Bacilli	o__Lactobacillales	f__Aerococcaceae	g__Granulicatella	s__Unidentified	0	0.0327503	0	0	0	0	0	0	0	0	0	0	0	0.023753
Bacteria	p__Proteobacteria	c__Alphaproteobacteria	o__Rhizobiales	f__Rhizobiaceae	g__Ensifer	s__Unidentified	0	0	0	0	0	0	0.0088641	0	0	0	0.0474754	0	0	0
Bacteria	p__Proteobacteria	c__Gammaproteobacteria	o__Burkholderiales	f__Methylophilaceae	g__Unidentified	s__Unidentified	0.0192836	0	0	0	0.00154296	0.000282805	0.0126488	0	0.00230977	0	0	0	0.0121661	0.00610791
Bacteria	p__Firmicutes	c__Bacilli	o__Lactobacillales	f__Lactobacillaceae	g__Lactobacillus	s__Unidentified	0.000164215	0.00744325	0	0.00606091	0	0	0	0.0244616	0	0.0157776	0	0	0	0
Bacteria	p__Firmicutes	c__Bacilli	o__Staphylococcales	f__Gemellaceae	g__Gemella	s__Unidentified	0	0	0	0.00468575	0	0.0142345	0	0	0	0.025169	0	0	0	0.0084832
Bacteria	p__Proteobacteria	c__Gammaproteobacteria	o__Pseudomonadales	f__Pseudomonadaceae	g__Pseudomonas	s__Unidentified	0	0	0	0.00366711	0.00462889	0.00791855	0	0	0.0253433	0	0	0	0	0.00746522
Bacteria	p__Bacteroidota	c__Bacteroidia	o__Bacteroidales	f__Rikenellaceae	g__Alistipes	s__Alistipes onderdonkii	0	0	0	0.00249567	0	0	0	0	0	0	0	0.0462963	0	0
Bacteria	p__Proteobacteria	c__Alphaproteobacteria	o__Rhizobiales	f__Beijerinckiaceae	g__Methylobacterium	s__Unidentified	0.0028855	0	0.0326888	0	0	0	0.00333649	0.00113002	0	0	0.00807472	0	0	0
Bacteria	p__Actinobacteriota	c__Actinomycetia	o__Actinomycetales	f__Micrococcaceae	g__Paenarthrobacter	s__Unidentified	0	0	0	0	0.0187816	0	0	0	0	0	0.029283	0	0	0
Bacteria	p__Firmicutes	c__Bacilli	o__Lactobacillales	f__Enterococcaceae	g__Enterococcus	s__Enterococcus faecalis	0	0	0	0	0	0.0307315	0	0.016485	0	0	0	0	0	0
Bacteria	p__Firmicutes	c__Clostridia	o__Lachnospirales	f__Lachnospiraceae	g__Unidentified	s__Unidentified	0	0	0	0.00448202	0	0.0234729	0	0.00132943	0	0	0	0	0	0.0176451
Bacteria	p__Proteobacteria	c__Alphaproteobacteria	o__Caulobacterales	f__Caulobacteraceae	g__Caulobacter	s__Unidentified	0.00795271	0	0	0	0	0	0	0	0.0123187	0	0.0229594	0	0.00361182	0
Bacteria	p__Firmicutes	c__Bacilli	o__Lactobacillales	f__Enterococcaceae	g__Enterococcus	s__Enterococcus_E columbae	0	0.00855973	0	0	0	0	0	0	0	0.0375657	0	0	0	0
Bacteria	p__Proteobacteria	c__Alphaproteobacteria	o__Rhizobiales	f__Rhizobiaceae	g__Mesorhizobium	s__Unidentified	0.00450419	0	0.00771699	0	0	0	0.00971067	0	0	0	0.0110906	0	0.0123562	0
Bacteria	p__Firmicutes	c__Clostridia	o__Tissierellales	f__Peptoniphilaceae	g__Parvimonas	s__Parvimonas micra	0	0.00818757	0	0.00468575	0	0	0	0.000531773	0	0	0	0	0	0.0315575
Bacteria	p__Bacteroidota	c__Bacteroidia	o__Cytophagales	f__Spirosomaceae	g__Dyadobacter	s__Unidentified	0	0	0	0	0.00723597	0	0	0	0.0210445	0	0.0160521	0	0	0
Bacteria	p__Proteobacteria	c__Gammaproteobacteria	o__Burkholderiales	f__Neisseriaceae	g__Eikenella	s__Eikenella corrodens	0	0.0167473	0	0.00234287	0	0.016497	0	0	0	0.00826446	0	0	0	0
Bacteria	p__Proteobacteria	c__Gammaproteobacteria	o__Xanthomonadales	f__Xanthomonadaceae	g__Stenotrophomonas	s__Unidentified	0.0020175	0	0	0.00560253	0.0221335	0	0	0.012962	0	0	0	0	0	0
Bacteria	p__Bacteroidota	c__Bacteroidia	o__Bacteroidales	f__Bacteroidaceae	g__Prevotella	s__Unidentified	0	0	0	0.0077926	0	0.029129	0	0.00452007	0	0	0	0	0	0
Bacteria	p__Firmicutes	c__Negativicutes	o__Acidaminococcales	f__Acidaminococcaceae	g__CAG-266	s__CAG-266 sp905207485	0	0	0	0.00305592	0	0	0	0.00245945	0	0	0	0.0339506	0	0
Bacteria	p__Proteobacteria	c__Alphaproteobacteria	o__Caulobacterales	f__Caulobacteraceae	g__Asticcacaulis	s__Asticcacaulis biprosthecium	0.00321393	0	0	0	0	0	0	0	0.0151418	0	0	0	0.0172037	0
Bacteria	p__Firmicutes	c__Negativicutes	o__Veillonellales	f__Veillonellaceae	g__Veillonella	s__Unidentified	0	0	0	0	0	0	0	0	0	0.0341848	0	0	0.000380192	0
Bacteria	p__Proteobacteria	c__Gammaproteobacteria	o__Pseudomonadales	f__Moraxellaceae	g__Acinetobacter	s__Unidentified	0	0	0.00251452	0	0.0142059	0	0.00333649	0	0.00609521	0	0.00826929	0	0	0
Bacteria	p__Firmicutes	c__Bacilli	o__Lactobacillales	f__Aerococcaceae	g__Granulicatella	s__Granulicatella elegans	0	0	0	0	0	0.0053733	0	0	0	0.0281743	0	0	0	0
Bacteria	p__Proteobacteria	c__Alphaproteobacteria	o__Sphingomonadales	f__Sphingomonadaceae	g__Sphingomonas	s__Sphingomonas abaci	0	0	0.0330356	0	0	0	0	0	0	0	0	0	0	0
Bacteria	p__Bacteroidota	c__Bacteroidia	o__Chitinophagales	f__Chitinophagaceae	g__Niastella	s__Unidentified	0	0	0	0	0	0	0.0101589	0	0	0	0	0	0.0202452	0
Bacteria	p__Proteobacteria	c__Gammaproteobacteria	o__Burkholderiales	f__Burkholderiaceae	g__Cupriavidus	s__Cupriavidus taiwanensis	0	0	0	0.00295406	0.0227188	0	0	0	0.00410625	0	0	0	0	0
Bacteria	p__Firmicutes	c__Bacilli	o__Lactobacillales	f__Lactobacillaceae	g__Limosilactobacillus	s__Unidentified	0	0	0	0	0	0.0292232	0	0	0	0	0	0	0	0
Bacteria	p__Proteobacteria	c__Alphaproteobacteria	o__Caulobacterales	f__Caulobacteraceae	g__Brevundimonas	s__Unidentified	0	0	0	0.0283182	0	0	0	0	0	0	0	0	0	0
Bacteria	p__Bacteroidota	c__Bacteroidia	o__Bacteroidales	f__Porphyromonadaceae	g__Porphyromonas	s__Porphyromonas sp000467855	0	0	0	0	0	0.0156486	0	0	0.00250225	0	0	0	0	0.00950119
Bacteria	p__Actinobacteriota	c__Actinomycetia	o__Actinomycetales	f__Micrococcaceae	g__Paenarthrobacter	s__Paenarthrobacter ureafaciens	0	0	0	0	0	0	0	0	0.0271397	0	0	0	0	0
Bacteria	p__Proteobacteria	c__Gammaproteobacteria	o__Burkholderiales	f__Burkholderiaceae	g__Massilia	s__Massilia sp000745265	0	0	0	0	0	0	0.0266919	0	0	0	0	0	0	0
Bacteria	p__Proteobacteria	c__Alphaproteobacteria	o__Rhizobiales	f__Devosiaceae	g__Devosia	s__Devosia_A sp001425235	0.00382387	0	0	0	0	0	0	0	0	0	0.0227649	0	0	0
Bacteria	p__Proteobacteria	c__Alphaproteobacteria	o__Rhizobiales	f__Devosiaceae	g__Devosia	s__Devosia sp900110945	0	0	0	0	0.0133546	0	0	0	0.0130245	0	0	0	0	0
Bacteria	p__Proteobacteria	c__Gammaproteobacteria	o__Enterobacterales	f__Enterobacteriaceae	g__Klebsiella	s__Unidentified	0	0	0	0	0	0.025641	0	0	0	0	0	0	0	0
Bacteria	p__Bacteroidota	c__Bacteroidia	o__Bacteroidales	f__Bacteroidaceae	g__Bacteroides	s__Unidentified	0	0	0	0.00758888	0	0	0	0.00186121	0	0.014275	0	0	0	0
Bacteria	p__Proteobacteria	c__Gammaproteobacteria	o__Burkholderiales	f__Burkholderiaceae	g__Variovorax	s__Variovorax paradoxus	0	0	0	0	0	0	0	0	0.0227769	0	0	0	0	0
Bacteria	p__Firmicutes	c__Bacilli	o__Lactobacillales	f__Aerococcaceae	g__Abiotrophia	s__Abiotrophia defectiva	0	0	0	0	0	0.0122549	0	0	0	0.0105184	0	0	0	0
Bacteria	p__Patescibacteria	c__Saccharimonadia	o__Saccharimonadales	f__UBA4665	g__Unidentified	s__Unidentified	0.00281512	0	0.00251452	0	0.00180899	0	0.012101	0	0.00224561	0	0.000875572	0	0	0
Bacteria	p__Firmicutes	c__Clostridia	o__Oscillospirales	f__Oscillospiraceae	g__Flavonifractor	s__Flavonifractor avistercoris	0	0	0	0.000763981	0	0	0	0	0	0	0	0	0	0.0213777
Bacteria	p__Chloroflexota	c__Chloroflexia	o__Chloroflexales	f__Roseiflexaceae	g__Kouleothrix	s__Kouleothrix sp016722075	0.00159523	0	0.00390185	0	0	0	0.00542802	0	0	0	0	0	0.0107404	0
Bacteria	p__Firmicutes	c__Clostridia	o__Lachnospirales	f__Lachnospiraceae	g__Mediterraneibacter	s__Unidentified	0	0	0	0	0	0	0	0	0	0	0	0.0216049	0	0
Bacteria	p__Firmicutes	c__Clostridia	o__TANB77	f__CAG-508	g__Unidentified	s__Unidentified	0	0.016003	0	0.00173169	0	0	0	0.00372241	0	0	0	0	0	0
Bacteria	p__Proteobacteria	c__Alphaproteobacteria	o__Rhizobiales	f__Devosiaceae	g__Devosia	s__Unidentified	0.00241631	0	0.00312148	0	0.00345837	0	0	0	0.0123187	0	0	0	0	0
Bacteria	p__Proteobacteria	c__Alphaproteobacteria	o__Caulobacterales	f__Caulobacteraceae	g__Phenylobacterium	s__Phenylobacterium sp004299445	0.00297933	0	0	0	0.00686353	0	0	0	0	0	0	0	0.0114058	0
Bacteria	p__Proteobacteria	c__Gammaproteobacteria	o__Burkholderiales	f__Burkholderiaceae	g__KK5	s__KK5 sp001984095	0	0	0	0	0	0	0	0	0	0	0	0	0.0210056	0
Bacteria	p__Proteobacteria	c__Alphaproteobacteria	o__Caulobacterales	f__Caulobacteraceae	g__Brevundimonas	s__Brevundimonas vesicularis	0	0	0	0	0	0	0	0.015222	0	0.0052592	0	0	0	0
Bacteria	p__Firmicutes	c__Clostridia	o__TANB77	f__CAG-508	g__CAG-269	s__CAG-269 sp003525075	0	0.0141422	0	0.00626464	0	0	0	0	0	0	0	0	0	0
Bacteria	p__Proteobacteria	c__Gammaproteobacteria	o__Xanthomonadales	f__Xanthomonadaceae	g__Lysobacter	s__Unidentified	0.00523143	0	0.00294806	0	0.00617185	0	0.00184254	0	0	0	0	0	0.00418211	0
Bacteria	p__Firmicutes	c__Clostridia	o__Oscillospirales	f__Ruminococcaceae	g__Gemmiger	s__Unidentified	0	0	0	0.0152796	0	0	0	0.0044536	0	0	0	0	0	0
Bacteria	p__Proteobacteria	c__Gammaproteobacteria	o__Burkholderiales	f__Burkholderiaceae	g__Variovorax	s__Unidentified	0	0	0	0	0.0183559	0	0	0	0	0	0	0	0	0
Bacteria	p__Proteobacteria	c__Alphaproteobacteria	o__Unidentified	f__Unidentified	g__Unidentified	s__Unidentified	0.0176179	0	0	0	0	0	0	0	0	0	0	0	0	0
Bacteria	p__Proteobacteria	c__Gammaproteobacteria	o__Burkholderiales	f__Burkholderiaceae	g__Massilia	s__Massilia oculi	0	0	0	0	0	0	0	0	0	0	0.0169277	0	0	0
Bacteria	p__Actinobacteriota	c__Actinomycetia	o__Streptosporangiales	f__Streptosporangiaceae	g__Nonomuraea	s__Unidentified	0	0	0	0	0	0	0.0164334	0	0	0	0	0	0	0
Bacteria	p__Proteobacteria	c__Gammaproteobacteria	o__Burkholderiales	f__Burkholderiaceae	g__Ramlibacter	s__Unidentified	0.00734276	0	0	0	0.00255387	0	0	0	0	0	0	0	0.00646326	0
Bacteria	p__Patescibacteria	c__Saccharimonadia	o__Saccharimonadales	f__UBA4665	g__UBA5150	s__UBA5150 sp002792275	0	0	0	0	0	0	0	0	0	0	0.0114797	0	0.00484745	0
Bacteria	p__Bacteroidota	c__Bacteroidia	o__Chitinophagales	f__Chitinophagaceae	g__Chitinophaga	s__Unidentified	0.00121988	0	0.00476892	0	0.00335196	0	0.00229072	0	0	0	0	0	0.00313658	0
Bacteria	p__Proteobacteria	c__Gammaproteobacteria	o__Pseudomonadales	f__Moraxellaceae	g__Unidentified	s__Unidentified	0	0	0	0	0	0.00659879	0	0	0	0	0	0	0	0.00780455
Bacteria	p__Bacteroidota	c__Bacteroidia	o__Bacteroidales	f__Bacteroidaceae	g__Phocaeicola	s__Phocaeicola barnesiae	0	0	0	0.00234287	0	0	0	0.0119649	0	0	0	0	0	0
Bacteria	p__Proteobacteria	c__Gammaproteobacteria	o__Enterobacterales	f__Succinivibrionaceae	g__Anaerobiospirillum	s__Anaerobiospirillum_A thomasii	0	0	0	0	0	0	0	0	0	0	0	0	0	0.0142518
Bacteria	p__Proteobacteria	c__Alphaproteobacteria	o__Rhizobiales	f__Xanthobacteraceae	g__VAZQ01	s__VAZQ01 sp005883115	0	0	0	0.0141082	0	0	0	0	0	0	0	0	0	0
Bacteria	p__Campylobacterota	c__Campylobacteria	o__Campylobacterales	f__Campylobacteraceae	g__Campylobacter	s__Unidentified	0	0	0	0.00275033	0	0.0111237	0	0	0	0	0	0	0	0
Bacteria	p__Firmicutes	c__Bacilli	o__Acholeplasmatales	f__Anaeroplasmataceae	g__Pelethenecus	s__Pelethenecus sp910577745	0	0.0133978	0	0	0	0	0	0	0	0	0	0	0	0
Bacteria	p__Actinobacteriota	c__Actinomycetia	o__Actinomycetales	f__Actinomycetaceae	g__Arcanobacterium	s__Arcanobacterium phocae	0	0	0	0	0	0	0	0	0	0.013148	0	0	0	0
Bacteria	p__Bacteroidota	c__Bacteroidia	o__Bacteroidales	f__Bacteroidaceae	g__UBA4372	s__Unidentified	0	0	0	0	0	0	0	0	0	0.013148	0	0	0	0
Bacteria	p__Proteobacteria	c__Gammaproteobacteria	o__Burkholderiales	f__Burkholderiaceae	g__Mitsuaria	s__Mitsuaria sp900113225	0	0	0	0	0	0	0	0	0	0	0.0130363	0	0	0
Bacteria	p__Bacteroidota	c__Bacteroidia	o__Bacteroidales	f__Bacteroidaceae	g__Bacteroides	s__Bacteroides togonis	0	0	0	0.0041255	0	0	0	0.00877426	0	0	0	0	0	0
Bacteria	p__Firmicutes	c__Clostridia	o__Oscillospirales	f__Oscillospiraceae	g__Flavonifractor	s__Flavonifractor sp002159455	0	0	0	0.00835286	0	0	0	0.00425419	0	0	0	0	0	0
Bacteria	p__Proteobacteria	c__Gammaproteobacteria	o__Burkholderiales	f__Burkholderiaceae	g__Achromobacter	s__Unidentified	0	0	0	0.00183355	0	0	0	0	0.00994482	0	0	0	0	0
Bacteria	p__Bacteroidota	c__Bacteroidia	o__Bacteroidales	f__Unidentified	g__Unidentified	s__Unidentified	0	0	0	0.00275033	0	0	0	0.00438713	0	0	0	0	0	0.00407194
Bacteria	p__Bacteroidota	c__Bacteroidia	o__Bacteroidales	f__Porphyromonadaceae	g__Porphyromonas	s__Porphyromonas endodontalis	0	0	0	0.00305592	0	0.00754148	0	0	0.000513281	0	0	0	0	0
Bacteria	p__Proteobacteria	c__Alphaproteobacteria	o__Sphingomonadales	f__Sphingomonadaceae	g__Sphingopyxis	s__Unidentified	0	0	0	0	0	0	0	0	0.0109714	0	0	0	0	0
Bacteria	p__Proteobacteria	c__Gammaproteobacteria	o__Xanthomonadales	f__Xanthomonadaceae	g__Pseudoxanthomonas	s__Unidentified	0	0	0	0	0.0109072	0	0	0	0	0	0	0	0	0
Bacteria	p__Proteobacteria	c__Gammaproteobacteria	o__Xanthomonadales	f__Xanthomonadaceae	g__Lysobacter	s__Lysobacter_A helvus	0.00319047	0	0	0	0	0	0	0	0	0	0.00739372	0	0	0
Bacteria	p__Bacteroidota	c__Bacteroidia	o__Flavobacteriales	f__Flavobacteriaceae	g__Unidentified	s__Unidentified	0	0	0	0	0	0	0	0	0	0	0	0	0	0.0105192
Bacteria	p__Actinobacteriota	c__Actinomycetia	o__Mycobacteriales	f__Mycobacteriaceae	g__Mycobacterium	s__Unidentified	0	0	0	0.0102883	0	0	0	0	0	0	0	0	0	0
Bacteria	p__Firmicutes	c__Bacilli	o__Lactobacillales	f__Aerococcaceae	g__Aerococcus	s__Unidentified	0	0	0	0	0	0.010181	0	0	0	0	0	0	0	0
Bacteria	p__Firmicutes	c__Bacilli	o__Staphylococcales	f__Gemellaceae	g__Gemella	s__Gemella morbillorum	0	0	0	0	0	0.010181	0	0	0	0	0	0	0	0
Bacteria	p__Firmicutes	c__Clostridia	o__Lachnospirales	f__Lachnospiraceae	g__Mediterraneibacter	s__Mediterraneibacter caccavium	0	0	0	0	0	0	0	0.0101037	0	0	0	0	0	0
Bacteria	p__Proteobacteria	c__Unidentified	o__Unidentified	f__Unidentified	g__Unidentified	s__Unidentified	0.00412884	0	0	0.00595905	0	0	0	0	0	0	0	0	0	0
Bacteria	p__Bacteroidota	c__Bacteroidia	o__Bacteroidales	f__Bacteroidaceae	g__Phocaeicola	s__Unidentified	0	0	0	0	0	0	0	0.00983781	0	0	0	0	0	0
Bacteria	p__Bacteroidota	c__Bacteroidia	o__Flavobacteriales	f__Weeksellaceae	g__Unidentified	s__Unidentified	0	0	0	0	0	0	0	0	0	0	0.00739372	0	0	0.0023753
Bacteria	p__Firmicutes	c__Clostridia	o__Oscillospirales	f__Oscillospiraceae	g__Lawsonibacter	s__Unidentified	0	0	0	0	0	0	0	0.00963839	0	0	0	0	0	0
Bacteria	p__Proteobacteria	c__Alphaproteobacteria	o__Sphingomonadales	f__Sphingomonadaceae	g__Tsuneonella	s__Tsuneonella troitsensis	0	0	0	0	0.00952381	0	0	0	0	0	0	0	0	0
Bacteria	p__Firmicutes	c__Clostridia	o__Peptostreptococcales	f__Peptostreptococcaceae	g__Peptostreptococcus	s__Unidentified	0	0	0	0	0	0.00942685	0	0	0	0	0	0	0	0
Bacteria	p__Bacteroidota	c__Bacteroidia	o__Flavobacteriales	f__Weeksellaceae	g__Chryseobacterium	s__Unidentified	0	0	0.0011272	0.00825099	0	0	0	0	0	0	0	0	0	0
Bacteria	p__Firmicutes	c__Bacilli	o__Exiguobacterales	f__Exiguobacteraceae	g__Exiguobacterium	s__Exiguobacterium_A indicum	0	0	0.00329489	0	0.00542698	0	0	0	0.000641601	0	0	0	0	0
Bacteria	p__Bacteroidota	c__Bacteroidia	o__Flavobacteriales	f__Weeksellaceae	g__Bergeyella	s__Bergeyella_A cardium	0	0.00930406	0	0	0	0	0	0	0	0	0	0	0	0
Bacteria	p__Bacteroidota	c__Bacteroidia	o__Bacteroidales	f__Bacteroidaceae	g__Phocaeicola	s__Phocaeicola vulgatus	0	0	0	0.00926963	0	0	0	0	0	0	0	0	0	0
Bacteria	p__Bacteroidota	c__Bacteroidia	o__Bacteroidales	f__Muribaculaceae	g__Sodaliphilus	s__Sodaliphilus sp004557565	0	0	0	0.00280126	0	0	0	0	0	0	0	0	0	0.00644723
Bacteria	p__Proteobacteria	c__Alphaproteobacteria	o__Rhodobacterales	f__Rhodobacteraceae	g__Paracoccus	s__Paracoccus halophilus	0	0	0	0	0	0	0	0	0.00923906	0	0	0	0	0
Bacteria	p__Bacteroidota	c__Bacteroidia	o__Bacteroidales	f__Bacteroidaceae	g__Alloprevotella	s__Alloprevotella sp000318095	0	0	0	0.00616278	0	0	0	0.00285828	0	0	0	0	0	0
Bacteria	p__Bacteroidota	c__Bacteroidia	o__Chitinophagales	f__Chitinophagaceae	g__Unidentified	s__Unidentified	0.00565369	0	0	0	0	0	0	0	0	0	0.00330771	0	0	0
Bacteria	p__Proteobacteria	c__Gammaproteobacteria	o__Burkholderiales	f__Burkholderiaceae	g__Pseudoduganella	s__Unidentified	0.00638093	0	0	0.00249567	0	0	0	0	0	0	0	0	0	0
Bacteria	p__Actinobacteriota	c__Actinomycetia	o__Mycobacteriales	f__Micromonosporaceae	g__Unidentified	s__Unidentified	0	0	0	0.00886218	0	0	0	0	0	0	0	0	0	0
Bacteria	p__Proteobacteria	c__Gammaproteobacteria	o__Burkholderiales	f__Burkholderiaceae	g__Noviherbaspirillum	s__Unidentified	0.00485608	0	0	0	0	0	0	0	0	0	0	0	0.00389697	0
Bacteria	p__Firmicutes	c__Bacilli	o__Staphylococcales	f__Staphylococcaceae	g__Staphylococcus	s__Staphylococcus capitis	0	0	0	0.00865845	0	0	0	0	0	0	0	0	0	0
Bacteria	p__Bacteroidota	c__Bacteroidia	o__Bacteroidales	f__Bacteroidaceae	g__Phocaeicola	s__Phocaeicola coprocola	0	0	0	0.00555159	0	0	0	0.0030577	0	0	0	0	0	0
Bacteria	p__Actinobacteriota	c__Actinomycetia	o__Actinomycetales	f__Micrococcaceae	g__Rothia	s__Unidentified	0	0	0	0.00860752	0	0	0	0	0	0	0	0	0	0
Bacteria	p__Firmicutes	c__Clostridia	o__Tissierellales	f__Peptoniphilaceae	g__Parvimonas	s__Parvimonas sp000214475	0	0	0	0	0	0.00857843	0	0	0	0	0	0	0	0
Bacteria	p__Proteobacteria	c__Gammaproteobacteria	o__Unidentified	f__Unidentified	g__Unidentified	s__Unidentified	0	0.00855973	0	0	0	0	0	0	0	0	0	0	0	0
Bacteria	p__Firmicutes	c__Clostridia	o__Tissierellales	f__Peptoniphilaceae	g__Helcococcus	s__Helcococcus massiliensis	0	0	0	0	0	0.00848416	0	0	0	0	0	0	0	0
Bacteria	p__Firmicutes	c__Bacilli	o__Lactobacillales	f__Streptococcaceae	g__Lactococcus	s__Unidentified	0	0	0	0	0	0	0	0	0	0	0	0	0	0.0084832
Bacteria	p__Proteobacteria	c__Alphaproteobacteria	o__Rhizobiales	f__Devosiaceae	g__Devosia	s__Devosia_A insulae	0	0	0.00398855	0	0	0	0.00438225	0	0	0	0	0	0	0
Bacteria	p__Actinobacteriota	c__Unidentified	o__Unidentified	f__Unidentified	g__Unidentified	s__Unidentified	0	0	0	0	0	0.0035822	0	0.00478596	0	0	0	0	0	0
Bacteria	p__Bacteroidota	c__Bacteroidia	o__Bacteroidales	f__UBA932	g__Coprenecus	s__Coprenecus sp902388455	0	0	0	0	0	0	0	0.00830896	0	0	0	0	0	0
Bacteria	p__Patescibacteria	c__Saccharimonadia	o__Saccharimonadales	f__UBA1020	g__UBA1020	s__Unidentified	0.00274474	0	0	0	0	0	0	0	0.00320801	0	0	0	0.0021861	0
Bacteria	p__Bacteroidota	c__Bacteroidia	o__Bacteroidales	f__Bacteroidaceae	g__Phocaeicola	s__Phocaeicola salanitronis	0	0	0	0	0	0	0	0.00791013	0	0	0	0	0	0
Bacteria	p__Proteobacteria	c__Alphaproteobacteria	o__Rhodobacterales	f__Rhodobacteraceae	g__Paracoccus	s__Unidentified	0	0	0.00242782	0	0.00548018	0	0	0	0	0	0	0	0	0
Bacteria	p__Proteobacteria	c__Gammaproteobacteria	o__Pseudomonadales	f__Moraxellaceae	g__Acinetobacter	s__Acinetobacter ursingii	0	0	0	0	0	0	0	0	0	0.00788881	0	0	0	0
Bacteria	p__Deinococcota	c__Deinococci	o__Deinococcales	f__Deinococcaceae	g__Deinococcus	s__Unidentified	0.00110259	0	0	0	0	0	0	0	0	0	0.00671272	0	0	0
Bacteria	p__Actinobacteriota	c__Actinomycetia	o__Unidentified	f__Unidentified	g__Unidentified	s__Unidentified	0	0	0	0.00774167	0	0	0	0	0	0	0	0	0	0
Bacteria	p__Bacteroidota	c__Bacteroidia	o__Bacteroidales	f__Bacteroidaceae	g__Alloprevotella	s__Alloprevotella sp900541335	0	0	0	0.00769074	0	0	0	0	0	0	0	0	0	0
Bacteria	p__Proteobacteria	c__Alphaproteobacteria	o__Rhizobiales	f__Methyloligellaceae	g__Methyloceanibacter	s__Methyloceanibacter marginalis	0	0	0	0.00753794	0	0	0	0	0	0	0	0	0	0
Bacteria	p__Bacteroidota	c__Bacteroidia	o__Chitinophagales	f__Chitinophagaceae	g__Chitinophaga	s__Chitinophaga sp012726295	0	0	0	0	0	0	0	0	0.00744258	0	0	0	0	0
Bacteria	p__Firmicutes	c__Clostridia	o__Oscillospirales	f__Ruminococcaceae	g__Faecalibacterium	s__Unidentified	0	0	0	0.00743608	0	0	0	0	0	0	0	0	0	0
Bacteria	p__Proteobacteria	c__Alphaproteobacteria	o__Rhizobiales	f__Devosiaceae	g__Unidentified	s__Unidentified	0	0	0	0	0	0	0	0	0	0	0	0	0.00722365	0
Bacteria	p__Firmicutes	c__Clostridia	o__Clostridiales	f__Clostridiaceae	g__Clostridium	s__Clostridium sp000230835	0	0	0	0.00718142	0	0	0	0	0	0	0	0	0	0
Bacteria	p__Bacteroidota	c__Bacteroidia	o__Bacteroidales	f__Rikenellaceae	g__Tidjanibacter	s__Tidjanibacter inops	0	0	0	0.00702862	0	0	0	0	0	0	0	0	0	0
Bacteria	p__Bacteroidota	c__Bacteroidia	o__Sphingobacteriales	f__Sphingobacteriaceae	g__Sphingobacterium	s__Sphingobacterium multivorum	0	0	0	0	0.00696994	0	0	0	0	0	0	0	0	0
Bacteria	p__Bacteroidota	c__Bacteroidia	o__Bacteroidales	f__Barnesiellaceae	g__Barnesiella	s__Barnesiella intestinihominis	0	0	0	0.00687583	0	0	0	0	0	0	0	0	0	0
Bacteria	p__Bacteroidota	c__Bacteroidia	o__Bacteroidales	f__Marinifilaceae	g__Odoribacter	s__Odoribacter massiliensis	0	0	0	0.00188449	0	0	0	0.00498538	0	0	0	0	0	0
Bacteria	p__Deinococcota	c__Deinococci	o__Deinococcales	f__Deinococcaceae	g__Deinococcus	s__Deinococcus_C cellulosilyticus	0.000844535	0	0.00182086	0	0	0	0	0	0	0	0.001362	0	0.00275639	0
Bacteria	p__Bacteroidota	c__Bacteroidia	o__Bacteroidales	f__Bacteroidaceae	g__Prevotella	s__Prevotella melaninogenica	0	0	0	0	0	0.00669306	0	0	0	0	0	0	0	0
Bacteria	p__Firmicutes	c__Clostridia	o__Clostridiales	f__Clostridiaceae	g__Clostridium	s__Unidentified	0	0	0	0	0	0	0	0.00651422	0	0	0	0	0	0
Bacteria	p__Bacteroidota	c__Bacteroidia	o__Bacteroidales	f__Tannerellaceae	g__Parabacteroides	s__Parabacteroides goldsteinii	0	0	0	0.00646837	0	0	0	0	0	0	0	0	0	0
Bacteria	p__Bacteroidota	c__Bacteroidia	o__Bacteroidales	f__Bacteroidaceae	g__Phocaeicola	s__Phocaeicola plebeius	0	0	0	0.00641744	0	0	0	0	0	0	0	0	0	0
Bacteria	p__Proteobacteria	c__Alphaproteobacteria	o__Rhizobiales	f__Hyphomicrobiaceae	g__Unidentified	s__Unidentified	0	0	0	0.00631558	0	0	0	0	0	0	0	0	0	0
Bacteria	p__Bacteroidota	c__Bacteroidia	o__Chitinophagales	f__Chitinophagaceae	g__Segetibacter	s__Segetibacter aerophilus	0	0	0.00624295	0	0	0	0	0	0	0	0	0	0	0
Bacteria	p__Actinobacteriota	c__Actinomycetia	o__Propionibacteriales	f__Propionibacteriaceae	g__Cutibacterium	s__Cutibacterium acnes	0	0.00446595	0	0.00173169	0	0	0	0	0	0	0	0	0	0
Bacteria	p__Bacteroidota	c__Bacteroidia	o__Flavobacteriales	f__Flavobacteriaceae	g__Flavobacterium	s__Unidentified	0	0	0	0	0	0	0	0	0.00615937	0	0	0	0	0
Bacteria	p__Firmicutes	c__Clostridia	o__Oscillospirales	f__Acutalibacteraceae	g__Caproicibacterium	s__Caproicibacterium sp902809935	0	0.00483811	0	0	0	0	0	0.00119649	0	0	0	0	0	0
Bacteria	p__Proteobacteria	c__Gammaproteobacteria	o__Burkholderiales	f__Usitatibacteraceae	g__Unidentified	s__Unidentified	0	0.0059546	0	0	0	0	0	0	0	0	0	0	0	0
Bacteria	p__Patescibacteria	c__Saccharimonadia	o__Saccharimonadales	f__UBA1020	g__UBA1020	s__UBA1020 sp002348615	0.00225209	0	0	0	0	0	0.00368508	0	0	0	0	0	0	0
Bacteria	p__Actinobacteriota	c__Actinomycetia	o__Actinomycetales	f__Microbacteriaceae	g__Agromyces	s__Unidentified	0	0	0	0	0	0	0	0	0	0	0.00593443	0	0	0
Bacteria	p__Bacteroidota	c__Bacteroidia	o__Unidentified	f__Unidentified	g__Unidentified	s__Unidentified	0	0	0	0.00590812	0	0	0	0	0	0	0	0	0	0
Bacteria	p__Desulfobacterota	c__Desulfovibrionia	o__Desulfovibrionales	f__Desulfovibrionaceae	g__Bilophila	s__Unidentified	0	0	0	0.00590812	0	0	0	0	0	0	0	0	0	0
Bacteria	p__Proteobacteria	c__Gammaproteobacteria	o__Burkholderiales	f__Burkholderiaceae	g__Acidovorax	s__Unidentified	0.00584137	0	0	0	0	0	0	0	0	0	0	0	0	0
Bacteria	p__Bacteroidota	c__Bacteroidia	o__Chitinophagales	f__Chitinophagaceae	g__JJ008	s__Unidentified	0	0	0	0	0	0.00254525	0	0	0.00327217	0	0	0	0	0
Bacteria	p__Firmicutes	c__Bacilli	o__Erysipelotrichales	f__Coprobacillaceae	g__Catenibacterium	s__Catenibacterium sp000437715	0	0	0	0.00580625	0	0	0	0	0	0	0	0	0	0
Bacteria	p__Proteobacteria	c__Gammaproteobacteria	o__Xanthomonadales	f__Xanthomonadaceae	g__Lysobacter	s__Lysobacter enzymogenes	0	0	0	0	0	0	0.00194213	0	0.00384961	0	0	0	0	0
Bacteria	p__Firmicutes	c__Bacilli	o__Lactobacillales	f__Aerococcaceae	g__Unidentified	s__Unidentified	0	0	0	0.00570439	0	0	0	0	0	0	0	0	0	0
Bacteria	p__Proteobacteria	c__Alphaproteobacteria	o__Rhizobiales	f__Beijerinckiaceae	g__Microvirga	s__Unidentified	0	0	0	0	0	0	0	0	0	0	0	0	0.00570288	0
Bacteria	p__Acidobacteriota	c__Vicinamibacteria	o__Vicinamibacterales	f__UBA2999	g__WHSN01	s__WHSN01 sp018268955	0	0	0	0.00565346	0	0	0	0	0	0	0	0	0	0
Bacteria	p__Proteobacteria	c__Alphaproteobacteria	o__Caulobacterales	f__Caulobacteraceae	g__Caulobacter	s__Caulobacter sp016467375	0	0	0	0	0	0	0.00562721	0	0	0	0	0	0	0
Bacteria	p__Gemmatimonadota	c__Gemmatimonadetes	o__Gemmatimonadales	f__Gemmatimonadaceae	g__Unidentified	s__Unidentified	0	0	0	0.00560253	0	0	0	0	0	0	0	0	0	0
Bacteria	p__Bacteroidota	c__Bacteroidia	o__Bacteroidales	f__Bacteroidaceae	g__Unidentified	s__Unidentified	0	0	0	0.00555159	0	0	0	0	0	0	0	0	0	0
Bacteria	p__Proteobacteria	c__Alphaproteobacteria	o__Sphingomonadales	f__Sphingomonadaceae	g__Tsuneonella	s__Unidentified	0	0	0	0.00555159	0	0	0	0	0	0	0	0	0	0
Bacteria	p__Proteobacteria	c__Alphaproteobacteria	o__Rhizobiales	f__Beijerinckiaceae	g__Methylobacterium	s__Methylobacterium oxalidis	0	0	0	0	0	0	0.00552761	0	0	0	0	0	0	0
Bacteria	p__Bacteroidota	c__Bacteroidia	o__Bacteroidales	f__Bacteroidaceae	g__Prevotella	s__Prevotella copri	0	0	0	0.00550066	0	0	0	0	0	0	0	0	0	0
Bacteria	p__Firmicutes	c__Clostridia	o__Oscillospirales	f__Ruminococcaceae	g__Unidentified	s__Unidentified	0	0	0	0.0053988	0	0	0	0	0	0	0	0	0	0
Bacteria	p__Firmicutes	c__Negativicutes	o__Selenomonadales	f__Selenomonadaceae	g__Megamonas	s__Megamonas funiformis	0	0	0	0.00224101	0	0	0	0.00312417	0	0	0	0	0	0
Bacteria	p__Bacteroidota	c__Bacteroidia	o__Bacteroidales	f__Muribaculaceae	g__Limisoma	s__Limisoma sp000437795	0	0	0	0.00529693	0	0	0	0	0	0	0	0	0	0
Bacteria	p__Firmicutes	c__Negativicutes	o__Selenomonadales	f__Selenomonadaceae	g__Unidentified	s__Unidentified	0	0	0	0	0	0	0	0	0	0.0052592	0	0	0	0
Bacteria	p__Bacteroidota	c__Bacteroidia	o__Bacteroidales	f__Muribaculaceae	g__Amulumruptor	s__Amulumruptor caecigallinarius	0	0	0	0.00519507	0	0	0	0	0	0	0	0	0	0
Bacteria	p__Firmicutes	c__Bacilli	o__Bacillales	f__Bacillaceae	g__Fredinandcohnia	s__Fredinandcohnia onubensis	0	0	0	0.00519507	0	0	0	0	0	0	0	0	0	0
Archaea	p__Thermoproteota	c__Bathyarchaeia	o__B26-1	f__UBA233	g__JADGNF01	s__JADGNF01 sp017883615	0	0	0	0	0	0.0050905	0	0	0	0	0	0	0	0
Bacteria	p__CSP1-3	c__CSP1-3	o__CSP1-3	f__NP-7	g__NP-7	s__NP-7 sp005883865	0	0	0	0	0	0.0050905	0	0	0	0	0	0	0	0
Bacteria	p__Proteobacteria	c__Gammaproteobacteria	o__Pseudomonadales	f__Cellvibrionaceae	g__Cellvibrio	s__Cellvibrio sp004173475	0	0	0	0	0	0.00499623	0	0	0	0	0	0	0	0
Bacteria	p__Bacteroidota	c__Bacteroidia	o__Cytophagales	f__Unidentified	g__Unidentified	s__Unidentified	0	0	0	0	0	0	0	0	0.00487617	0	0	0	0	0
Bacteria	p__Bdellovibrionota	c__Bdellovibrionia	o__Bdellovibrionales	f__Bdellovibrionaceae	g__Unidentified	s__Unidentified	0	0	0	0	0	0	0	0	0	0	0	0	0.00484745	0
Bacteria	p__Patescibacteria	c__Saccharimonadia	o__Saccharimonadales	f__Unidentified	g__Unidentified	s__Unidentified	0.000703779	0	0	0	0	0.00367647	0.000448185	0	0	0	0	0	0	0
Bacteria	p__Proteobacteria	c__Gammaproteobacteria	o__Xanthomonadales	f__Xanthomonadaceae	g__Stenotrophomonas	s__Stenotrophomonas maltophilia	0	0	0	0	0	0	0	0	0.00481201	0	0	0	0	0
Bacteria	p__Firmicutes	c__Clostridia	o__Peptostreptococcales	f__Peptostreptococcaceae	g__Romboutsia	s__Romboutsia_C hominis	0	0	0	0.00463482	0	0	0	0	0	0	0	0	0	0
Bacteria	p__Acidobacteriota	c__Acidobacteriae	o__Acidobacteriales	f__Gp1-AA117	g__Gp1-AA17	s__Gp1-AA17 sp003223515	0	0	0	0.00443109	0	0	0	0	0	0	0	0	0	0
Bacteria	p__Firmicutes	c__Bacilli	o__Erysipelotrichales	f__Erysipelotrichaceae	g__Holdemania	s__Holdemania sp900120005	0	0	0	0.00443109	0	0	0	0	0	0	0	0	0	0
Bacteria	p__Fusobacteriota	c__Fusobacteriia	o__Fusobacteriales	f__Fusobacteriaceae	g__Fusobacterium	s__Unidentified	0	0	0	0.00239381	0	0	0	0	0	0	0	0	0	0.00203597
Bacteria	p__Actinobacteriota	c__Actinomycetia	o__Mycobacteriales	f__Pseudonocardiaceae	g__Actinosynnema	s__Unidentified	0	0	0	0	0	0	0.00438225	0	0	0	0	0	0	0
Bacteria	p__Firmicutes	c__Clostridia	o__Oscillospirales	f__Oscillospiraceae	g__Unidentified	s__Unidentified	0	0	0	0.00432922	0	0	0	0	0	0	0	0	0	0
Bacteria	p__Bacteroidota	c__Bacteroidia	o__Bacteroidales	f__Bacteroidaceae	g__UBA4372	s__UBA4372 sp017547165	0	0	0	0.00432922	0	0	0	0	0	0	0	0	0	0
Bacteria	p__Nitrospirota	c__Nitrospiria	o__Nitrospirales	f__Nitrospiraceae	g__Nitrospira	s__Unidentified	0	0	0	0.00432922	0	0	0	0	0	0	0	0	0	0
Bacteria	p__Bacteroidota	c__Bacteroidia	o__Bacteroidales	f__Rikenellaceae	g__Alistipes	s__Alistipes excrementavium	0	0	0	0	0	0	0	0.00425419	0	0	0	0	0	0
Bacteria	p__Firmicutes	c__Clostridia	o__TANB77	f__CAG-508	g__CAG-273	s__CAG-273 sp003534295	0	0	0	0	0	0	0	0.00425419	0	0	0	0	0	0
Bacteria	p__Actinobacteriota	c__Actinomycetia	o__Propionibacteriales	f__Nocardioidaceae	g__Nocardioides	s__Unidentified	0.000985291	0	0.00164745	0	0	0	0.00159355	0	0	0	0	0	0	0
Bacteria	p__Firmicutes	c__Clostridia	o__Oscillospirales	f__Oscillospiraceae	g__UBA1774	s__UBA1774 sp016286665	0	0	0	0	0	0	0	0.00418772	0	0	0	0	0	0
Bacteria	p__Proteobacteria	c__Alphaproteobacteria	o__Rhizobiales	f__Hyphomicrobiaceae	g__Hyphomicrobium	s__Hyphomicrobium sp002279935	0	0	0	0	0.00409683	0	0	0	0	0	0	0	0	0
Bacteria	p__Firmicutes	c__Clostridia	o__Christensenellales	f__CAG-314	g__Fimimonas	s__Fimimonas gallinarum	0	0	0	0.00407456	0	0	0	0	0	0	0	0	0	0
Bacteria	p__Bacteroidota	c__Bacteroidia	o__Bacteroidales	f__Bacteroidaceae	g__Alloprevotella	s__Alloprevotella sp004558535	0	0	0	0.00402363	0	0	0	0	0	0	0	0	0	0
Bacteria	p__Proteobacteria	c__Alphaproteobacteria	o__Sphingomonadales	f__Sphingomonadaceae	g__Novosphingobium	s__Novosphingobium sp003454795	0.00396462	0	0	0	0	0	0	0	0	0	0	0	0	0
Archaea	p__Halobacteriota	c__Methanosarcinia	o__Methanotrichales	f__Methanotrichaceae	g__Methanothrix	s__Methanothrix soehngenii	0	0	0	0.00392177	0	0	0	0	0	0	0	0	0	0
Bacteria	p__Actinobacteriota	c__Actinomycetia	o__Streptosporangiales	f__Streptosporangiaceae	g__Unidentified	s__Unidentified	0	0	0	0.00392177	0	0	0	0	0	0	0	0	0	0
Bacteria	p__Actinobacteriota	c__Actinomycetia	o__Actinomycetales	f__Microbacteriaceae	g__Leifsonia	s__Leifsonia sp900100265	0	0	0.00390185	0	0	0	0	0	0	0	0	0	0	0
Bacteria	p__Firmicutes	c__Unidentified	o__Unidentified	f__Unidentified	g__Unidentified	s__Unidentified	0	0	0	0.0038199	0	0	0	0	0	0	0	0	0	0
Bacteria	p__Chloroflexota	c__Chloroflexia	o__Chloroflexales	f__Unidentified	g__Unidentified	s__Unidentified	0	0	0	0	0.00159617	0	0	0	0.00218144	0	0	0	0	0
Bacteria	p__Bacteroidota	c__Bacteroidia	o__Sphingobacteriales	f__Sphingobacteriaceae	g__SYSU-D00535	s__SYSU-D00535 sp017355835	0.00185329	0	0	0	0	0	0.000398387	0	0	0	0	0	0.00152077	0
Bacteria	p__Desulfobacterota	c__Binatia	o__UBA9968	f__UBA9968	g__UBA9968	s__UBA9968 sp001799045	0	0	0	0	0	0.00377074	0	0	0	0	0	0	0	0
Bacteria	p__Bacteroidota	c__Bacteroidia	o__Chitinophagales	f__Chitinophagaceae	g__Niastella	s__Niastella sp017742245	0.00375349	0	0	0	0	0	0	0	0	0	0	0	0	0
Bacteria	p__Proteobacteria	c__Alphaproteobacteria	o__Caulobacterales	f__Caulobacteraceae	g__Brevundimonas	s__Brevundimonas sp016742215	0	0	0	0	0	0	0	0	0	0	0	0	0	0.00373261
Bacteria	p__Actinobacteriota	c__Rubrobacteria	o__Rubrobacterales	f__Rubrobacteraceae	g__Rubrobacter	s__Rubrobacter_B xylanophilus	0	0.00372162	0	0	0	0	0	0	0	0	0	0	0	0
Bacteria	p__Desulfobacterota	c__Binatia	o__UBA9968	f__UBA9968	g__2-12-FULL-60-19	s__2-12-FULL-60-19 sp001798595	0	0	0	0.00371804	0	0	0	0	0	0	0	0	0	0
Bacteria	p__Chloroflexota	c__Ktedonobacteria	o__Ktedonobacterales	f__Ktedonobacteraceae	g__Ktedonobacter	s__Unidentified	0	0	0	0.00356524	0	0	0	0	0	0	0	0	0	0
Bacteria	p__Firmicutes	c__Clostridia	o__Oscillospirales	f__Unidentified	g__Unidentified	s__Unidentified	0	0	0	0.00351431	0	0	0	0	0	0	0	0	0	0
Bacteria	p__Proteobacteria	c__Alphaproteobacteria	o__Caulobacterales	f__Caulobacteraceae	g__Brevundimonas	s__Brevundimonas sp017302105	0	0	0	0	0.00351157	0	0	0	0	0	0	0	0	0
Bacteria	p__Bacteroidota	c__Bacteroidia	o__Bacteroidales	f__Muribaculaceae	g__Unidentified	s__Unidentified	0	0	0	0.00336152	0	0	0	0	0	0	0	0	0	0
Bacteria	p__Proteobacteria	c__Alphaproteobacteria	o__Rhizobiales	f__Beijerinckiaceae	g__Microvirga	s__Microvirga massiliensis	0	0	0	0.00336152	0	0	0	0	0	0	0	0	0	0
Bacteria	p__Firmicutes	c__Clostridia	o__Lachnospirales	f__Lachnospiraceae	g__Blautia	s__Blautia ornithocaccae	0	0	0	0.00320872	0	0	0	0	0	0	0	0	0	0
Bacteria	p__Bdellovibrionota	c__Bdellovibrionia	o__UBA1018	f__UBA1018	g__JABDFB01	s__JABDFB01 sp013286765	0	0	0	0.00305592	0	0	0	0	0	0	0	0	0	0
Bacteria	p__Actinobacteriota	c__Thermoleophilia	o__Unidentified	f__Unidentified	g__Unidentified	s__Unidentified	0	0	0	0.00305592	0	0	0	0	0	0	0	0	0	0
Bacteria	p__Fusobacteriota	c__Fusobacteriia	o__Fusobacteriales	f__Leptotrichiaceae	g__Leptotrichia	s__Leptotrichia trevisanii	0	0.0029773	0	0	0	0	0	0	0	0	0	0	0	0
Bacteria	p__Bacteroidota	c__Bacteroidia	o__Chitinophagales	f__Chitinophagaceae	g__Chitinophaga	s__Chitinophaga rupis	0.00140756	0	0	0	0	0	0.00154375	0	0	0	0	0	0	0
Bacteria	p__CSP1-3	c__CSP1-3	o__CSP1-3	f__CSP1-3	g__VGFA01	s__VGFA01 sp016869025	0	0	0	0	0	0.00292232	0	0	0	0	0	0	0	0
Bacteria	p__Firmicutes	c__Clostridia	o__Oscillospirales	f__Oscillospiraceae	g__Dysosmobacter	s__Dysosmobacter avistercoris	0	0	0	0.0028522	0	0	0	0	0	0	0	0	0	0
Bacteria	p__Planctomycetota	c__Planctomycetia	o__Gemmatales	f__Gemmataceae	g__REEB421	s__REEB421 sp018970845	0	0	0	0.00280126	0	0	0	0	0	0	0	0	0	0
Bacteria	p__Firmicutes	c__Bacilli	o__Paenibacillales	f__Paenibacillaceae	g__Paenibacillus	s__Unidentified	0	0	0	0.00280126	0	0	0	0	0	0	0	0	0	0
Bacteria	p__Firmicutes	c__Clostridia	o__Peptostreptococcales	f__Peptostreptococcaceae	g__Terrisporobacter	s__Terrisporobacter othiniensis	0	0	0	0.00275033	0	0	0	0	0	0	0	0	0	0
Bacteria	p__Proteobacteria	c__Gammaproteobacteria	o__Pseudomonadales	f__Pseudomonadaceae	g__Pseudomonas	s__Pseudomonas_B oryzihabitans	0.00107913	0	0.00164745	0	0	0	0	0	0	0	0	0	0	0
Bacteria	p__Firmicutes	c__Bacilli	o__Bacillales	f__Bacillaceae	g__Bacillus	s__Unidentified	0	0	0	0.0026994	0	0	0	0	0	0	0	0	0	0
Bacteria	p__Firmicutes	c__Bacilli	o__Lactobacillales	f__Lactobacillaceae	g__Ligilactobacillus	s__Ligilactobacillus aviarius	0	0	0	0	0	0	0	0.00265887	0	0	0	0	0	0
Bacteria	p__Proteobacteria	c__Gammaproteobacteria	o__Burkholderiales	f__Burkholderiaceae	g__Ramlibacter	s__Ramlibacter tataouinensis	0.00262744	0	0	0	0	0	0	0	0	0	0	0	0	0
Bacteria	p__Bacteroidota	c__Bacteroidia	o__Flavobacteriales	f__Weeksellaceae	g__Chryseobacterium	s__Chryseobacterium arthrosphaerae	0	0	0	0	0.00260708	0	0	0	0	0	0	0	0	0
Bacteria	p__Myxococcota	c__Polyangia	o__Palsa-1104	f__Fen-1088	g__Fen-1137	s__Fen-1137 sp003142855	0	0	0	0.0025466	0	0	0	0	0	0	0	0	0	0
Bacteria	p__Bacteroidota	c__Bacteroidia	o__Chitinophagales	f__Chitinophagaceae	g__Flavipsychrobacter	s__Flavipsychrobacter sp903824665	0	0	0	0.0025466	0	0	0	0	0	0	0	0	0	0
Bacteria	p__Firmicutes	c__Clostridia	o__Christensenellales	f__CAG-74	g__UBA11524	s__UBA11524 sp000437595	0	0	0	0.0025466	0	0	0	0	0	0	0	0	0	0
Bacteria	p__Firmicutes	c__Clostridia	o__Peptostreptococcales	f__Anaerovoracaceae	g__Unidentified	s__Unidentified	0	0	0	0.0025466	0	0	0	0	0	0	0	0	0	0
Bacteria	p__Proteobacteria	c__Alphaproteobacteria	o__Azospirillales	f__Azospirillaceae	g__Azospirillum	s__Unidentified	0	0	0	0	0	0	0	0	0.00250225	0	0	0	0	0
Bacteria	p__Firmicutes	c__Bacilli	o__RF39	f__UBA660	g__Unidentified	s__Unidentified	0	0	0	0.00249567	0	0	0	0	0	0	0	0	0	0
Bacteria	p__Synergistota	c__Synergistia	o__Synergistales	f__Aminobacteriaceae	g__Aminivibrio	s__Aminivibrio pyruvatiphilus	0	0	0	0.00244474	0	0	0	0	0	0	0	0	0	0
Bacteria	p__Fusobacteriota	c__Fusobacteriia	o__Fusobacteriales	f__Fusobacteriaceae	g__Fusobacterium	s__Fusobacterium_B sp010367435	0	0	0	0.00244474	0	0	0	0	0	0	0	0	0	0
Bacteria	p__Proteobacteria	c__Gammaproteobacteria	o__Burkholderiales	f__Burkholderiaceae	g__Paenalcaligenes	s__Unidentified	0	0	0	0.00244474	0	0	0	0	0	0	0	0	0	0
Bacteria	p__Desulfobacterota	c__Binatia	o__UBA9968	f__UBA9968	g__Unidentified	s__Unidentified	0	0	0	0.00244474	0	0	0	0	0	0	0	0	0	0
Bacteria	p__Proteobacteria	c__Gammaproteobacteria	o__Steroidobacterales	f__Steroidobacteraceae	g__Steroidobacter	s__Steroidobacter denitrificans	0	0	0	0	0	0	0	0	0.00237393	0	0	0	0	0
Bacteria	p__Proteobacteria	c__Alphaproteobacteria	o__Caulobacterales	f__Caulobacteraceae	g__Brevundimonas	s__Brevundimonas fluminis	0.00236939	0	0	0	0	0	0	0	0	0	0	0	0	0
Bacteria	p__CSP1-3	c__CSP1-3	o__CSP1-3	f__13-1-40CM-64-14	g__NP-4	s__NP-4 sp005882295	0	0	0	0	0	0.00235671	0	0	0	0	0	0	0	0
Bacteria	p__Acidobacteriota	c__Acidobacteriae	o__Unidentified	f__Unidentified	g__Unidentified	s__Unidentified	0	0	0	0.00234287	0	0	0	0	0	0	0	0	0	0
Bacteria	p__Gemmatimonadota	c__Gemmatimonadetes	o__Gemmatimonadales	f__Gemmatimonadaceae	g__SCN-70-22	s__SCN-70-22 sp016704465	0	0	0	0.00229194	0	0	0	0	0	0	0	0	0	0
Bacteria	p__Firmicutes	c__Bacilli	o__Erysipelotrichales	f__Erysipelotrichaceae	g__Allobaculum	s__Allobaculum sp015233825	0	0	0	0.00219008	0	0	0	0	0	0	0	0	0	0
Bacteria	p__Chloroflexota	c__Unidentified	o__Unidentified	f__Unidentified	g__Unidentified	s__Unidentified	0	0	0	0	0	0.00216817	0	0	0	0	0	0	0	0
Bacteria	p__Bacteroidota	c__Bacteroidia	o__Chitinophagales	f__Chitinophagaceae	g__Flavisolibacter	s__Flavisolibacter ginsenosidimutans	0	0	0	0	0	0	0.00214133	0	0	0	0	0	0	0
Bacteria	p__Proteobacteria	c__Alphaproteobacteria	o__RF32	f__CAG-239	g__Scatocola	s__Scatocola faecipullorum	0	0	0	0.00213915	0	0	0	0	0	0	0	0	0	0
Bacteria	p__Acidobacteriota	c__Vicinamibacteria	o__Vicinamibacterales	f__Vicinamibacteraceae	g__Luteitalea	s__Unidentified	0	0	0	0	0.000798085	0	0	0	0.0012832	0	0	0	0	0
Bacteria	p__Proteobacteria	c__Gammaproteobacteria	o__Steroidobacterales	f__Steroidobacteraceae	g__Steroidobacter	s__Unidentified	0	0	0.000867077	0	0.00117052	0	0	0	0	0	0	0	0	0
Bacteria	p__Bacteroidota	c__Bacteroidia	o__Bacteroidales	f__Marinifilaceae	g__Butyricimonas	s__Butyricimonas paravirosa	0	0	0	0.00203728	0	0	0	0	0	0	0	0	0	0
Bacteria	p__Planctomycetota	c__SZUA-567	o__SZUA-567	f__SZUA-567	g__SZUA-421	s__SZUA-421 sp003245715	0	0	0	0.00203728	0	0	0	0	0	0	0	0	0	0
Bacteria	p__Firmicutes	c__Clostridia	o__Oscillospirales	f__Acutalibacteraceae	g__Fimenecus	s__Fimenecus sp000432435	0	0	0	0.00198635	0	0	0	0	0	0	0	0	0	0
Bacteria	p__Fusobacteriota	c__Fusobacteriia	o__Fusobacteriales	f__Fusobacteriaceae	g__Fusobacterium	s__Fusobacterium_B sp900541465	0	0	0	0.00193542	0	0	0	0	0	0	0	0	0	0
Bacteria	p__Proteobacteria	c__Gammaproteobacteria	o__Burkholderiales	f__Unidentified	g__Unidentified	s__Unidentified	0	0	0	0.00188449	0	0	0	0	0	0	0	0	0	0
Bacteria	p__Acidobacteriota	c__Vicinamibacteria	o__Vicinamibacterales	f__UBA2999	g__Gp6-AA40	s__Gp6-AA40 sp013140775	0	0	0	0.00183355	0	0	0	0	0	0	0	0	0	0
Bacteria	p__Firmicutes	c__Negativicutes	o__Selenomonadales	f__Selenomonadaceae	g__Megamonas	s__Megamonas hypermegale	0	0	0	0	0	0	0	0.00179474	0	0	0	0	0	0
Bacteria	p__Bacteroidota	c__Bacteroidia	o__Flavobacteriales	f__Flavobacteriaceae	g__Flavobacterium	s__Flavobacterium johnsoniae	0	0	0	0.00178262	0	0	0	0	0	0	0	0	0	0
Bacteria	p__Proteobacteria	c__Alphaproteobacteria	o__Sphingomonadales	f__Sphingomonadaceae	g__Sphingopyxis	s__Sphingopyxis sp001468225	0	0	0	0	0.00175579	0	0	0	0	0	0	0	0	0
Bacteria	p__Planctomycetota	c__Phycisphaerae	o__Phycisphaerales	f__Unidentified	g__Unidentified	s__Unidentified	0	0	0	0	0	0	0	0	0.00173232	0	0	0	0	0
Bacteria	p__Firmicutes	c__Clostridia	o__Oscillospirales	f__Oscillospiraceae	g__Faecousia	s__Faecousia sp000434635	0	0	0	0.00173169	0	0	0	0	0	0	0	0	0	0
Bacteria	p__Acidobacteriota	c__Acidobacteriae	o__Bryobacterales	f__Bryobacteraceae	g__VFZY01	s__VFZY01 sp016870915	0	0	0	0.00173169	0	0	0	0	0	0	0	0	0	0
Bacteria	p__Planctomycetota	c__Planctomycetia	o__Gemmatales	f__Gemmataceae	g__Gemmata	s__Unidentified	0	0	0	0.00173169	0	0	0	0	0	0	0	0	0	0
Bacteria	p__Acidobacteriota	c__Blastocatellia	o__Pyrinomonadales	f__Pyrinomonadaceae	g__Unidentified	s__Unidentified	0	0	0	0	0.00170258	0	0	0	0	0	0	0	0	0
Bacteria	p__Actinobacteriota	c__Actinomycetia	o__Propionibacteriales	f__Nocardioidaceae	g__Aeromicrobium	s__Unidentified	0	0	0	0.00168076	0	0	0	0	0	0	0	0	0	0
Bacteria	p__Bacteroidota	c__Bacteroidia	o__Bacteroidales	f__Tannerellaceae	g__Parabacteroides	s__Parabacteroides sp002159645	0	0	0	0	0	0	0	0.00166179	0	0	0	0	0	0
Bacteria	p__Firmicutes	c__Clostridia	o__Lachnospirales	f__Lachnospiraceae	g__Merdisoma	s__Unidentified	0	0	0	0	0	0	0	0.00166179	0	0	0	0	0	0
Bacteria	p__Actinobacteriota	c__Actinomycetia	o__Mycobacteriales	f__Mycobacteriaceae	g__Corynebacterium	s__Unidentified	0	0	0	0.00162983	0	0	0	0	0	0	0	0	0	0
Bacteria	p__Proteobacteria	c__Alphaproteobacteria	o__Reyranellales	f__Reyranellaceae	g__SYSU-D60007	s__SYSU-D60007 sp008039615	0	0	0	0.000967709	0.000638468	0	0	0	0	0	0	0	0	0
Bacteria	p__Actinobacteriota	c__Actinomycetia	o__Mycobacteriales	f__Micromonosporaceae	g__Glycomyces	s__Glycomyces sambucus	0	0	0	0	0	0	0	0	0.001604	0	0	0	0	0
Bacteria	p__Actinobacteriota	c__Actinomycetia	o__Actinomycetales	f__Actinomycetaceae	g__Actinomyces	s__Actinomyces oris	0	0	0	0	0	0.00160256	0	0	0	0	0	0	0	0
Bacteria	p__Actinobacteriota	c__Acidimicrobiia	o__IMCC26256	f__PALSA-555	g__SHVJ01	s__SHVJ01 sp016870355	0	0	0	0.00157889	0	0	0	0	0	0	0	0	0	0
Bacteria	p__Actinobacteriota	c__Thermoleophilia	o__Solirubrobacterales	f__Solirubrobacteraceae	g__Solirubrobacter	s__Solirubrobacter sp000425945	0	0	0	0.00157889	0	0	0	0	0	0	0	0	0	0
Bacteria	p__Proteobacteria	c__Gammaproteobacteria	o__Burkholderiales	f__Rhodocyclaceae	g__Unidentified	s__Unidentified	0	0	0	0.00157889	0	0	0	0	0	0	0	0	0	0
Bacteria	p__Patescibacteria	c__Saccharimonadia	o__Saccharimonadales	f__UBA1020	g__UBA1020	s__UBA1020 sp000503915	0	0	0	0	0.00154296	0	0	0	0	0	0	0	0	0
Bacteria	p__Firmicutes	c__Clostridia	o__Oscillospirales	f__Butyricicoccaceae	g__Butyricicoccus	s__Butyricicoccus_A porcorum	0	0	0	0	0	0	0	0.00152885	0	0	0	0	0	0
Bacteria	p__Actinobacteriota	c__Actinomycetia	o__Actinomycetales	f__Actinomycetaceae	g__Mobiluncus	s__Unidentified	0	0	0	0.00152796	0	0	0	0	0	0	0	0	0	0
Bacteria	p__Proteobacteria	c__Gammaproteobacteria	o__Steroidobacterales	f__Steroidobacteraceae	g__13-2-20CM-66-19	s__13-2-20CM-66-19 sp001914695	0.00035189	0	0	0	0	0	0	0	0	0	0	0	0.00114058	0
Bacteria	p__Firmicutes	c__Bacilli	o__RF39	f__UBA660	g__Onthocola	s__Onthocola_B stercorigallinarum	0	0.00148865	0	0	0	0	0	0	0	0	0	0	0	0
Bacteria	p__Chloroflexota	c__Limnocylindria	o__Limnocylindrales	f__CSP1-4	g__UBA5189	s__UBA5189 sp013822395	0	0	0	0.00147703	0	0	0	0	0	0	0	0	0	0
Bacteria	p__Proteobacteria	c__Gammaproteobacteria	o__Burkholderiales	f__Casimicrobiaceae	g__VBCG01	s__Unidentified	0	0	0	0.00147703	0	0	0	0	0	0	0	0	0	0
Bacteria	p__Firmicutes	c__Clostridia	o__Unidentified	f__Unidentified	g__Unidentified	s__Unidentified	0	0	0	0.0014261	0	0	0	0	0	0	0	0	0	0
Bacteria	p__Proteobacteria	c__Gammaproteobacteria	o__Burkholderiales	f__Burkholderiaceae	g__Acidovorax	s__Acidovorax_A avenae	0.00140756	0	0	0	0	0	0	0	0	0	0	0	0	0
Bacteria	p__Firmicutes	c__Clostridia	o__Oscillospirales	f__Ruminococcaceae	g__Avimicrobium	s__Avimicrobium caecorum	0	0	0	0	0	0	0	0.00139591	0	0	0	0	0	0
Bacteria	p__Firmicutes	c__Clostridia	o__Christensenellales	f__CAG-917	g__CAG-475	s__Unidentified	0	0	0	0	0	0	0	0.00139591	0	0	0	0	0	0
Bacteria	p__Proteobacteria	c__Alphaproteobacteria	o__Azospirillales	f__Azospirillaceae	g__Skermanella	s__Unidentified	0.00136064	0	0	0	0	0	0	0	0	0	0	0	0	0
Bacteria	p__Proteobacteria	c__Alphaproteobacteria	o__Azospirillales	f__Azospirillaceae	g__Aerophototrophica	s__Aerophototrophica crusticola	0	0	0	0	0	0	0	0	0.00134736	0	0	0	0	0
Bacteria	p__Bacteroidota	c__Bacteroidia	o__Cytophagales	f__Cyclobacteriaceae	g__Chryseolinea	s__Chryseolinea sp016735595	0	0	0	0	0.00133014	0	0	0	0	0	0	0	0	0
Bacteria	p__Myxococcota	c__Polyangia	o__Haliangiales	f__Haliangiaceae	g__JABFXX01	s__JABFXX01 sp018058095	0	0	0	0	0.00133014	0	0	0	0	0	0	0	0	0
Bacteria	p__Bacteroidota	c__Bacteroidia	o__Bacteroidales	f__Bacteroidaceae	g__UBA6398	s__UBA6398 sp002451695	0	0	0	0	0	0	0	0.00132943	0	0	0	0	0	0
Bacteria	p__Bacteroidota	c__Bacteroidia	o__Bacteroidales	f__Bacteroidaceae	g__Phocaeicola	s__Phocaeicola_A sp003489705	0	0	0	0	0	0	0	0.00132943	0	0	0	0	0	0
Bacteria	p__Actinobacteriota	c__UBA4738	o__UBA4738	f__HRBIN12	g__DSJA01	s__DSJA01 sp011054185	0	0	0	0.00132423	0	0	0	0	0	0	0	0	0	0
Bacteria	p__Proteobacteria	c__Gammaproteobacteria	o__Xanthomonadales	f__Rhodanobacteraceae	g__Frateuria	s__Unidentified	0	0	0	0	0	0	0.00129476	0	0	0	0	0	0	0
Bacteria	p__Bacteroidota	c__Bacteroidia	o__Sphingobacteriales	f__Sphingobacteriaceae	g__SYSU-D00535	s__SYSU-D00535 sp017355785	0	0	0	0	0	0	0	0	0.0012832	0	0	0	0	0
Bacteria	p__Firmicutes	c__Clostridia	o__Oscillospirales	f__Oscillospiraceae	g__Dysosmobacter	s__Unidentified	0	0	0	0	0	0	0	0.00126296	0	0	0	0	0	0
Bacteria	p__Verrucomicrobiota	c__Verrucomicrobiae	o__Opitutales	f__Opitutaceae	g__Unidentified	s__Unidentified	0	0	0.000606954	0	0	0	0.000647378	0	0	0	0	0	0	0
Bacteria	p__Bacteroidota	c__Bacteroidia	o__Bacteroidales	f__Rikenellaceae	g__Alistipes	s__Alistipes sp002358415	0	0	0	0.00117144	0	0	0	0	0	0	0	0	0	0
Bacteria	p__Actinobacteriota	c__Actinomycetia	o__Streptomycetales	f__Streptomycetaceae	g__Unidentified	s__Unidentified	0	0	0	0.00117144	0	0	0	0	0	0	0	0	0	0
Bacteria	p__Bacteroidota	c__Bacteroidia	o__Chitinophagales	f__Chitinophagaceae	g__Sediminibacterium	s__Unidentified	0.00114951	0	0	0	0	0	0	0	0	0	0	0	0	0
Bacteria	p__Bacteroidota	c__Bacteroidia	o__Bacteroidales	f__Bacteroidaceae	g__Prevotella	s__Prevotella oris	0	0	0	0	0	0.00113122	0	0	0	0	0	0	0	0
Bacteria	p__Firmicutes	c__Clostridia	o__Lachnospirales	f__Lachnospiraceae	g__Lachnoanaerobaculum	s__Lachnoanaerobaculum orale	0	0	0	0	0	0.00113122	0	0	0	0	0	0	0	0
Bacteria	p__Firmicutes	c__Bacilli	o__ML615J-28	f__CAG-698	g__Unidentified	s__Unidentified	0	0	0	0.00106957	0	0	0	0	0	0	0	0	0	0
Bacteria	p__Firmicutes	c__Negativicutes	o__Veillonellales	f__Megasphaeraceae	g__Megasphaera	s__Megasphaera stantonii	0	0	0	0	0	0	0	0.00106355	0	0	0	0	0	0
Bacteria	p__Verrucomicrobiota	c__Verrucomicrobiae	o__Verrucomicrobiales	f__Akkermansiaceae	g__Unidentified	s__Unidentified	0	0	0	0	0	0	0	0	0.00102656	0	0	0	0	0
Bacteria	p__Firmicutes	c__Clostridia	o__Oscillospirales	f__Ruminococcaceae	g__UBA866	s__UBA866 sp016901855	0	0	0	0.00101864	0	0	0	0	0	0	0	0	0	0
Bacteria	p__Firmicutes	c__Bacilli	o__Erysipelotrichales	f__Erysipelotrichaceae	g__Allobaculum	s__Allobaculum stercoricanis	0	0	0	0	0	0	0	0	0	0	0	0	0	0.00101798
Bacteria	p__Proteobacteria	c__Alphaproteobacteria	o__Sphingomonadales	f__Sphingomonadaceae	g__Sandaracinobacter	s__Sandaracinobacter neustonicus	0	0	0	0	0	0	0	0	0.000962402	0	0	0	0	0
Bacteria	p__Actinobacteriota	c__Actinomycetia	o__Actinomycetales	f__Bifidobacteriaceae	g__Unidentified	s__Unidentified	0	0	0	0.000916777	0	0	0	0	0	0	0	0	0	0
Bacteria	p__Bacteroidota	c__Bacteroidia	o__Chitinophagales	f__Chitinophagaceae	g__Lacibacter	s__Lacibacter cauensis	0	0	0	0	0.000904496	0	0	0	0	0	0	0	0	0
Bacteria	p__Proteobacteria	c__Alphaproteobacteria	o__Rhizobiales	f__Xanthobacteraceae	g__Unidentified	s__Unidentified	0	0	0	0.000865845	0	0	0	0	0	0	0	0	0	0
Bacteria	p__Bdellovibrionota	c__Bdellovibrionia	o__Bdellovibrionales	f__Bdellovibrionaceae	g__UBA2316	s__UBA2316 sp002256935	0.000844535	0	0	0	0	0	0	0	0	0	0	0	0	0
Bacteria	p__Myxococcota	c__Polyangia	o__Polyangiales	f__Polyangiaceae	g__Unidentified	s__Unidentified	0	0	0	0.000356524	0	0	0	0	0	0	0.000486429	0	0	0
Bacteria	p__Proteobacteria	c__Gammaproteobacteria	o__Legionellales	f__Legionellaceae	g__Unidentified	s__Unidentified	0	0	0	0	0	0	0	0	0.000834082	0	0	0	0	0
Bacteria	p__Proteobacteria	c__Alphaproteobacteria	o__Rhizobiales	f__Hyphomicrobiaceae	g__Hyphomicrobium	s__Hyphomicrobium_A sulfonivorans	0.000821076	0	0	0	0	0	0	0	0	0	0	0	0	0
Bacteria	p__Bacteroidota	c__Bacteroidia	o__Bacteroidales	f__Rikenellaceae	g__Mucinivorans	s__Mucinivorans hirudinis	0	0	0	0.000814913	0	0	0	0	0	0	0	0	0	0
Bacteria	p__Chloroflexota	c__Anaerolineae	o__Aggregatilineales	f__A4b	g__OLB13	s__OLB13 sp016712885	0	0	0	0	0.000798085	0	0	0	0	0	0	0	0	0
Bacteria	p__Firmicutes	c__Bacilli	o__Lactobacillales	f__Lactobacillaceae	g__Ligilactobacillus	s__Unidentified	0	0	0	0	0.000798085	0	0	0	0	0	0	0	0	0
Bacteria	p__Patescibacteria	c__Saccharimonadia	o__Saccharimonadales	f__Saccharimonadaceae	g__Saccharimonas	s__Saccharimonas sp010202265	0.000797617	0	0	0	0	0	0	0	0	0	0	0	0	0
Bacteria	p__Bdellovibrionota	c__Bdellovibrionia	o__Bdellovibrionales	f__Bdellovibrionaceae	g__Bdellovibrio	s__Unidentified	0.000797617	0	0	0	0	0	0	0	0	0	0	0	0	0
Bacteria	p__Bdellovibrionota	c__Bdellovibrionia	o__Bdellovibrionales	f__Bdellovibrionaceae	g__Bdellovibrio	s__Bdellovibrio bacteriovorus	0	0	0	0	0	0	0	0	0	0	0.000778286	0	0	0
Bacteria	p__Bacteroidota	c__Bacteroidia	o__Chitinophagales	f__LD1	g__UBA1941	s__UBA1941 sp018267385	0	0	0	0	0	0	0	0	0.000769922	0	0	0	0	0
Bacteria	p__Bdellovibrionota	c__Bdellovibrionia	o__Bdellovibrionales	f__Bdellovibrionaceae	g__Pseudobdellovibrio	s__Pseudobdellovibrio exovorus	0.000750698	0	0	0	0	0	0	0	0	0	0	0	0	0
Bacteria	p__Proteobacteria	c__Alphaproteobacteria	o__Rhizobiales	f__Beijerinckiaceae	g__Unidentified	s__Unidentified	0.000750698	0	0	0	0	0	0	0	0	0	0	0	0	0
Bacteria	p__Bacteroidota	c__Bacteroidia	o__Flavobacteriales	f__Flavobacteriaceae	g__Flavobacterium	s__Flavobacterium succinicans	0	0	0	0	0	0	0	0	0.000705762	0	0	0	0	0
Bacteria	p__Actinobacteriota	c__Coriobacteriia	o__Coriobacteriales	f__Eggerthellaceae	g__CAG-1427	s__CAG-1427 sp000436075	0	0	0	0.000662117	0	0	0	0	0	0	0	0	0	0
Bacteria	p__Actinobacteriota	c__Actinomycetia	o__Actinomycetales	f__Microbacteriaceae	g__Agromyces	s__Agromyces lapidis	0	0	0	0	0.000638468	0	0	0	0	0	0	0	0	0
Bacteria	p__Bacteroidota	c__Bacteroidia	o__Bacteroidales	f__Dysgonomonadaceae	g__Dysgonomonas	s__Unidentified	0	0	0	0	0	0	0	0.000598245	0	0	0	0	0	0
Bacteria	p__Verrucomicrobiota	c__Verrucomicrobiae	o__Opitutales	f__Opitutaceae	g__Opi-474	s__Unidentified	0	0	0	0	0	0	0	0	0.000577441	0	0	0	0	0
Bacteria	p__Bacteroidota	c__Bacteroidia	o__Cytophagales	f__Spirosomaceae	g__Dyadobacter	s__Dyadobacter fermentans	0.000539564	0	0	0	0	0	0	0	0	0	0	0	0	0
Bacteria	p__Actinobacteriota	c__Acidimicrobiia	o__Acidimicrobiales	f__Unidentified	g__Unidentified	s__Unidentified	0	0	0.000520246	0	0	0	0	0	0	0	0	0	0	0
Bacteria	p__Actinobacteriota	c__Actinomycetia	o__Mycobacteriales	f__Micromonosporaceae	g__Catelliglobosispora	s__Catelliglobosispora koreensis	0	0	0	0	0	0	0	0	0.000513281	0	0	0	0	0
Bacteria	p__Firmicutes	c__Bacilli	o__Bacillales	f__Bacillaceae	g__Priestia	s__Unidentified	0.000469186	0	0	0	0	0	0	0	0	0	0	0	0	0
Bacteria	p__Gemmatimonadota	c__Gemmatimonadetes	o__Gemmatimonadales	f__Gemmatimonadaceae	g__AG11	s__AG11 sp002215645	0.00032843	0	0	0	0	0	0	0	0	0	0	0	0	0
Bacteria	p__Firmicutes	c__Clostridia	o__Christensenellales	f__Borkfalkiaceae	g__UBA1259	s__UBA1259 sp015069265	0	0	0	0	0	0	0	0.000265887	0	0	0	0	0	0
Bacteria	p__Firmicutes	c__Bacilli	o__Erysipelotrichales	f__Erysipelotrichaceae	g__Unidentified	s__Unidentified	0	0	0	0	0	0	0	0.000265887	0	0	0	0	0	0
Bacteria	p__Actinobacteriota	c__Geothermincolia	o__Geothermincolales	f__RBG-13-55-18	g__Unidentified	s__Unidentified	0.000140756	0	0	0	0	0	0	0	0	0	0	0	0	0
Bacteria	p__Firmicutes	c__Bacilli	o__Lactobacillales	f__Enterococcaceae	g__Unidentified	s__Unidentified	0	0	0	0	0	0	0	0.000132943	0	0	0	0	0	0
