# Supplementary material for: Effects of Trichoderma harzianum and Bacillus subtilis on the root and soil microbiomes of the soybean plant INTACTA RR2 PRO™
Source: Front Plant Sci. 2024 Aug 27;15:1403160. doi: 10.3389/fpls.2024.1403160 (PMC11383790; doi:10.3389/fpls.2024.1403160)
Supplement: Supplementary file 6 [file Table3.xlsx]

## Sheet: %Kingdom
Kingdom	T1-R	T2-R	T2-S	T3-R	T3-S	T4-R	T4-S	T5-R	T6-R	T7-R
k__Fungi	1	1	1	1	1	1	1	1	1	1

## Sheet: %Phylum
Kingdom	Phylum	T1-R	T2-R	T2-S	T3-R	T3-S	T4-R	T4-S	T5-R	T6-R	T7-R
k__Fungi	p__Ascomycota	1	1	0.925475	1	0.949457	1	0.989526	0.830544	0.959369	0.954114
k__Fungi	p__Basidiomycota	0	0	0.063322	0	0.0420406	0	0.0104738	0.169456	0.0406312	0.0391049
k__Fungi	p__Mortierellomycota	0	0	0	0	0.0085026	0	0	0	0	0.00678119
k__Fungi	p__Mucoromycota	0	0	0.0112031	0	0	0	0	0	0	0

## Sheet: %Class
Kingdom	Phylum	Class	T1-R	T2-R	T2-S	T3-R	T3-S	T4-R	T4-S	T5-R	T6-R	T7-R
k__Fungi	p__Ascomycota	c__Dothideomycetes	0.820382	0.882625	0.225037	0.436997	0.145961	0.80303	0.142311	0.379707	0.495464	0.405063
k__Fungi	p__Ascomycota	c__Sordariomycetes	0.179618	0.105175	0.488553	0.557641	0.684459	0.0606061	0.542311	0.354079	0.404734	0.396926
k__Fungi	p__Ascomycota	c__Saccharomycetes	0	0	0.166098	0	0.042513	0	0.257357	0.0224895	0.0284024	0.0379747
k__Fungi	p__Ascomycota	c__Eurotiomycetes	0	0	0.0457867	0.00536193	0.0418044	0.136364	0.0475478	0.0742678	0.0307692	0.11415
k__Fungi	p__Basidiomycota	c__Agaricomycetes	0	0	0.047735	0	0	0	0	0.140167	0.0153846	0.0336799
k__Fungi	p__Basidiomycota	c__Malasseziomycetes	0	0	0.0155869	0	0.0233821	0	0.0104738	0.0141213	0	0.00542495
k__Fungi	p__Basidiomycota	c__Tremellomycetes	0	0	0	0	0	0	0	0.0151674	0.0252465	0
k__Fungi	p__Ascomycota	c__Leotiomycetes	0	0	0	0	0.0347189	0	0	0	0	0
k__Fungi	p__Basidiomycota	c__Cystobasidiomycetes	0	0	0	0	0.0186585	0	0	0	0	0
k__Fungi	p__Mortierellomycota	c__Mortierellomycetes	0	0	0	0	0.0085026	0	0	0	0	0.00678119
k__Fungi	p__Ascomycota	c__Unidentified	0	0.0122003	0	0	0	0	0	0	0	0
k__Fungi	p__Mucoromycota	c__Umbelopsidomycetes	0	0	0.0112031	0	0	0	0	0	0	0

## Sheet: %Order
Kingdom	Phylum	Class	Order	T1-R	T2-R	T2-S	T3-R	T3-S	T4-R	T4-S	T5-R	T6-R	T7-R
k__Fungi	p__Ascomycota	c__Dothideomycetes	o__Pleosporales	0.798726	0.80101	0.212859	0.436997	0.0585735	0.80303	0.142311	0.359833	0.465878	0.346519
k__Fungi	p__Ascomycota	c__Sordariomycetes	o__Xylariales	0.00254777	0.00588978	0.193863	0	0.417336	0	0.329177	0.224372	0.237475	0.153933
k__Fungi	p__Ascomycota	c__Sordariomycetes	o__Hypocreales	0.17707	0.0992848	0.074038	0.557641	0.152574	0.0606061	0.0447215	0.042364	0.0859961	0.158002
k__Fungi	p__Ascomycota	c__Saccharomycetes	o__Saccharomycetales	0	0	0.166098	0	0.042513	0	0.257357	0.0224895	0.0284024	0.0379747
k__Fungi	p__Ascomycota	c__Eurotiomycetes	o__Eurotiales	0	0	0.0457867	0	0.0236183	0.136364	0.0475478	0.0742678	0.0307692	0.11415
k__Fungi	p__Ascomycota	c__Sordariomycetes	o__Diaporthales	0	0	0.107647	0	0.065659	0	0.115711	0.0371339	0	0.0307414
k__Fungi	p__Ascomycota	c__Sordariomycetes	o__Glomerellales	0	0	0.0964442	0	0.0488899	0	0.0408978	0.0381799	0.0457594	0.0413653
k__Fungi	p__Ascomycota	c__Dothideomycetes	o__Capnodiales	0.0216561	0.0816155	0.0121773	0	0.0753425	0	0	0.0198745	0.0295858	0.0363924
k__Fungi	p__Basidiomycota	c__Agaricomycetes	o__Agaricales	0	0	0	0	0	0	0	0.134414	0	0.00723327
k__Fungi	p__Basidiomycota	c__Malasseziomycetes	o__Malasseziales	0	0	0.0155869	0	0.0233821	0	0.0104738	0.0141213	0	0.00542495
k__Fungi	p__Ascomycota	c__Sordariomycetes	o__Unidentified	0	0	0.0165611	0	0	0	0.0118038	0	0.0272189	0
k__Fungi	p__Basidiomycota	c__Agaricomycetes	o__Polyporales	0	0	0.0199708	0	0	0	0	0.00575314	0	0.0183092
k__Fungi	p__Ascomycota	c__Leotiomycetes	o__Helotiales	0	0	0	0	0.0347189	0	0	0	0	0
k__Fungi	p__Ascomycota	c__Dothideomycetes	o__Venturiales	0	0	0	0	0.0120453	0	0	0	0	0.0221519
k__Fungi	p__Basidiomycota	c__Agaricomycetes	o__Cantharellales	0	0	0.0277642	0	0	0	0	0	0	0
k__Fungi	p__Basidiomycota	c__Tremellomycetes	o__Trichosporonales	0	0	0	0	0	0	0	0	0.0252465	0
k__Fungi	p__Basidiomycota	c__Agaricomycetes	o__Auriculariales	0	0	0	0	0	0	0	0	0.0153846	0.00813743
k__Fungi	p__Basidiomycota	c__Cystobasidiomycetes	o__Unidentified	0	0	0	0	0.0186585	0	0	0	0	0
k__Fungi	p__Ascomycota	c__Eurotiomycetes	o__Unidentified	0	0	0	0	0.0181861	0	0	0	0	0
k__Fungi	p__Mortierellomycota	c__Mortierellomycetes	o__Mortierellales	0	0	0	0	0.0085026	0	0	0	0	0.00678119
k__Fungi	p__Basidiomycota	c__Tremellomycetes	o__Tremellales	0	0	0	0	0	0	0	0.0151674	0	0
k__Fungi	p__Ascomycota	c__Sordariomycetes	o__Branch06	0	0	0	0	0	0	0	0	0	0.0128843
k__Fungi	p__Ascomycota	c__Unidentified	o__Unidentified	0	0.0122003	0	0	0	0	0	0	0	0
k__Fungi	p__Ascomycota	c__Sordariomycetes	o__Chaetosphaeriales	0	0	0	0	0	0	0	0.0120293	0	0
k__Fungi	p__Mucoromycota	c__Umbelopsidomycetes	o__Umbelopsidales	0	0	0.0112031	0	0	0	0	0	0	0
k__Fungi	p__Ascomycota	c__Sordariomycetes	o__Microascales	0	0	0	0	0	0	0	0	0.00828402	0
k__Fungi	p__Ascomycota	c__Eurotiomycetes	o__Chaetothyriales	0	0	0	0.00536193	0	0	0	0	0	0

## Sheet: %Family
Kingdom	Phylum	Class	Order	Family	T1-R	T2-R	T2-S	T3-R	T3-S	T4-R	T4-S	T5-R	T6-R	T7-R
k__Fungi	p__Ascomycota	c__Dothideomycetes	o__Pleosporales	f__Pleosporaceae	0.346497	0.368532	0.169508	0.353887	0.0205479	0.80303	0.118537	0.084728	0.416174	0.136302
k__Fungi	p__Ascomycota	c__Sordariomycetes	o__Xylariales	f__Sporocadaceae	0.00254777	0	0.193863	0	0.417336	0	0.329177	0.224372	0.237475	0.153933
k__Fungi	p__Ascomycota	c__Dothideomycetes	o__Pleosporales	f__Didymellaceae	0.33121	0.27135	0	0.0831099	0.0380255	0	0.0237739	0.275105	0.0224852	0.0124322
k__Fungi	p__Ascomycota	c__Sordariomycetes	o__Hypocreales	f__Nectriaceae	0.17707	0.0631048	0	0.557641	0.0462919	0	0.0103076	0	0	0.0223779
k__Fungi	p__Ascomycota	c__Eurotiomycetes	o__Eurotiales	f__Aspergillaceae	0	0	0.0457867	0	0.0236183	0.136364	0.0475478	0.0742678	0.0307692	0.11415
k__Fungi	p__Ascomycota	c__Sordariomycetes	o__Hypocreales	f__Hypocreaceae	0	0	0.074038	0	0.106282	0	0.0236076	0.042364	0.0859961	0.135624
k__Fungi	p__Ascomycota	c__Dothideomycetes	o__Pleosporales	f__Unidentified	0.121019	0.161127	0.0194837	0	0	0	0	0	0.0272189	0.110759
k__Fungi	p__Ascomycota	c__Saccharomycetes	o__Saccharomycetales	f__Unidentified	0	0	0.0837798	0	0	0	0.194347	0.0162134	0.0284024	0
k__Fungi	p__Ascomycota	c__Sordariomycetes	o__Glomerellales	f__Glomerellaceae	0	0	0.0964442	0	0.0488899	0	0.0362427	0.0381799	0.0457594	0.0413653
k__Fungi	p__Ascomycota	c__Dothideomycetes	o__Capnodiales	f__Cladosporiaceae	0.0216561	0.0816155	0.0121773	0	0.0753425	0	0	0.0198745	0.0295858	0.0363924
k__Fungi	p__Ascomycota	c__Sordariomycetes	o__Diaporthales	f__Diaporthaceae	0	0	0.107647	0	0.0625886	0	0.0124688	0.0266736	0	0.0307414
k__Fungi	p__Ascomycota	c__Saccharomycetes	o__Saccharomycetales	f__Pichiaceae	0	0	0.0750122	0	0.0377893	0	0.0440565	0	0	0.0192134
k__Fungi	p__Basidiomycota	c__Agaricomycetes	o__Agaricales	f__Psathyrellaceae	0	0	0	0	0	0	0	0.130753	0	0.00723327
k__Fungi	p__Ascomycota	c__Sordariomycetes	o__Diaporthales	f__Valsaceae	0	0	0	0	0.00307038	0	0.103242	0.0104603	0	0
k__Fungi	p__Ascomycota	c__Dothideomycetes	o__Pleosporales	f__Leptosphaeriaceae	0	0	0	0	0	0	0	0	0	0.0870253
k__Fungi	p__Basidiomycota	c__Malasseziomycetes	o__Malasseziales	f__Malasseziaceae	0	0	0.0155869	0	0.0233821	0	0.0104738	0.0141213	0	0.00542495
k__Fungi	p__Ascomycota	c__Sordariomycetes	o__Hypocreales	f__Bionectriaceae	0	0	0	0	0	0.0606061	0	0	0	0
k__Fungi	p__Ascomycota	c__Sordariomycetes	o__Unidentified	f__Unidentified	0	0	0.0165611	0	0	0	0.0118038	0	0.0272189	0
k__Fungi	p__Ascomycota	c__Sordariomycetes	o__Hypocreales	f__Stachybotryaceae	0	0.0361801	0	0	0	0	0	0	0	0
k__Fungi	p__Ascomycota	c__Leotiomycetes	o__Helotiales	f__Unidentified	0	0	0	0	0.0347189	0	0	0	0	0
k__Fungi	p__Ascomycota	c__Dothideomycetes	o__Venturiales	f__Unidentified	0	0	0	0	0.0120453	0	0	0	0	0.0221519
k__Fungi	p__Ascomycota	c__Saccharomycetes	o__Saccharomycetales	f__Debaryomycetaceae	0	0	0.00730638	0	0	0	0.00299252	0	0	0.0187613
k__Fungi	p__Basidiomycota	c__Agaricomycetes	o__Cantharellales	f__Unidentified	0	0	0.0277642	0	0	0	0	0	0	0
k__Fungi	p__Basidiomycota	c__Tremellomycetes	o__Trichosporonales	f__Trichosporonaceae	0	0	0	0	0	0	0	0	0.0252465	0
k__Fungi	p__Ascomycota	c__Dothideomycetes	o__Pleosporales	f__Sporormiaceae	0	0	0.0238675	0	0	0	0	0	0	0
k__Fungi	p__Basidiomycota	c__Agaricomycetes	o__Polyporales	f__Polyporaceae	0	0	0.0199708	0	0	0	0	0	0	0
k__Fungi	p__Basidiomycota	c__Cystobasidiomycetes	o__Unidentified	f__Unidentified	0	0	0	0	0.0186585	0	0	0	0	0
k__Fungi	p__Basidiomycota	c__Agaricomycetes	o__Polyporales	f__Meruliaceae	0	0	0	0	0	0	0	0	0	0.0183092
k__Fungi	p__Ascomycota	c__Eurotiomycetes	o__Unidentified	f__Unidentified	0	0	0	0	0.0181861	0	0	0	0	0
k__Fungi	p__Basidiomycota	c__Agaricomycetes	o__Auriculariales	f__Unidentified	0	0	0	0	0	0	0	0	0.0153846	0
k__Fungi	p__Mortierellomycota	c__Mortierellomycetes	o__Mortierellales	f__Mortierellaceae	0	0	0	0	0.0085026	0	0	0	0	0.00678119
k__Fungi	p__Basidiomycota	c__Tremellomycetes	o__Tremellales	f__Rhynchogastremataceae	0	0	0	0	0	0	0	0.0151674	0	0
k__Fungi	p__Ascomycota	c__Sordariomycetes	o__Branch06	f__Unidentified	0	0	0	0	0	0	0	0	0	0.0128843
k__Fungi	p__Ascomycota	c__Unidentified	o__Unidentified	f__Unidentified	0	0.0122003	0	0	0	0	0	0	0	0
k__Fungi	p__Ascomycota	c__Sordariomycetes	o__Chaetosphaeriales	f__Chaetosphaeriaceae	0	0	0	0	0	0	0	0.0120293	0	0
k__Fungi	p__Ascomycota	c__Saccharomycetes	o__Saccharomycetales	f__Saccharomycetaceae	0	0	0	0	0.00472367	0	0.00648379	0	0	0
k__Fungi	p__Mucoromycota	c__Umbelopsidomycetes	o__Umbelopsidales	f__Umbelopsidaceae	0	0	0.0112031	0	0	0	0	0	0	0
k__Fungi	p__Ascomycota	c__Sordariomycetes	o__Hypocreales	f__Cordycipitaceae	0	0	0	0	0	0	0.0108063	0	0	0
k__Fungi	p__Ascomycota	c__Saccharomycetes	o__Saccharomycetales	f__Phaffomycetaceae	0	0	0	0	0	0	0.00947631	0	0	0
k__Fungi	p__Ascomycota	c__Sordariomycetes	o__Microascales	f__Microascaceae	0	0	0	0	0	0	0	0	0.00828402	0
k__Fungi	p__Basidiomycota	c__Agaricomycetes	o__Auriculariales	f__Exidiaceae	0	0	0	0	0	0	0	0	0	0.00813743
k__Fungi	p__Ascomycota	c__Saccharomycetes	o__Saccharomycetales	f__Saccharomycetales_fam_Incertae_sedis	0	0	0	0	0	0	0	0.00627615	0	0
k__Fungi	p__Ascomycota	c__Sordariomycetes	o__Xylariales	f__Unidentified	0	0.00588978	0	0	0	0	0	0	0	0
k__Fungi	p__Basidiomycota	c__Agaricomycetes	o__Polyporales	f__Hyphodermataceae	0	0	0	0	0	0	0	0.00575314	0	0
k__Fungi	p__Ascomycota	c__Eurotiomycetes	o__Chaetothyriales	f__Herpotrichiellaceae	0	0	0	0.00536193	0	0	0	0	0	0
k__Fungi	p__Ascomycota	c__Sordariomycetes	o__Glomerellales	f__Plectosphaerellaceae	0	0	0	0	0	0	0.00465503	0	0	0
k__Fungi	p__Basidiomycota	c__Agaricomycetes	o__Agaricales	f__Physalacriaceae	0	0	0	0	0	0	0	0.00366109	0	0

## Sheet: %Genus
Kingdom	Phylum	Class	Order	Family	Genus	T1-R	T2-R	T2-S	T3-R	T3-S	T4-R	T4-S	T5-R	T6-R	T7-R
k__Fungi	p__Ascomycota	c__Dothideomycetes	o__Pleosporales	f__Pleosporaceae	g__Curvularia	0.346497	0.355069	0	0.353887	0	0.80303	0	0.0135983	0.0690335	0.00497288
k__Fungi	p__Ascomycota	c__Sordariomycetes	o__Xylariales	f__Sporocadaceae	g__Neopestalotiopsis	0.00254777	0	0.183147	0	0.384506	0	0.329177	0.218096	0.216174	0.153933
k__Fungi	p__Ascomycota	c__Dothideomycetes	o__Pleosporales	f__Didymellaceae	g__Epicoccum	0.33121	0.27135	0	0	0	0	0.0237739	0.275105	0	0
k__Fungi	p__Ascomycota	c__Sordariomycetes	o__Hypocreales	f__Nectriaceae	g__Fusarium	0.0318471	0.0631048	0	0.557641	0.0462919	0	0.0103076	0	0	0.0223779
k__Fungi	p__Ascomycota	c__Dothideomycetes	o__Pleosporales	f__Pleosporaceae	g__Bipolaris	0	0	0.169508	0	0.0205479	0	0.0974231	0.0711297	0.0710059	0.0603526
k__Fungi	p__Ascomycota	c__Sordariomycetes	o__Hypocreales	f__Hypocreaceae	g__Trichoderma	0	0	0.074038	0	0.106282	0	0.0236076	0.042364	0.0859961	0.135624
k__Fungi	p__Ascomycota	c__Eurotiomycetes	o__Eurotiales	f__Aspergillaceae	g__Aspergillus	0	0	0.0457867	0	0.0236183	0.136364	0.0292602	0.0742678	0.0307692	0.11415
k__Fungi	p__Ascomycota	c__Dothideomycetes	o__Pleosporales	f__Unidentified	g__Unidentified	0.121019	0.161127	0.0194837	0	0	0	0	0	0.0272189	0.110759
k__Fungi	p__Ascomycota	c__Dothideomycetes	o__Pleosporales	f__Pleosporaceae	g__Alternaria	0	0	0	0	0	0	0.0103076	0	0.276134	0.0709765
k__Fungi	p__Ascomycota	c__Saccharomycetes	o__Saccharomycetales	f__Unidentified	g__Unidentified	0	0	0.0837798	0	0	0	0.194347	0.0162134	0.0284024	0
k__Fungi	p__Ascomycota	c__Sordariomycetes	o__Glomerellales	f__Glomerellaceae	g__Colletotrichum	0	0	0.0964442	0	0.0488899	0	0.0362427	0.0381799	0.0457594	0.0413653
k__Fungi	p__Ascomycota	c__Dothideomycetes	o__Capnodiales	f__Cladosporiaceae	g__Cladosporium	0.0216561	0.0816155	0.0121773	0	0.0753425	0	0	0.0198745	0.0295858	0.0363924
k__Fungi	p__Ascomycota	c__Sordariomycetes	o__Diaporthales	f__Diaporthaceae	g__Diaporthe	0	0	0.107647	0	0.0625886	0	0.0124688	0.0266736	0	0.0307414
k__Fungi	p__Ascomycota	c__Sordariomycetes	o__Hypocreales	f__Nectriaceae	g__Unidentified	0.145223	0	0	0	0	0	0	0	0	0
k__Fungi	p__Ascomycota	c__Dothideomycetes	o__Pleosporales	f__Didymellaceae	g__Unidentified	0	0	0	0.0831099	0.0380255	0	0	0	0.0224852	0
k__Fungi	p__Basidiomycota	c__Agaricomycetes	o__Agaricales	f__Psathyrellaceae	g__Coprinellus	0	0	0	0	0	0	0	0.130753	0	0.00723327
k__Fungi	p__Ascomycota	c__Sordariomycetes	o__Diaporthales	f__Valsaceae	g__Cytospora	0	0	0	0	0.00307038	0	0.103242	0.0104603	0	0
k__Fungi	p__Ascomycota	c__Saccharomycetes	o__Saccharomycetales	f__Pichiaceae	g__Dekkera	0	0	0.0511447	0	0	0	0.0440565	0	0	0.0192134
k__Fungi	p__Ascomycota	c__Dothideomycetes	o__Pleosporales	f__Leptosphaeriaceae	g__Unidentified	0	0	0	0	0	0	0	0	0	0.0870253
k__Fungi	p__Ascomycota	c__Sordariomycetes	o__Xylariales	f__Sporocadaceae	g__Pestalotiopsis	0	0	0.010716	0	0.0328295	0	0	0.00627615	0.0213018	0
k__Fungi	p__Basidiomycota	c__Malasseziomycetes	o__Malasseziales	f__Malasseziaceae	g__Malassezia	0	0	0.0155869	0	0.0233821	0	0.0104738	0.0141213	0	0.00542495
k__Fungi	p__Ascomycota	c__Sordariomycetes	o__Hypocreales	f__Bionectriaceae	g__Clonostachys	0	0	0	0	0	0.0606061	0	0	0	0
k__Fungi	p__Ascomycota	c__Sordariomycetes	o__Unidentified	f__Unidentified	g__Unidentified	0	0	0.0165611	0	0	0	0.0118038	0	0.0272189	0
k__Fungi	p__Ascomycota	c__Saccharomycetes	o__Saccharomycetales	f__Pichiaceae	g__Pichia	0	0	0	0	0.0377893	0	0	0	0	0
k__Fungi	p__Ascomycota	c__Sordariomycetes	o__Hypocreales	f__Stachybotryaceae	g__Unidentified	0	0.0361801	0	0	0	0	0	0	0	0
k__Fungi	p__Ascomycota	c__Leotiomycetes	o__Helotiales	f__Unidentified	g__Unidentified	0	0	0	0	0.0347189	0	0	0	0	0
k__Fungi	p__Ascomycota	c__Dothideomycetes	o__Venturiales	f__Unidentified	g__Unidentified	0	0	0	0	0.0120453	0	0	0	0	0.0221519
k__Fungi	p__Basidiomycota	c__Agaricomycetes	o__Cantharellales	f__Unidentified	g__Unidentified	0	0	0.0277642	0	0	0	0	0	0	0
k__Fungi	p__Basidiomycota	c__Tremellomycetes	o__Trichosporonales	f__Trichosporonaceae	g__Cutaneotrichosporon	0	0	0	0	0	0	0	0	0.0252465	0
k__Fungi	p__Ascomycota	c__Dothideomycetes	o__Pleosporales	f__Sporormiaceae	g__Westerdykella	0	0	0.0238675	0	0	0	0	0	0	0
k__Fungi	p__Ascomycota	c__Saccharomycetes	o__Saccharomycetales	f__Pichiaceae	g__Unidentified	0	0	0.0238675	0	0	0	0	0	0	0
k__Fungi	p__Basidiomycota	c__Agaricomycetes	o__Polyporales	f__Polyporaceae	g__Unidentified	0	0	0.0199708	0	0	0	0	0	0	0
k__Fungi	p__Ascomycota	c__Saccharomycetes	o__Saccharomycetales	f__Debaryomycetaceae	g__Meyerozyma	0	0	0	0	0	0	0	0	0	0.0187613
k__Fungi	p__Basidiomycota	c__Cystobasidiomycetes	o__Unidentified	f__Unidentified	g__Unidentified	0	0	0	0	0.0186585	0	0	0	0	0
k__Fungi	p__Basidiomycota	c__Agaricomycetes	o__Polyporales	f__Meruliaceae	g__Unidentified	0	0	0	0	0	0	0	0	0	0.0183092
k__Fungi	p__Ascomycota	c__Eurotiomycetes	o__Eurotiales	f__Aspergillaceae	g__Penicillium	0	0	0	0	0	0	0.0182876	0	0	0
k__Fungi	p__Ascomycota	c__Eurotiomycetes	o__Unidentified	f__Unidentified	g__Unidentified	0	0	0	0	0.0181861	0	0	0	0	0
k__Fungi	p__Basidiomycota	c__Agaricomycetes	o__Auriculariales	f__Unidentified	g__Unidentified	0	0	0	0	0	0	0	0	0.0153846	0
k__Fungi	p__Mortierellomycota	c__Mortierellomycetes	o__Mortierellales	f__Mortierellaceae	g__Mortierella	0	0	0	0	0.0085026	0	0	0	0	0.00678119
k__Fungi	p__Basidiomycota	c__Tremellomycetes	o__Tremellales	f__Rhynchogastremataceae	g__Papiliotrema	0	0	0	0	0	0	0	0.0151674	0	0
k__Fungi	p__Ascomycota	c__Dothideomycetes	o__Pleosporales	f__Pleosporaceae	g__Exserohilum	0	0.0134623	0	0	0	0	0	0	0	0
k__Fungi	p__Ascomycota	c__Sordariomycetes	o__Branch06	f__Unidentified	g__Unidentified	0	0	0	0	0	0	0	0	0	0.0128843
k__Fungi	p__Ascomycota	c__Dothideomycetes	o__Pleosporales	f__Didymellaceae	g__Stagonosporopsis	0	0	0	0	0	0	0	0	0	0.0124322
k__Fungi	p__Ascomycota	c__Unidentified	o__Unidentified	f__Unidentified	g__Unidentified	0	0.0122003	0	0	0	0	0	0	0	0
k__Fungi	p__Ascomycota	c__Sordariomycetes	o__Chaetosphaeriales	f__Chaetosphaeriaceae	g__Unidentified	0	0	0	0	0	0	0	0.0120293	0	0
k__Fungi	p__Ascomycota	c__Saccharomycetes	o__Saccharomycetales	f__Saccharomycetaceae	g__Saccharomyces	0	0	0	0	0.00472367	0	0.00648379	0	0	0
k__Fungi	p__Mucoromycota	c__Umbelopsidomycetes	o__Umbelopsidales	f__Umbelopsidaceae	g__Umbelopsis	0	0	0.0112031	0	0	0	0	0	0	0
k__Fungi	p__Ascomycota	c__Sordariomycetes	o__Hypocreales	f__Cordycipitaceae	g__Unidentified	0	0	0	0	0	0	0.0108063	0	0	0
k__Fungi	p__Ascomycota	c__Dothideomycetes	o__Pleosporales	f__Pleosporaceae	g__Unidentified	0	0	0	0	0	0	0.0108063	0	0	0
k__Fungi	p__Ascomycota	c__Saccharomycetes	o__Saccharomycetales	f__Debaryomycetaceae	g__Debaryomyces	0	0	0.00730638	0	0	0	0.00299252	0	0	0
k__Fungi	p__Ascomycota	c__Saccharomycetes	o__Saccharomycetales	f__Phaffomycetaceae	g__Wickerhamomyces	0	0	0	0	0	0	0.00947631	0	0	0
k__Fungi	p__Ascomycota	c__Sordariomycetes	o__Microascales	f__Microascaceae	g__Unidentified	0	0	0	0	0	0	0	0	0.00828402	0
k__Fungi	p__Basidiomycota	c__Agaricomycetes	o__Auriculariales	f__Exidiaceae	g__Eichleriella	0	0	0	0	0	0	0	0	0	0.00813743
k__Fungi	p__Ascomycota	c__Saccharomycetes	o__Saccharomycetales	f__Saccharomycetales_fam_Incertae_sedis	g__Unidentified	0	0	0	0	0	0	0	0.00627615	0	0
k__Fungi	p__Ascomycota	c__Sordariomycetes	o__Xylariales	f__Unidentified	g__Unidentified	0	0.00588978	0	0	0	0	0	0	0	0
k__Fungi	p__Basidiomycota	c__Agaricomycetes	o__Polyporales	f__Hyphodermataceae	g__Hyphoderma	0	0	0	0	0	0	0	0.00575314	0	0
k__Fungi	p__Ascomycota	c__Eurotiomycetes	o__Chaetothyriales	f__Herpotrichiellaceae	g__Exophiala	0	0	0	0.00536193	0	0	0	0	0	0
k__Fungi	p__Ascomycota	c__Sordariomycetes	o__Glomerellales	f__Plectosphaerellaceae	g__Plectosphaerella	0	0	0	0	0	0	0.00465503	0	0	0
k__Fungi	p__Basidiomycota	c__Agaricomycetes	o__Agaricales	f__Physalacriaceae	g__Unidentified	0	0	0	0	0	0	0	0.00366109	0	0

## Sheet: %Species
Kingdom	Phylum	Class	Order	Family	Genus	Species	T1-R	T2-R	T2-S	T3-R	T3-S	T4-R	T4-S	T5-R	T6-R	T7-R
k__Fungi	p__Ascomycota	c__Dothideomycetes	o__Pleosporales	f__Pleosporaceae	g__Curvularia	s__Unidentified	0.346497	0.355069	0	0.353887	0	0.80303	0	0.0135983	0.0690335	0.00497288
k__Fungi	p__Ascomycota	c__Sordariomycetes	o__Xylariales	f__Sporocadaceae	g__Neopestalotiopsis	s__Unidentified	0.00254777	0	0.183147	0	0.384506	0	0.329177	0.218096	0.216174	0.153933
k__Fungi	p__Ascomycota	c__Dothideomycetes	o__Pleosporales	f__Didymellaceae	g__Epicoccum	s__Unidentified	0.33121	0.27135	0	0	0	0	0.0237739	0.275105	0	0
k__Fungi	p__Ascomycota	c__Sordariomycetes	o__Hypocreales	f__Nectriaceae	g__Fusarium	s__Unidentified	0.0318471	0.0631048	0	0.557641	0.0462919	0	0.0103076	0	0	0.0223779
k__Fungi	p__Ascomycota	c__Dothideomycetes	o__Pleosporales	f__Pleosporaceae	g__Bipolaris	s__Unidentified	0	0	0.169508	0	0.0205479	0	0.0974231	0.0711297	0.0710059	0.0603526
k__Fungi	p__Ascomycota	c__Sordariomycetes	o__Hypocreales	f__Hypocreaceae	g__Trichoderma	s__Unidentified	0	0	0.074038	0	0.106282	0	0.0236076	0.042364	0.0859961	0.135624
k__Fungi	p__Ascomycota	c__Eurotiomycetes	o__Eurotiales	f__Aspergillaceae	g__Aspergillus	s__Unidentified	0	0	0.0457867	0	0.0236183	0.136364	0.0151288	0.0742678	0.0307692	0.11415
k__Fungi	p__Ascomycota	c__Dothideomycetes	o__Pleosporales	f__Unidentified	g__Unidentified	s__Unidentified	0.121019	0.161127	0.0194837	0	0	0	0	0	0.0272189	0.110759
k__Fungi	p__Ascomycota	c__Dothideomycetes	o__Pleosporales	f__Pleosporaceae	g__Alternaria	s__Unidentified	0	0	0	0	0	0	0.0103076	0	0.276134	0.0709765
k__Fungi	p__Ascomycota	c__Saccharomycetes	o__Saccharomycetales	f__Unidentified	g__Unidentified	s__Unidentified	0	0	0.0837798	0	0	0	0.194347	0.0162134	0.0284024	0
k__Fungi	p__Ascomycota	c__Sordariomycetes	o__Glomerellales	f__Glomerellaceae	g__Colletotrichum	s__Unidentified	0	0	0.0964442	0	0.0488899	0	0.0362427	0.0381799	0.0457594	0.0413653
k__Fungi	p__Ascomycota	c__Dothideomycetes	o__Capnodiales	f__Cladosporiaceae	g__Cladosporium	s__Unidentified	0.0216561	0.0816155	0.0121773	0	0.0753425	0	0	0.0198745	0.0295858	0.0363924
k__Fungi	p__Ascomycota	c__Sordariomycetes	o__Diaporthales	f__Diaporthaceae	g__Diaporthe	s__Unidentified	0	0	0.107647	0	0.0625886	0	0.0124688	0.0266736	0	0.0307414
k__Fungi	p__Ascomycota	c__Sordariomycetes	o__Hypocreales	f__Nectriaceae	g__Unidentified	s__Unidentified	0.145223	0	0	0	0	0	0	0	0	0
k__Fungi	p__Ascomycota	c__Dothideomycetes	o__Pleosporales	f__Didymellaceae	g__Unidentified	s__Unidentified	0	0	0	0.0831099	0.0380255	0	0	0	0.0224852	0
k__Fungi	p__Basidiomycota	c__Agaricomycetes	o__Agaricales	f__Psathyrellaceae	g__Coprinellus	s__Unidentified	0	0	0	0	0	0	0	0.130753	0	0.00723327
k__Fungi	p__Ascomycota	c__Sordariomycetes	o__Diaporthales	f__Valsaceae	g__Cytospora	s__Unidentified	0	0	0	0	0.00307038	0	0.103242	0.0104603	0	0
k__Fungi	p__Ascomycota	c__Saccharomycetes	o__Saccharomycetales	f__Pichiaceae	g__Dekkera	s__Dekkera_custersiana	0	0	0.0511447	0	0	0	0.0440565	0	0	0.0192134
k__Fungi	p__Ascomycota	c__Dothideomycetes	o__Pleosporales	f__Leptosphaeriaceae	g__Unidentified	s__Unidentified	0	0	0	0	0	0	0	0	0	0.0870253
k__Fungi	p__Ascomycota	c__Sordariomycetes	o__Xylariales	f__Sporocadaceae	g__Pestalotiopsis	s__Unidentified	0	0	0.010716	0	0.0328295	0	0	0.00627615	0.0213018	0
k__Fungi	p__Basidiomycota	c__Malasseziomycetes	o__Malasseziales	f__Malasseziaceae	g__Malassezia	s__Unidentified	0	0	0.0155869	0	0.0233821	0	0.0104738	0.0141213	0	0.00542495
k__Fungi	p__Ascomycota	c__Sordariomycetes	o__Hypocreales	f__Bionectriaceae	g__Clonostachys	s__Unidentified	0	0	0	0	0	0.0606061	0	0	0	0
k__Fungi	p__Ascomycota	c__Sordariomycetes	o__Unidentified	f__Unidentified	g__Unidentified	s__Unidentified	0	0	0.0165611	0	0	0	0.0118038	0	0.0272189	0
k__Fungi	p__Ascomycota	c__Saccharomycetes	o__Saccharomycetales	f__Pichiaceae	g__Pichia	s__Unidentified	0	0	0	0	0.0377893	0	0	0	0	0
k__Fungi	p__Ascomycota	c__Sordariomycetes	o__Hypocreales	f__Stachybotryaceae	g__Unidentified	s__Unidentified	0	0.0361801	0	0	0	0	0	0	0	0
k__Fungi	p__Ascomycota	c__Leotiomycetes	o__Helotiales	f__Unidentified	g__Unidentified	s__Unidentified	0	0	0	0	0.0347189	0	0	0	0	0
k__Fungi	p__Ascomycota	c__Dothideomycetes	o__Venturiales	f__Unidentified	g__Unidentified	s__Unidentified	0	0	0	0	0.0120453	0	0	0	0	0.0221519
k__Fungi	p__Basidiomycota	c__Agaricomycetes	o__Cantharellales	f__Unidentified	g__Unidentified	s__Unidentified	0	0	0.0277642	0	0	0	0	0	0	0
k__Fungi	p__Basidiomycota	c__Tremellomycetes	o__Trichosporonales	f__Trichosporonaceae	g__Cutaneotrichosporon	s__Unidentified	0	0	0	0	0	0	0	0	0.0252465	0
k__Fungi	p__Ascomycota	c__Dothideomycetes	o__Pleosporales	f__Sporormiaceae	g__Westerdykella	s__Unidentified	0	0	0.0238675	0	0	0	0	0	0	0
k__Fungi	p__Ascomycota	c__Saccharomycetes	o__Saccharomycetales	f__Pichiaceae	g__Unidentified	s__Unidentified	0	0	0.0238675	0	0	0	0	0	0	0
k__Fungi	p__Basidiomycota	c__Agaricomycetes	o__Polyporales	f__Polyporaceae	g__Unidentified	s__Unidentified	0	0	0.0199708	0	0	0	0	0	0	0
k__Fungi	p__Ascomycota	c__Saccharomycetes	o__Saccharomycetales	f__Debaryomycetaceae	g__Meyerozyma	s__Unidentified	0	0	0	0	0	0	0	0	0	0.0187613
k__Fungi	p__Basidiomycota	c__Cystobasidiomycetes	o__Unidentified	f__Unidentified	g__Unidentified	s__Unidentified	0	0	0	0	0.0186585	0	0	0	0	0
k__Fungi	p__Basidiomycota	c__Agaricomycetes	o__Polyporales	f__Meruliaceae	g__Unidentified	s__Unidentified	0	0	0	0	0	0	0	0	0	0.0183092
k__Fungi	p__Ascomycota	c__Eurotiomycetes	o__Eurotiales	f__Aspergillaceae	g__Penicillium	s__Unidentified	0	0	0	0	0	0	0.0182876	0	0	0
k__Fungi	p__Ascomycota	c__Eurotiomycetes	o__Unidentified	f__Unidentified	g__Unidentified	s__Unidentified	0	0	0	0	0.0181861	0	0	0	0	0
k__Fungi	p__Basidiomycota	c__Agaricomycetes	o__Auriculariales	f__Unidentified	g__Unidentified	s__Unidentified	0	0	0	0	0	0	0	0	0.0153846	0
k__Fungi	p__Mortierellomycota	c__Mortierellomycetes	o__Mortierellales	f__Mortierellaceae	g__Mortierella	s__Unidentified	0	0	0	0	0.0085026	0	0	0	0	0.00678119
k__Fungi	p__Basidiomycota	c__Tremellomycetes	o__Tremellales	f__Rhynchogastremataceae	g__Papiliotrema	s__Unidentified	0	0	0	0	0	0	0	0.0151674	0	0
k__Fungi	p__Ascomycota	c__Eurotiomycetes	o__Eurotiales	f__Aspergillaceae	g__Aspergillus	s__Aspergillus_niger	0	0	0	0	0	0	0.0141313	0	0	0
k__Fungi	p__Ascomycota	c__Dothideomycetes	o__Pleosporales	f__Pleosporaceae	g__Exserohilum	s__Unidentified	0	0.0134623	0	0	0	0	0	0	0	0
k__Fungi	p__Ascomycota	c__Sordariomycetes	o__Branch06	f__Unidentified	g__Unidentified	s__Unidentified	0	0	0	0	0	0	0	0	0	0.0128843
k__Fungi	p__Ascomycota	c__Dothideomycetes	o__Pleosporales	f__Didymellaceae	g__Stagonosporopsis	s__Unidentified	0	0	0	0	0	0	0	0	0	0.0124322
k__Fungi	p__Ascomycota	c__Unidentified	o__Unidentified	f__Unidentified	g__Unidentified	s__Unidentified	0	0.0122003	0	0	0	0	0	0	0	0
k__Fungi	p__Ascomycota	c__Sordariomycetes	o__Chaetosphaeriales	f__Chaetosphaeriaceae	g__Unidentified	s__Unidentified	0	0	0	0	0	0	0	0.0120293	0	0
k__Fungi	p__Ascomycota	c__Saccharomycetes	o__Saccharomycetales	f__Saccharomycetaceae	g__Saccharomyces	s__Unidentified	0	0	0	0	0.00472367	0	0.00648379	0	0	0
k__Fungi	p__Mucoromycota	c__Umbelopsidomycetes	o__Umbelopsidales	f__Umbelopsidaceae	g__Umbelopsis	s__Unidentified	0	0	0.0112031	0	0	0	0	0	0	0
k__Fungi	p__Ascomycota	c__Sordariomycetes	o__Hypocreales	f__Cordycipitaceae	g__Unidentified	s__Unidentified	0	0	0	0	0	0	0.0108063	0	0	0
k__Fungi	p__Ascomycota	c__Dothideomycetes	o__Pleosporales	f__Pleosporaceae	g__Unidentified	s__Unidentified	0	0	0	0	0	0	0.0108063	0	0	0
k__Fungi	p__Ascomycota	c__Saccharomycetes	o__Saccharomycetales	f__Debaryomycetaceae	g__Debaryomyces	s__Unidentified	0	0	0.00730638	0	0	0	0.00299252	0	0	0
k__Fungi	p__Ascomycota	c__Saccharomycetes	o__Saccharomycetales	f__Phaffomycetaceae	g__Wickerhamomyces	s__Unidentified	0	0	0	0	0	0	0.00947631	0	0	0
k__Fungi	p__Ascomycota	c__Sordariomycetes	o__Microascales	f__Microascaceae	g__Unidentified	s__Unidentified	0	0	0	0	0	0	0	0	0.00828402	0
k__Fungi	p__Basidiomycota	c__Agaricomycetes	o__Auriculariales	f__Exidiaceae	g__Eichleriella	s__Unidentified	0	0	0	0	0	0	0	0	0	0.00813743
k__Fungi	p__Ascomycota	c__Saccharomycetes	o__Saccharomycetales	f__Saccharomycetales_fam_Incertae_sedis	g__Unidentified	s__Unidentified	0	0	0	0	0	0	0	0.00627615	0	0
k__Fungi	p__Ascomycota	c__Sordariomycetes	o__Xylariales	f__Unidentified	g__Unidentified	s__Unidentified	0	0.00588978	0	0	0	0	0	0	0	0
k__Fungi	p__Basidiomycota	c__Agaricomycetes	o__Polyporales	f__Hyphodermataceae	g__Hyphoderma	s__Unidentified	0	0	0	0	0	0	0	0.00575314	0	0
k__Fungi	p__Ascomycota	c__Eurotiomycetes	o__Chaetothyriales	f__Herpotrichiellaceae	g__Exophiala	s__Unidentified	0	0	0	0.00536193	0	0	0	0	0	0
k__Fungi	p__Ascomycota	c__Sordariomycetes	o__Glomerellales	f__Plectosphaerellaceae	g__Plectosphaerella	s__Unidentified	0	0	0	0	0	0	0.00465503	0	0	0
k__Fungi	p__Basidiomycota	c__Agaricomycetes	o__Agaricales	f__Physalacriaceae	g__Unidentified	s__Unidentified	0	0	0	0	0	0	0	0.00366109	0	0
